# Supplementary material for: Single Electron Transfer to Diazomethane–Borane Adducts Prompts C−H Bond Activations
Source: PubMed Central journal article supplement (PMC6972512; doi:10.1002/anie.201912338), 2019-10-30
Supplement: ANIE-58-18487-s001.pdf [file ANIE-58-18487-s001.pdf]

Supporting Information

**Single Electron Transfer to Diazomethane–Borane Adducts Prompts  
C–H Bond Activations**

*Levy L. Cao, Jiliang Zhou, Zheng-Wang Qu,\* and Douglas W. Stephan\**

anie\_201912338\_sm\_miscellaneous\_information.pdf

## Supporting information

### Contents

|                                                                                                                                                                                                                                                                                        |    |
|----------------------------------------------------------------------------------------------------------------------------------------------------------------------------------------------------------------------------------------------------------------------------------------|----|
| 1. Syntheses.....                                                                                                                                                                                                                                                                      | 3  |
| General Considerations .....                                                                                                                                                                                                                                                           | 3  |
| Synthesis of $[\text{Cp}^*_2\text{Co}][(\text{Ph}_2\text{CNNHB}(\text{C}_6\text{F}_5)_3]$ ( <b>1</b> ) and $[\text{Cp}^*\text{CoC}_5\text{Me}_4\text{CH}_2\text{B}(\text{C}_6\text{F}_5)_3]$ ( <b>2</b> ) .....                                                                        | 4  |
| Synthesis of $[\text{Cp}^*_2\text{Cr}][(\text{PhC}(\text{C}_6\text{H}_4)\text{NNBPh}_3]$ ( <b>3</b> ) and $[\text{Cp}^*_2\text{Cr}][\text{Ph}_2\text{CNNHBPh}_3]$ ( <b>4</b> ) .....                                                                                                   | 10 |
| Synthesis of $(\text{C}_{12}\text{H}_8)\text{C}(\text{C}_6\text{F}_5)(\text{B}(\text{C}_6\text{F}_5)_2)$ .....                                                                                                                                                                         | 13 |
| Generation of $[\text{Cp}^*_2\text{Cr}][\text{C}_{12}\text{H}_8\text{CNNHBPh}_3]$ ( <b>5</b> ), $[\text{Cp}^*_2\text{Cr}][\text{C}_{13}\text{H}_7\text{N}_2(\text{BPh}_3)]$ ( <b>6</b> ) and $[\text{Cp}^*\text{Cr}(\text{C}_5\text{Me}_4\text{CH}_2\text{BPh}_3)]$ ( <b>7</b> ) ..... | 16 |
| Synthesis of $[\text{Cp}^*_2\text{Fe}][\text{C}_{12}\text{H}_8\text{CNNH}(\text{Al}(\text{C}_6\text{F}_5)_3)]$ ( <b>8</b> ) .....                                                                                                                                                      | 18 |
| Generation of <b>8</b> and $[\text{Cp}^*_2\text{Fe}][(\text{C}_{12}\text{H}_8)\text{CH}(\text{Al}(\text{C}_6\text{F}_5)_3)]$ ( <b>9</b> ) .....                                                                                                                                        | 21 |
| 2. X-ray Crystallography .....                                                                                                                                                                                                                                                         | 23 |
| 3. Computational Chemistry .....                                                                                                                                                                                                                                                       | 27 |
| 4. References.....                                                                                                                                                                                                                                                                     | 51 |

## Lists of Figures

|                                                                                                                                                                                                                                                                                                                                                                                                                                                                                                                                                                                                                                                              |    |
|--------------------------------------------------------------------------------------------------------------------------------------------------------------------------------------------------------------------------------------------------------------------------------------------------------------------------------------------------------------------------------------------------------------------------------------------------------------------------------------------------------------------------------------------------------------------------------------------------------------------------------------------------------------|----|
| Figure S1. $^{11}\text{B}\{^1\text{H}\}$ NMR of the crude reaction for <b>1</b> and <b>2</b> .....                                                                                                                                                                                                                                                                                                                                                                                                                                                                                                                                                           | 4  |
| Figure S2. $^{19}\text{F}\{^1\text{H}\}$ NMR of the crude reaction for <b>1</b> and <b>2</b> .....                                                                                                                                                                                                                                                                                                                                                                                                                                                                                                                                                           | 5  |
| Figure S3. $^1\text{H}$ NMR of <b>1</b> .....                                                                                                                                                                                                                                                                                                                                                                                                                                                                                                                                                                                                                | 5  |
| Figure S4. $^{13}\text{C}\{^1\text{H}\}$ NMR of <b>1</b> .....                                                                                                                                                                                                                                                                                                                                                                                                                                                                                                                                                                                               | 6  |
| Figure S5. $^{19}\text{F}\{^1\text{H}\}$ NMR of <b>1</b> .....                                                                                                                                                                                                                                                                                                                                                                                                                                                                                                                                                                                               | 6  |
| Figure S6. $^{11}\text{B}\{^1\text{H}\}$ NMR of <b>1</b> .....                                                                                                                                                                                                                                                                                                                                                                                                                                                                                                                                                                                               | 7  |
| Figure S7. $^1\text{H}$ NMR of <b>2</b> .....                                                                                                                                                                                                                                                                                                                                                                                                                                                                                                                                                                                                                | 8  |
| Figure S8. $^{13}\text{C}\{^1\text{H}\}$ NMR of <b>2</b> .....                                                                                                                                                                                                                                                                                                                                                                                                                                                                                                                                                                                               | 8  |
| Figure S9. $^{19}\text{F}\{^1\text{H}\}$ NMR of <b>2</b> .....                                                                                                                                                                                                                                                                                                                                                                                                                                                                                                                                                                                               | 9  |
| Figure S10. $^{11}\text{B}\{^1\text{H}\}$ NMR of <b>2</b> .....                                                                                                                                                                                                                                                                                                                                                                                                                                                                                                                                                                                              | 10 |
| Figure S11. $^1\text{H}$ NMR of <b>3</b> .....                                                                                                                                                                                                                                                                                                                                                                                                                                                                                                                                                                                                               | 11 |
| Figure S12. $^{13}\text{C}\{^1\text{H}\}$ NMR of <b>3</b> .....                                                                                                                                                                                                                                                                                                                                                                                                                                                                                                                                                                                              | 11 |
| Figure S13. $^{11}\text{B}\{^1\text{H}\}$ NMR of <b>3</b> .....                                                                                                                                                                                                                                                                                                                                                                                                                                                                                                                                                                                              | 11 |
| Figure S14. $^1\text{H}$ NMR of <b>4</b> .....                                                                                                                                                                                                                                                                                                                                                                                                                                                                                                                                                                                                               | 12 |
| Figure S15. $^{13}\text{C}\{^1\text{H}\}$ NMR of <b>4</b> .....                                                                                                                                                                                                                                                                                                                                                                                                                                                                                                                                                                                              | 13 |
| Figure S16. $^{11}\text{B}\{^1\text{H}\}$ NMR of <b>4</b> .....                                                                                                                                                                                                                                                                                                                                                                                                                                                                                                                                                                                              | 13 |
| Figure S17. POV-Ray depiction of $(\text{C}_{12}\text{H}_8)\text{C}(\text{C}_6\text{F}_5)(\text{B}(\text{C}_6\text{F}_5)_2)$ . The hydrogen atoms are omitted for clarity. C: black, F: pink B: yellow-green.....                                                                                                                                                                                                                                                                                                                                                                                                                                            | 14 |
| Figure S18. $^1\text{H}$ NMR of $(\text{C}_{12}\text{H}_8)\text{C}(\text{C}_6\text{F}_5)(\text{B}(\text{C}_6\text{F}_5)_2)$ .....                                                                                                                                                                                                                                                                                                                                                                                                                                                                                                                            | 14 |
| Figure S19. $^{13}\text{C}\{^1\text{H}\}$ NMR of $(\text{C}_{12}\text{H}_8)\text{C}(\text{C}_6\text{F}_5)(\text{B}(\text{C}_6\text{F}_5)_2)$ .....                                                                                                                                                                                                                                                                                                                                                                                                                                                                                                           | 15 |
| Figure S20. $^{19}\text{F}$ NMR of $(\text{C}_{12}\text{H}_8)\text{C}(\text{C}_6\text{F}_5)(\text{B}(\text{C}_6\text{F}_5)_2)$ .....                                                                                                                                                                                                                                                                                                                                                                                                                                                                                                                         | 15 |
| Figure S21. $^{11}\text{B}\{^1\text{H}\}$ NMR of $(\text{C}_{12}\text{H}_8)\text{C}(\text{C}_6\text{F}_5)(\text{B}(\text{C}_6\text{F}_5)_2)$ .....                                                                                                                                                                                                                                                                                                                                                                                                                                                                                                           | 16 |
| Figure S22. $^{11}\text{B}\{^1\text{H}\}$ NMR of the crude reaction for <b>5</b> , <b>6</b> , and <b>7</b> .....                                                                                                                                                                                                                                                                                                                                                                                                                                                                                                                                             | 17 |
| Figure S23. $^{13}\text{C}\{^1\text{H}\}$ NMR of <b>5</b> .....                                                                                                                                                                                                                                                                                                                                                                                                                                                                                                                                                                                              | 17 |
| Figure S24. $^{11}\text{B}\{^1\text{H}\}$ NMR of <b>5</b> .....                                                                                                                                                                                                                                                                                                                                                                                                                                                                                                                                                                                              | 18 |
| Figure S25. POV-Ray depiction of <b>6</b> . The hydrogen atoms are omitted for clarity. C: black, Cr: green B: yellow-green.....                                                                                                                                                                                                                                                                                                                                                                                                                                                                                                                             | 18 |
| Figure S26. $^1\text{H}$ NMR of <b>8</b> .....                                                                                                                                                                                                                                                                                                                                                                                                                                                                                                                                                                                                               | 19 |
| Figure S27. $^{13}\text{C}\{^1\text{H}\}$ NMR of <b>8</b> .....                                                                                                                                                                                                                                                                                                                                                                                                                                                                                                                                                                                              | 20 |
| Figure S28. $^{19}\text{F}$ NMR of <b>8</b> .....                                                                                                                                                                                                                                                                                                                                                                                                                                                                                                                                                                                                            | 20 |
| Figure S29. Experimental and simulation EPR spectra of the reaction crude for generation of <b>8</b> and <b>9</b> .....                                                                                                                                                                                                                                                                                                                                                                                                                                                                                                                                      | 21 |
| Figure S30. Stacked $^{19}\text{F}$ NMR spectra for the crude reaction comparing with <b>8</b> .....                                                                                                                                                                                                                                                                                                                                                                                                                                                                                                                                                         | 22 |
| Figure S31. The DFT-computed reaction free energy paths in PhCl solution (in kcal/mol, at 298 K and 1 mol/L reference concentration) for the reactions of $\text{Ph}_2\text{CNN}$ with (A) $\text{B}(\text{C}_6\text{F}_5)_3$ and $\text{Cp}^*_2\text{Co}$ ; and (B) $\text{BPh}_3$ and triplet $\text{Cp}^*_2\text{Cr}$ , computed at the PW6B95-D3/def2-QZVP + COSMO-RS // TPSS-D3/def2-TZVP + COSMO level of theory. More detailed energies and brief description of potential reactions are given in Tables S1. Selected bond lengths are given in Å; crucial H, C, N and B atoms are highlighted as white, grey, blue and pink balls, respectively..... | 28 |

## 1. Syntheses

**General Considerations:** All manipulations were performed under an atmosphere of dry, oxygen-free N<sub>2</sub> by means of standard Schlenk or glovebox techniques (Innovative Technology glovebox equipped with a -35 °C freezer). Toluene (tol) and pentane were collected from a Grubbs-type column system manufactured by Innovative Technology, and stored over 4 Å molecular sieves. Molecular sieves, type 4 Å (pellets, 3.2 mm diameter) purchased from Sigma Aldrich were activated prior to usage by iteratively heating with 1050 W Haier microwave for 5 minutes and cooling under vacuum. The process was repeated until no further moisture was released upon heating. Benzene-d<sub>6</sub> (C<sub>6</sub>D<sub>6</sub>), bromobenzene-d<sub>5</sub> (C<sub>6</sub>D<sub>5</sub>Br) and chloroform-d (CDCl<sub>3</sub>), purchased from Cambridge Isotope Laboratories, were degassed and stored over 4 Å molecular sieves in the glovebox for at least 8 h prior to use. Chlorobenzene, dichloromethane-d<sub>2</sub> (CD<sub>2</sub>Cl<sub>2</sub>) and Difluorobenzene (DFB) and benzene were dried by stirring over CaH<sub>2</sub> for several days followed by distillation. Unless otherwise mentioned, chemicals were purchased from Sigma Aldrich, Strem Chemical or TCI. Ph<sub>2</sub>CN<sub>2</sub> and (C<sub>12</sub>H<sub>8</sub>)CN<sub>2</sub> prepared using literature methods.<sup>[1]</sup> NMR Spectra were recorded on a Bruker Avance III 400 MHz, Agilent DD2 500 MHz or an Agilent DD2 600 MHz, spectrometer and spectra were referenced to residual solvents of CD<sub>2</sub>Cl<sub>2</sub> (<sup>1</sup>H = 5.32 ppm and <sup>13</sup>C = 53.84 ppm), C<sub>6</sub>D<sub>6</sub> (<sup>1</sup>H = 7.16 ppm and <sup>13</sup>C = 128.06 ppm) and CDCl<sub>3</sub> (<sup>1</sup>H = 7.26 ppm and <sup>13</sup>C = 77.16 ppm), or externally (<sup>19</sup>F: CFCl<sub>3</sub> and <sup>11</sup>B: (Et<sub>2</sub>O)BF<sub>3</sub>). Chemical shifts (δ) are reported in ppm. In some instances, signal and/or coupling assignments were derived from 2D NMR experiments. Mass spectrometry using a JEOL Accu TOF modelJMS-T1000LC (with DART ion source) were attempted for compound **1** - **4**, **5**, and **8**, however, as all the compounds are highly sensitive to moisture, none satisfied results were obtained, Elemental analysis (C, H, N) were also attempted for the compounds, but results show low on carbon content, while providing satisfactory H and N values. This phenomenon is attributed to the formation of boron carbides during combustion and has been previously reported for other boron compounds.

**Synthesis of [Cp\*<sub>2</sub>Co][(Ph<sub>2</sub>CNNHB(C<sub>6</sub>F<sub>5</sub>)<sub>3</sub>)] (1) and [Cp\*CoC<sub>5</sub>Me<sub>4</sub>CH<sub>2</sub>B(C<sub>6</sub>F<sub>5</sub>)<sub>3</sub>] (2)**

A solution of Ph<sub>2</sub>CN<sub>2</sub> (11.3 mg, 0.058 mmol) in 2 mL of pentane was stirred in a vial at -35 °C, while B(C<sub>6</sub>F<sub>5</sub>)<sub>3</sub> (59.3 mg, 0.116 mmol) and Cp\*<sub>2</sub>Co (38.2 mg, 0.116 mmol) were added sequentially, resulting a yellow solid immediately crashed out from the solution. The solvent was decanted carefully with a pipette, and the resulting solid was washed with 3 × 2 mL of pentane. Clean compound **2** was extracted from the crude product with 3 × 2 mL of benzene, and dried as yellow powder (16.5 mg Yield 34%), while the residue was dried to give the clean compound **1** as yellow powder (34.0 mg, Yield 57%).

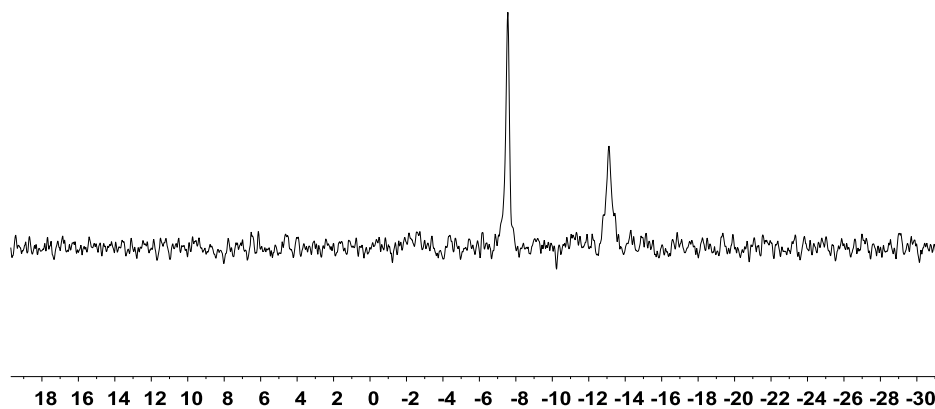

**Figure S1.** <sup>11</sup>B{<sup>1</sup>H} NMR of the crude reaction for **1** and **2**.

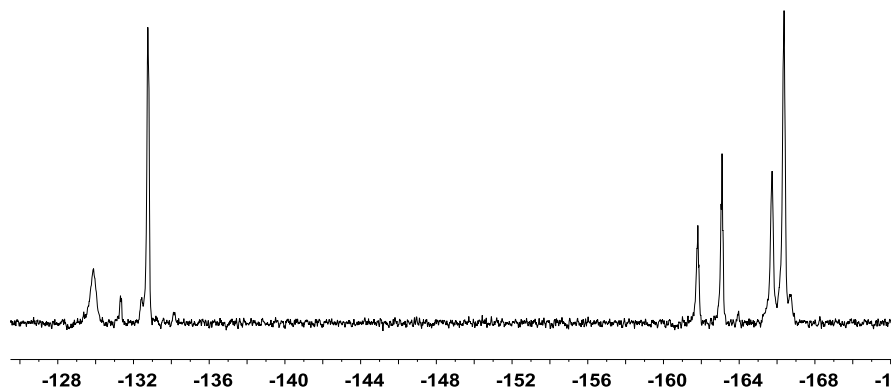

**Figure S2.**  $^{19}\text{F}\{^1\text{H}\}$  NMR of the crude reaction for **1** and **2**.

Single crystals for X-ray studies were obtained from slow evaporation of a pentane into a saturated chlorobenzene solution for **1** and a saturated benzene solution for **2** at room temperature to give yellow crystals.

For **1**:

$^1\text{H}$  NMR (500MHz,  $\text{CD}_2\text{Cl}_2$ , 298 K, pentane omitted):  $\delta$  7.52 (t, 2H,  $-\text{C}_6\text{H}_5$ ,  $^3J_{\text{HH}} = 7.5$  Hz), 7.40 (t, 1H,  $-\text{C}_6\text{H}_5$ ,  $^3J_{\text{HH}} = 7.5$  Hz), 7.35 – 7.28 (m, 2H,  $-\text{C}_6\text{H}_5$ ), 7.14 – 7.01 (m, 4H,  $-\text{C}_6\text{H}_5$ ), 6.94 (t, 1H,  $-\text{C}_6\text{H}_5$ ,  $^3J_{\text{HH}} = 6.7$  Hz), 6.61(s, br, 1H,  $-\text{NH}-$ ), 1.70 (s, 30H,  $-\text{CH}_3$ ).  $^{13}\text{C}\{^1\text{H}\}$  NMR (128 MHz,  $\text{CD}_2\text{Cl}_2$ , 298 K):  $\delta$  142.1, 135.9, 130.8, 130.2, 129.4, 129.3, 128.9, 128.6, 127.9, 127.7, 126.9, 124.7, 124.6, 94.4 ( $\text{C}-\text{CH}_3$ ), 8.2 ( $-\text{CH}_3$ ).  $^{19}\text{F}\{^1\text{H}\}$  NMR ( $\text{C}_6\text{D}_5\text{Br}$ , 377 MHz, 298 K):  $\delta$  -134.0 (d, 6F,  $o-\text{C}_6\text{F}_5$ ,  $^3J_{\text{FF}} = 24$  Hz), -163.9 (t, 3F,  $p-\text{C}_6\text{F}_5$ ,  $^3J_{\text{FF}} = 21$  Hz), -167.3 (t, 6F,  $m-\text{C}_6\text{F}_5$ ,  $^3J_{\text{FF}} = 22$  Hz).  $^{11}\text{B}\{^1\text{H}\}$  NMR ( $\text{C}_6\text{D}_5\text{Br}$ , 128 MHz, 298 K):  $\delta$  -7.6.

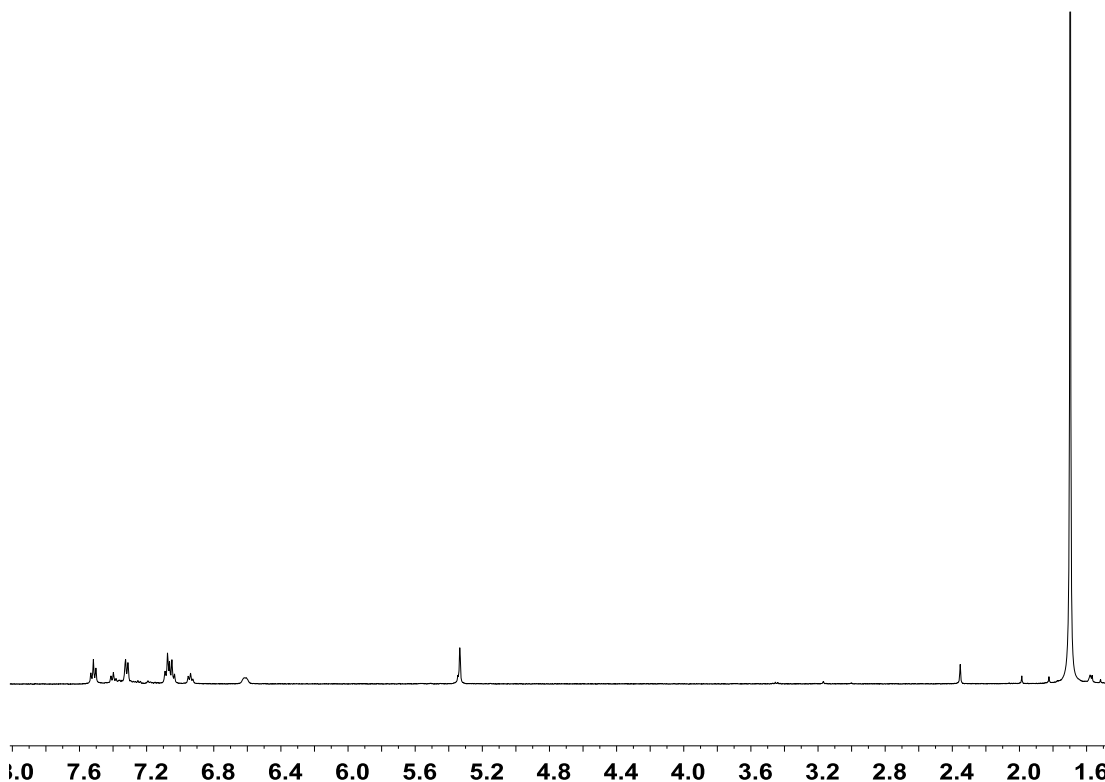

**Figure S3.**  $^1\text{H}$  NMR of **1**

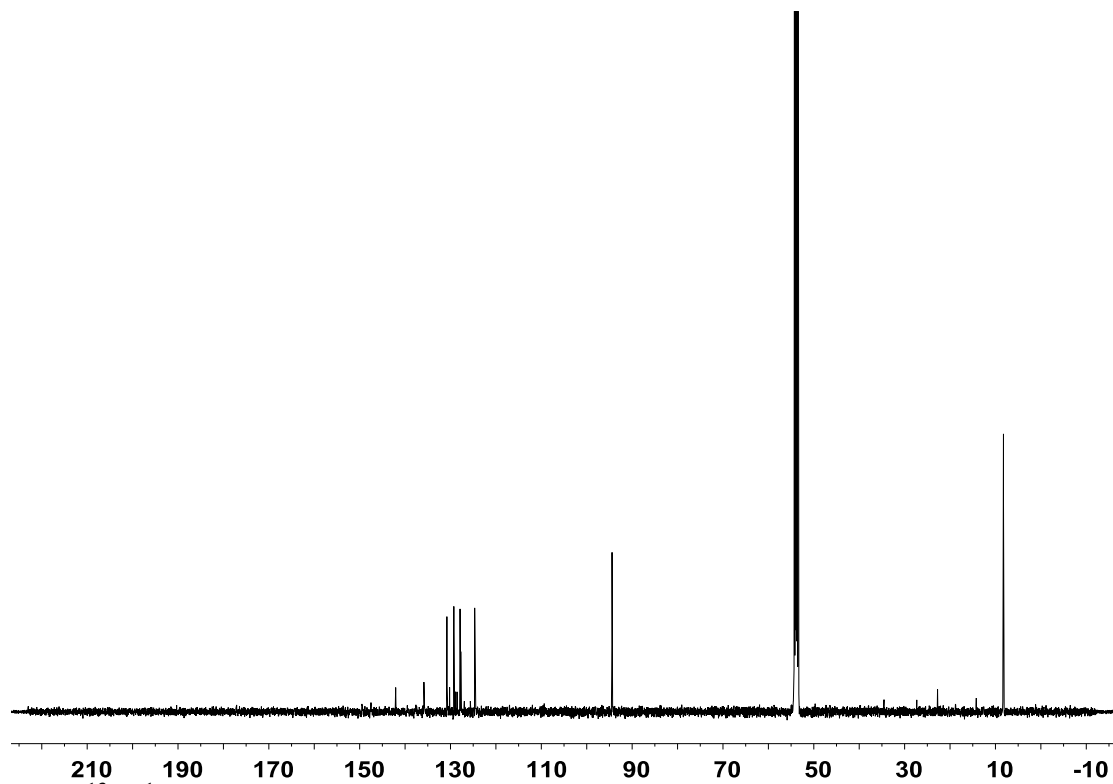

Figure S4.  $^{13}\text{C}\{^1\text{H}\}$  NMR of **1**

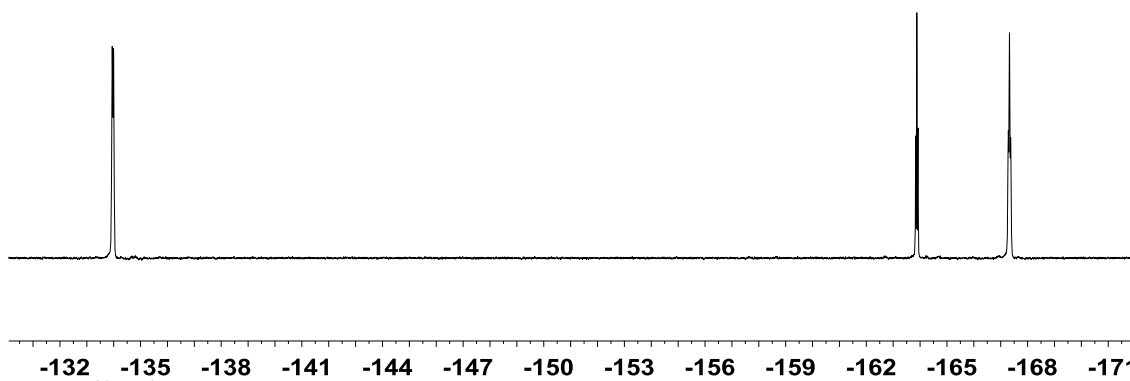

Figure S5.  $^{19}\text{F}\{^1\text{H}\}$  NMR of **1**

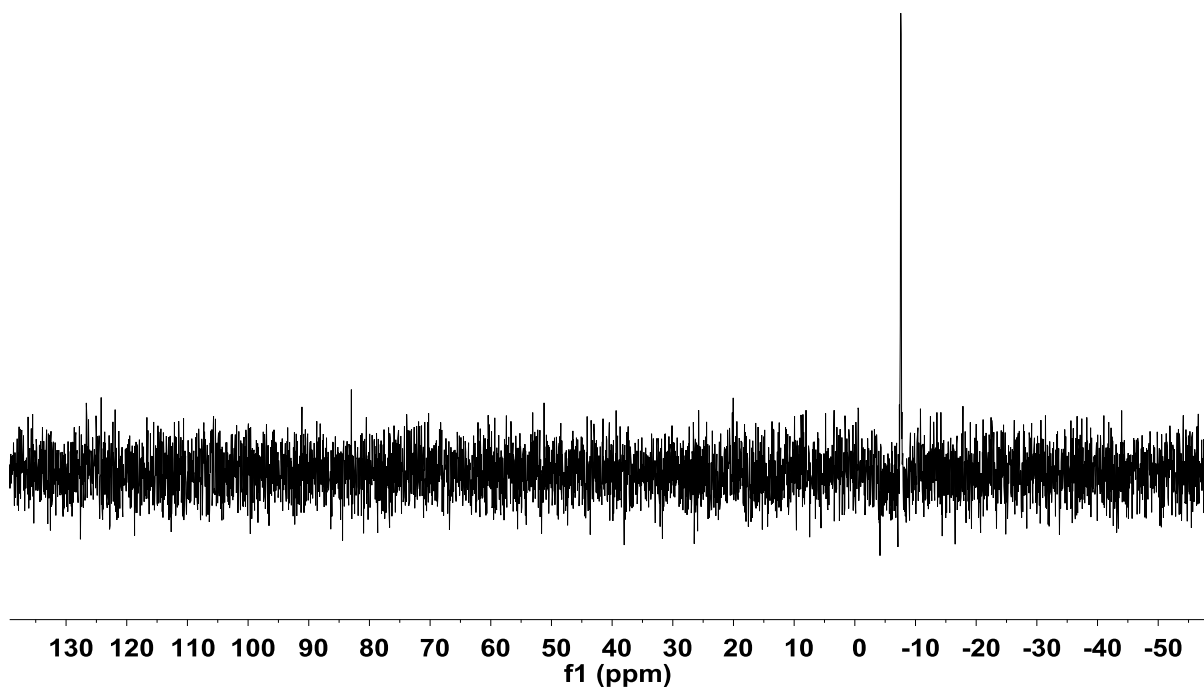

**Figure S6.**  $^{11}\text{B}\{^1\text{H}\}$  NMR of **1**

For **2**:

$^1\text{H}$  NMR (400MHz,  $\text{C}_6\text{D}_6$ , 298 K, pentane omitted):  $\delta$  2.43 (s, br, 2H,  $\text{CH}_2\text{-B}$ ), 0.88 (s, 10H,  $-\text{CH}_3$ ), 0.79 (s, 6H,  $-\text{CH}_3$ ) 0.67 (s, 6H,  $-\text{CH}_3$ ).  $^{13}\text{C}\{^1\text{H}\}$  NMR (128 MHz,  $\text{C}_6\text{D}_6$ , 298 K):  $\delta$  93.1, 92.3, 91.9, 91.7, 7.1 ( $-\text{CH}_3$ ), 6.8 ( $-\text{CH}_3$ ), 6.7 ( $-\text{CH}_3$ ), 6.6 ( $-\text{CH}_3$ ).  $^{19}\text{F}\{^1\text{H}\}$  NMR ( $\text{C}_6\text{D}_6$ , 377 MHz, 298 K):  $\delta$  -130.2 (s, br, 6F,  $o\text{-C}_6\text{F}_5$ ), -161.9 (t, 3F,  $p\text{-C}_6\text{F}_5$ ,  $^3J_{\text{FF}} = 26$  Hz), -162.7 (s, br, 6F,  $m\text{-C}_6\text{F}_5$ ).  $^{11}\text{B}\{^1\text{H}\}$  NMR ( $\text{C}_6\text{D}_6$ , 128 MHz, 298 K):  $\delta$  -13.0.



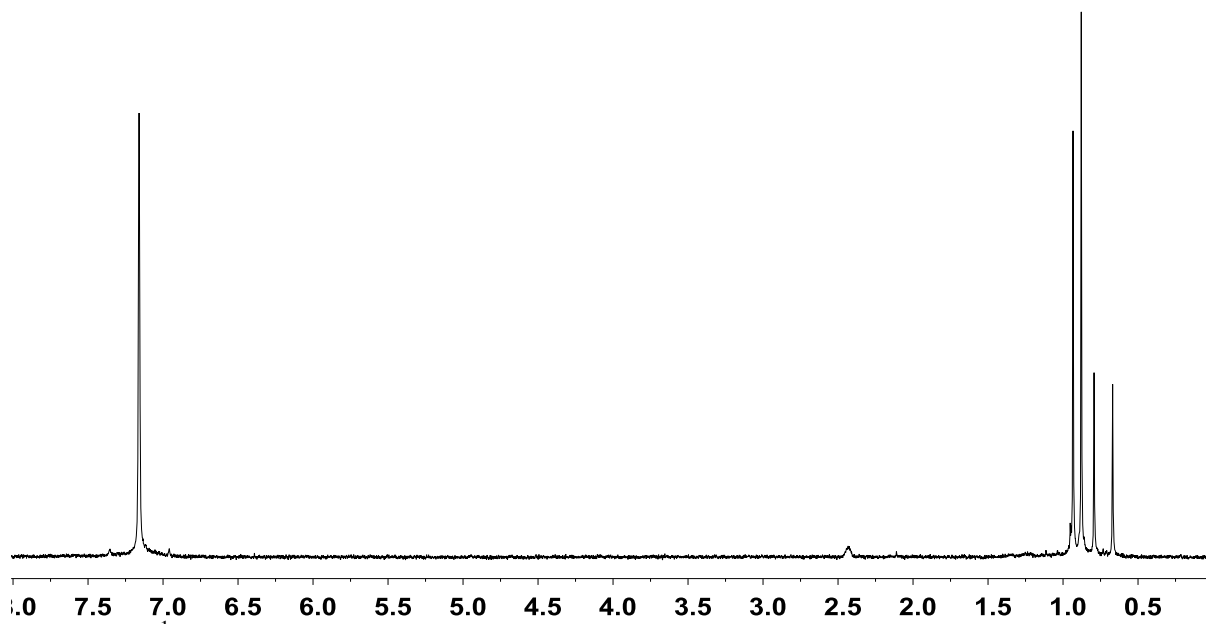

Figure S7.  $^1\text{H}$  NMR of **2**

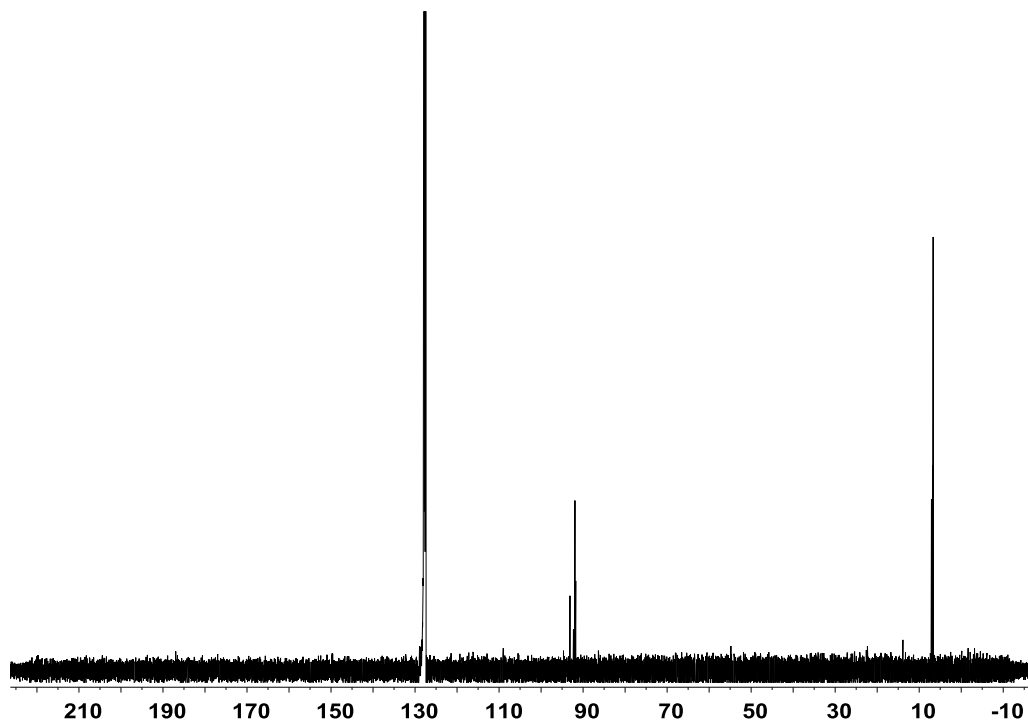

Figure S8.  $^{13}\text{C}\{^1\text{H}\}$  NMR of **2**

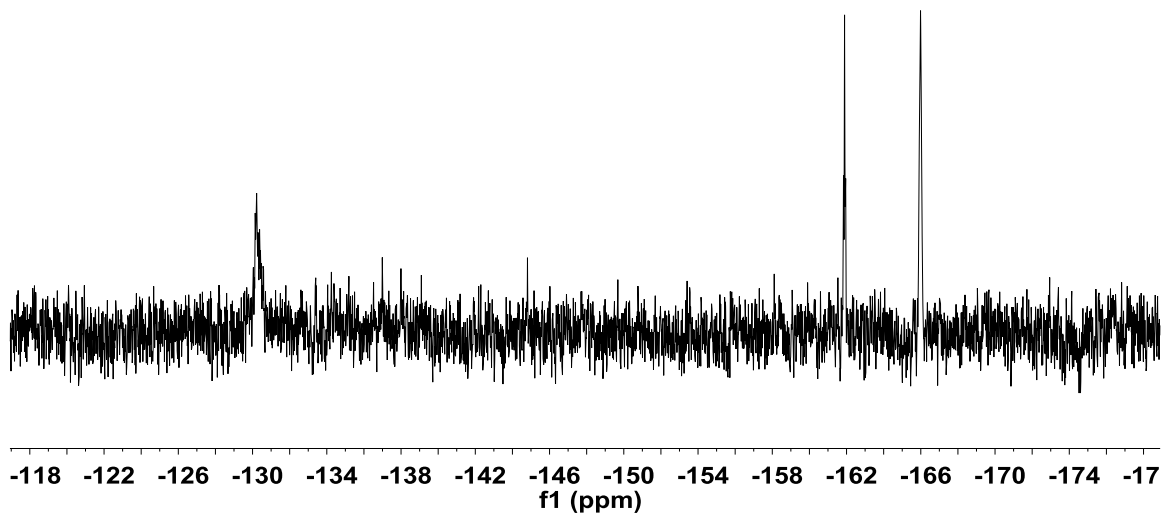

Figure S9.  $^{19}\text{F}\{^1\text{H}\}$  NMR of 2

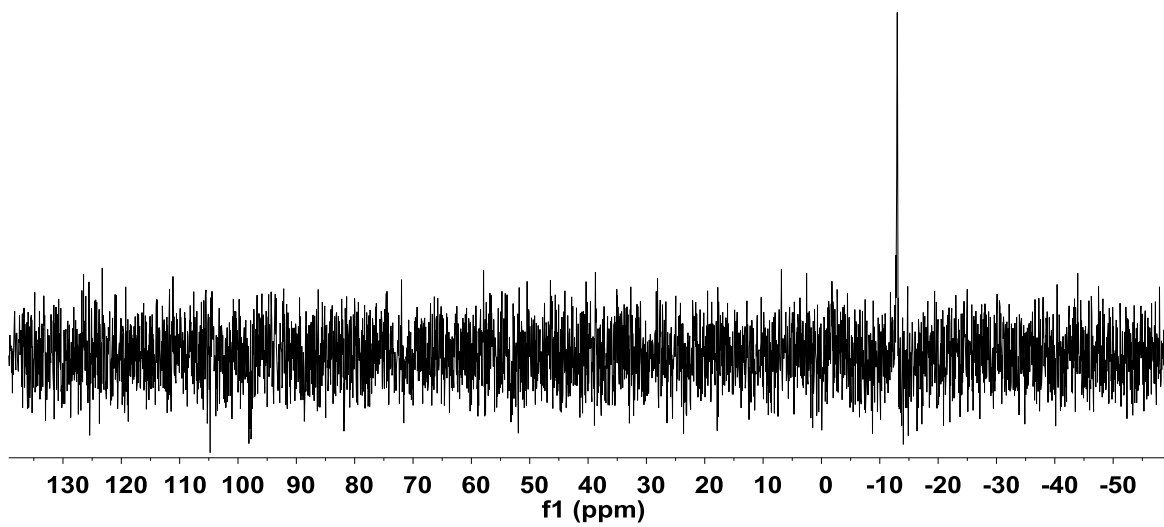

S9

**Figure S10.**  $^{11}\text{B}\{^1\text{H}\}$  NMR of **2**

**Synthesis of  $[\text{Cp}^*_2\text{Cr}][(\text{PhC}(\text{C}_6\text{H}_4)\text{NNBPh}_3)$  (**3**) and  $[\text{Cp}^*_2\text{Cr}][\text{Ph}_2\text{CNNHBPh}_3]$  (**4**)**

A solution of  $\text{Ph}_2\text{CN}_2$  (55.4 mg, 0.285 mmol) in 2 mL of chlorobenzene was stirred in a vial at  $-35^\circ\text{C}$ , while  $\text{BPh}_3$  (69.1 mg, 0.285 mmol) and  $\text{Cp}^*_2\text{Cr}$  (92.0 mg, 0.285 mmol) were added sequentially, resulting an orange solid started to crashed out from the solution. The reaction mixture was allowed to further stir for another 2 h at room temperature to ensure the reaction is fully completed. The solvent was removed under vacuum, and the resulting solid was washed with 6 mL of pentane, and extracted with  $3 \times 2$  mL of benzene and dried in *vacuo*. The yield orange solid was further washed with  $3 \times 2$  mL of pentane and dried in *vacuo* to give clean compound **3** (45.6 mg, Yield 42%). The resulting leftover solid after extraction of compound **3** was further washed with 2 mL of chlorobenzene and  $3 \times 2$  mL of pentane, and dried in *vacuo* to give compound **4** (54.2 mg, Yield 50%)

Single crystals for X-ray studies were obtained from slow evaporation of a pentane into a saturated chlorobenzene solution for **3** and a saturated DFB solution of **4** at room temperature to give orange crystals.

For **3**:

$^1\text{H}$  NMR (400MHz,  $\text{C}_6\text{D}_6$ , 298 K, pentane and toluene are omitted):  $\delta$  21.35 (s, br, 30H,  $-\text{CH}_3$ ), 8.44 - 7.09(m, br, 24H), 5.88 (s, br, 2H), 5.07 (s, br, 2H).  $^{13}\text{C}\{^1\text{H}\}$  NMR (128 MHz,  $\text{C}_6\text{D}_6$ , 298 K, partial due to the paramagnetic cation  $\text{Cp}^*_2\text{Cr}$ , pentane omitted):  $\delta$  143.1, 138.4, 117.6.  $^{11}\text{B}\{^1\text{H}\}$  NMR ( $\text{C}_6\text{D}_5\text{Br}$ , 128 MHz, 298 K):  $\delta$  23.1.

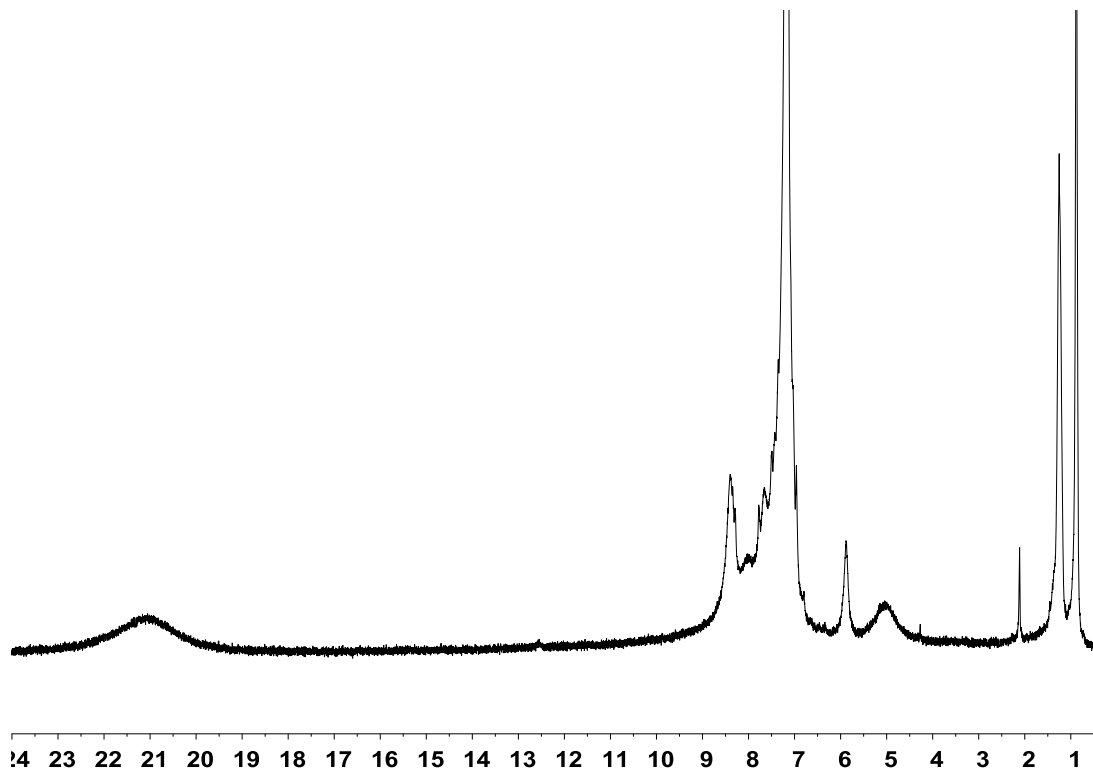

**Figure S11.**  $^1\text{H}$  NMR of **3**

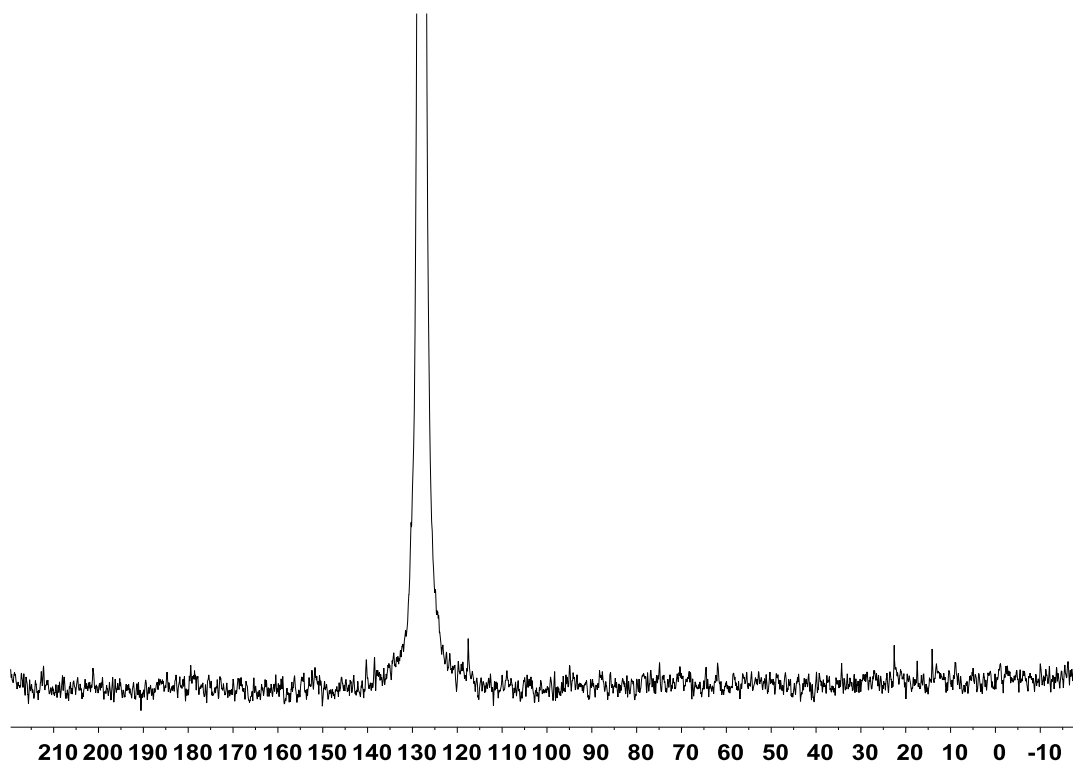

**Figure S12.**  $^{13}\text{C}\{^1\text{H}\}$  NMR of **3**

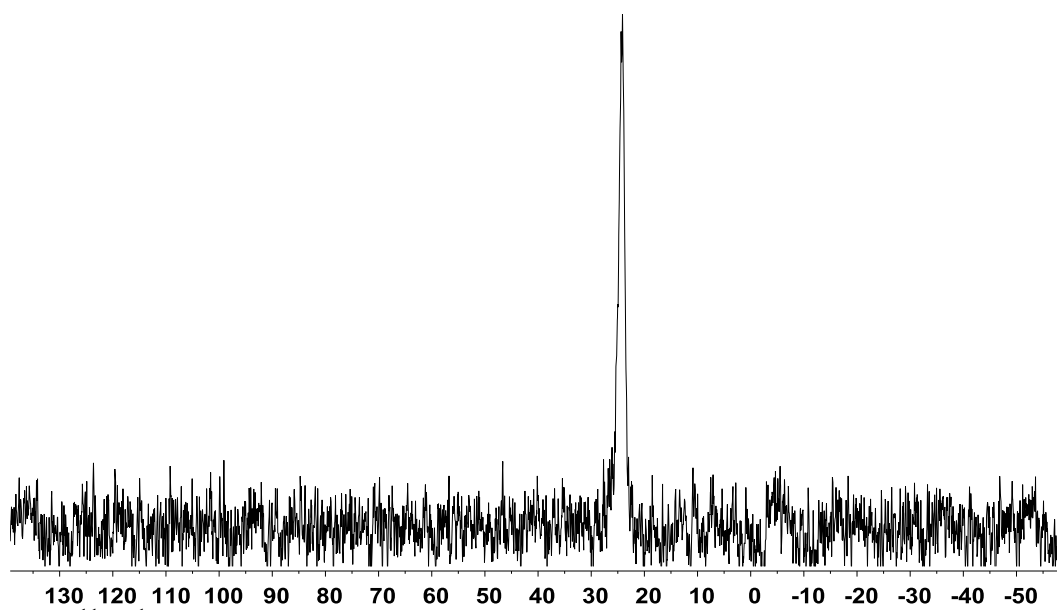

**Figure S13.**  $^{11}\text{B}\{^1\text{H}\}$  NMR of **3**

For **4**:

$^1\text{H}$  NMR (400MHz,  $\text{CDCl}_3$ , 298 K, pentane and toluene are omitted):  $\delta$  20.51 (s, br, 30H,  $-\text{CH}_3$ ), 8.23 - 6.41(m, br, 25H), 3.42 (m, br, 1H,  $-\text{NH}-$ ).  $^{13}\text{C}\{^1\text{H}\}$  NMR (128 MHz,  $\text{CDCl}_3$ , 298 K):  $\delta$  135.0, 134.6, 132.8, 132.4, 130.8, 129.2, 128.8, 128.5, 128.4, 126.8, 126.6, 126.0, 125.5, 125.2, 123.3, 121.8.  $^{11}\text{B}\{^1\text{H}\}$  NMR ( $\text{CDCl}_3$ , 128 MHz, 298 K):  $\delta$  -3.7.

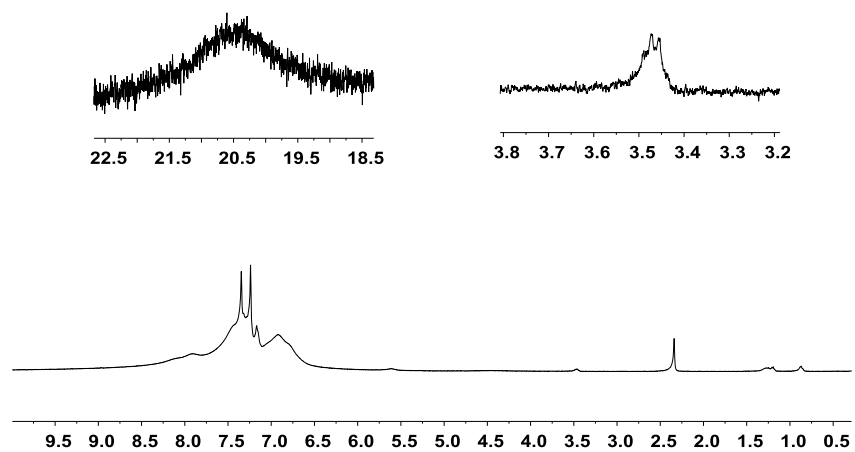

Figure S14.  $^1\text{H}$  NMR of **4**

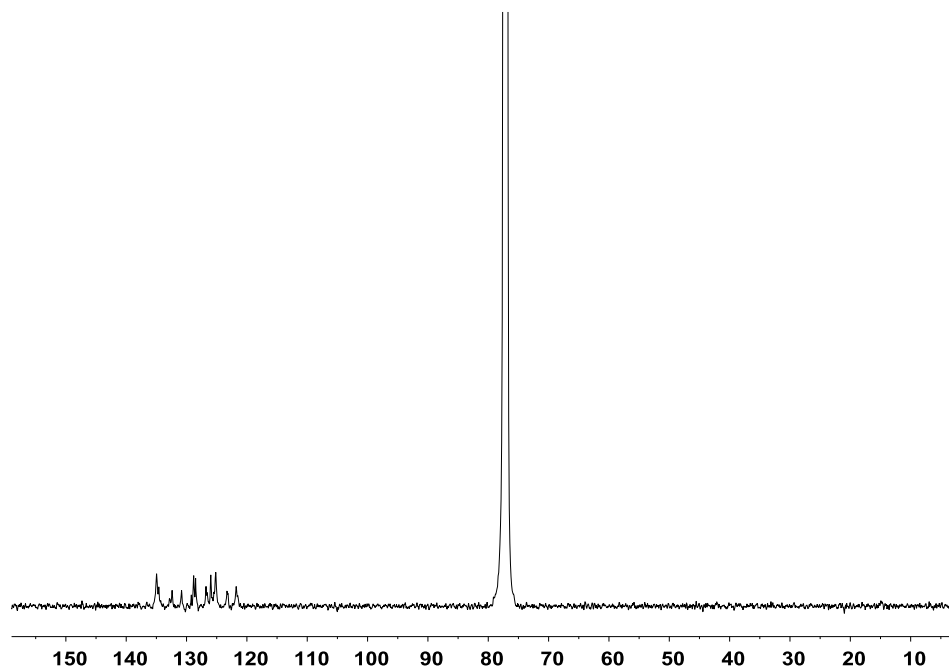

**Figure S15.**  $^{13}\text{C}\{^1\text{H}\}$  NMR of **4**

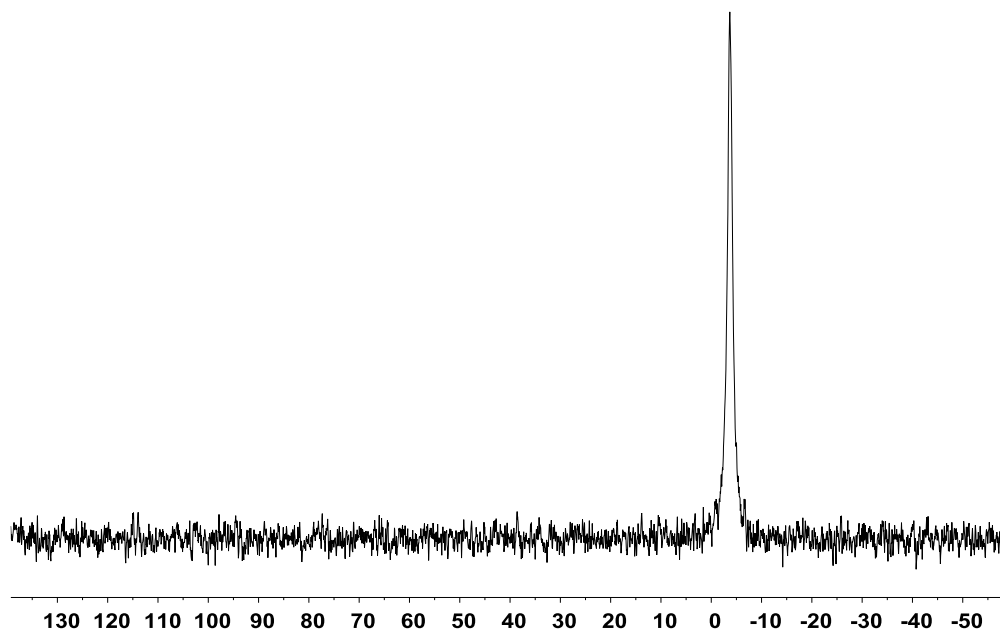

**Figure S16.**  $^{11}\text{B}\{^1\text{H}\}$  NMR of **4**

**Synthesis of  $(\text{C}_{12}\text{H}_8)\text{C}(\text{C}_6\text{F}_5)(\text{B}(\text{C}_6\text{F}_5)_2)$**

A solution of  $\text{B}(\text{C}_6\text{F}_5)_3$  (94.3 mg, 0.184 mmol) in 2 mL of pentane was added slowly to a solution of  $(\text{C}_{12}\text{H}_8)\text{CN}_2$  (35.4 mg, 0.184 mmol) in 2 mL of pentane. The solution was then stored in a  $-35\text{ }^\circ\text{C}$  freezer for one days to give colorless crystals, which is suitable for diffraction study. The crystals was then washed with  $-35\text{ }^\circ\text{C}$  pentane ( $3 \times 2\text{ mL}$ ) to give clean  $(\text{C}_{12}\text{H}_8)\text{C}(\text{C}_6\text{F}_5)(\text{B}(\text{C}_6\text{F}_5)_2)$  (67.8 mg, 54 %).

**$^1\text{H}$  NMR** (400MHz,  $\text{C}_6\text{D}_6$ , 298 K):  $\delta$  7.63 (d,  $^3J_{\text{HH}} = 7.3\text{ Hz}$ , 2H), 7.32 (d,  $^3J_{\text{HH}} = 7.1\text{ Hz}$ , 2H), 7.11 (pd,  $^4J_{\text{HH}} = 1.5\text{ Hz}$ ,  $^3J_{\text{HH}} = 7.4\text{ Hz}$ , 4H).  **$^{13}\text{C}\{^1\text{H}\}$  NMR** (128 MHz,  $\text{C}_6\text{D}_6$ , 298 K):  $\delta$  147.3 (d,  $^1J_{\text{CF}} = 244\text{ Hz}$ ,  $\text{C}_6\text{F}_5$ ), 144.1 (s,  $\text{C}_{12}\text{H}_8$ ), 142.9 (d,  $^1J_{\text{CF}} = 254\text{ Hz}$ ,  $\text{C}_6\text{F}_5$ ), 142.5 (s,  $\text{C}_{12}\text{H}_8$ ), 141.2 (s,  $\text{C}_{12}\text{H}_8$ ), 139.6 (d,  $^1J_{\text{CF}} = 244\text{ Hz}$ ,  $\text{C}_6\text{F}_5$ ), 137.8 (d,  $^1J_{\text{CF}} = 240\text{ Hz}$ ,  $\text{C}_6\text{F}_5$ ), 137.0 (d,  $^1J_{\text{CF}} = 254\text{ Hz}$ ,  $\text{C}_6\text{F}_5$ ), 129.6 (s,  $\text{C}_{12}\text{H}_8$ ), 127.0 (s,  $\text{C}_{12}\text{H}_8$ ), 124.0 (s,  $\text{C}_{12}\text{H}_8$ ), 120.4 (s,  $\text{C}_{12}\text{H}_8$ ), 57.8 (s,  $\text{C}(\text{C}_6\text{F}_5)(\text{B}(\text{C}_6\text{F}_5)_2)$ ).  **$^{19}\text{F}$  NMR** (377 MHz,  $\text{C}_6\text{D}_6$ , 298K):  $\delta$  -125.6 (s, br, 6F), -137.2 (s, br, 1F), -146.6 (s, br, 2F), -155.2 (t,  $^3J_{\text{FF}} = 22\text{ Hz}$ , 2F), -161.4 (s, 4F).  **$^{11}\text{B}\{^1\text{H}\}$  NMR** (128 MHz,  $\text{C}_6\text{D}_6$ , 298 K):  $\delta$  61.6 (s, br).

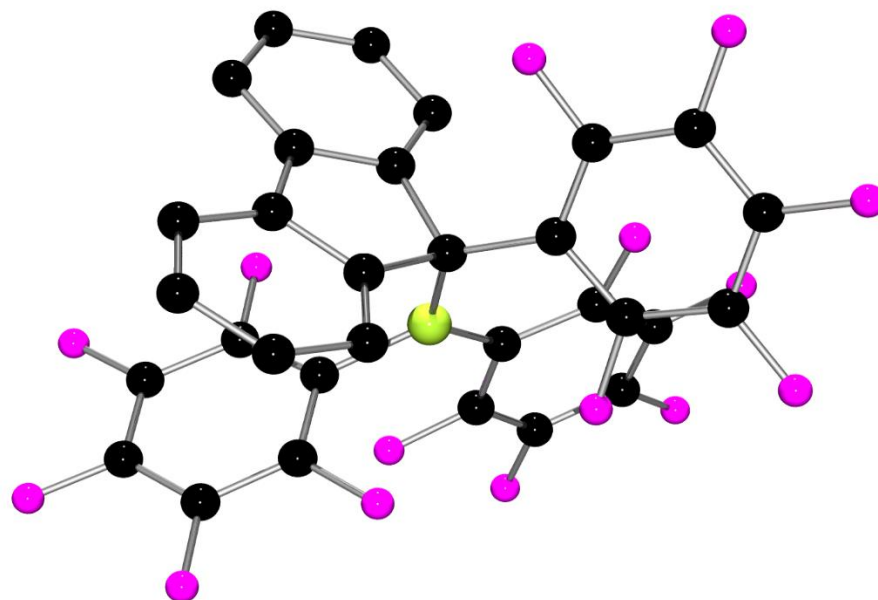

**Figure S17.** POV-Ray depiction of  $(C_{12}H_8)C(C_6F_5)(B(C_6F_5)_2)$ . The hydrogen atoms are omitted for clarity. C: black, F: pink B: yellow-green.

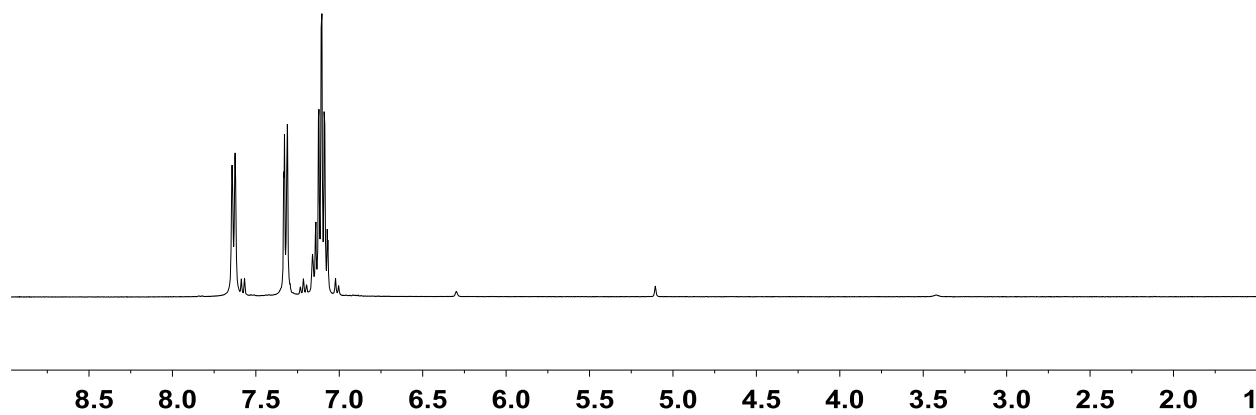

**Figure S18.**  $^1H$  NMR of  $(C_{12}H_8)C(C_6F_5)(B(C_6F_5)_2)$ .

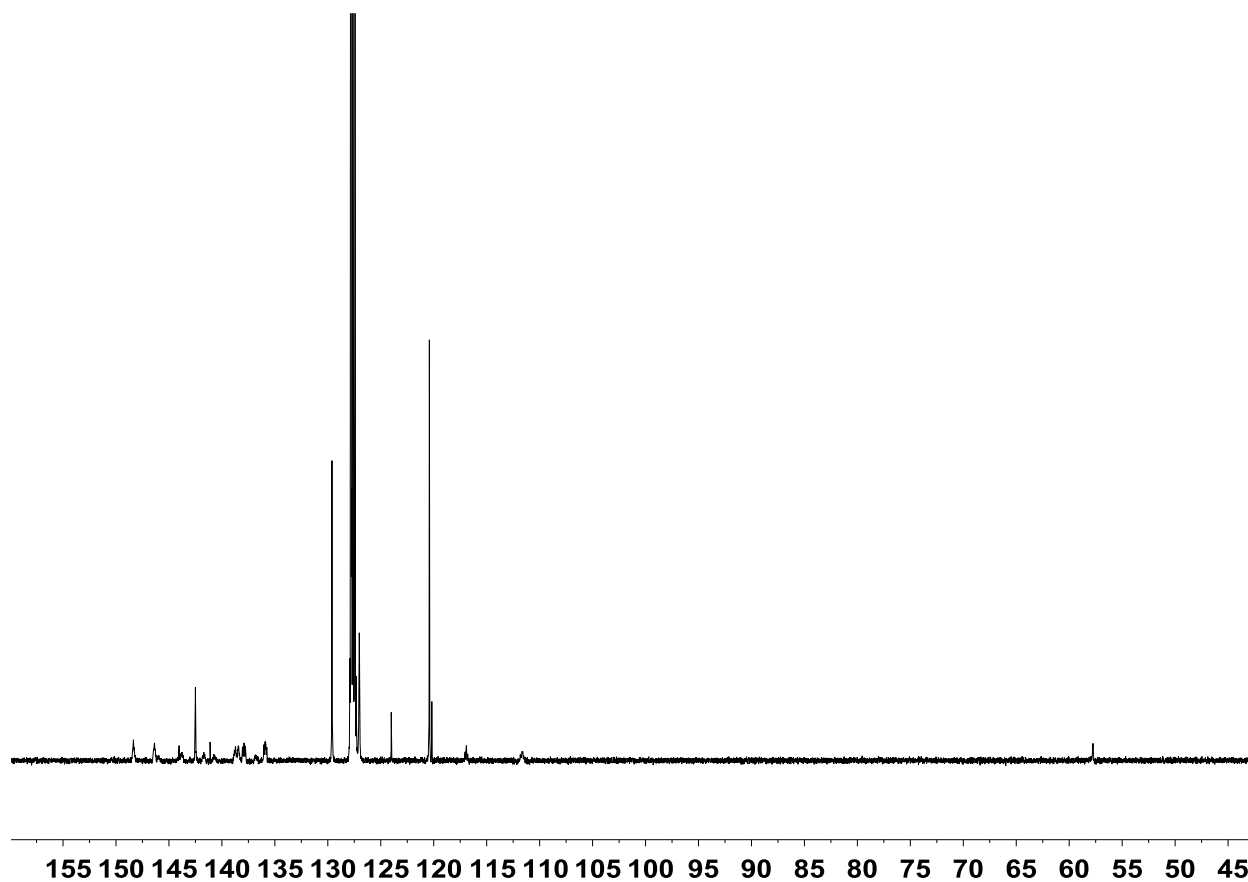

**Figure S19.**  $^{13}\text{C}\{^1\text{H}\}$  NMR of  $(\text{C}_{12}\text{H}_8)\text{C}(\text{C}_6\text{F}_5)(\text{B}(\text{C}_6\text{F}_5)_2)$ .

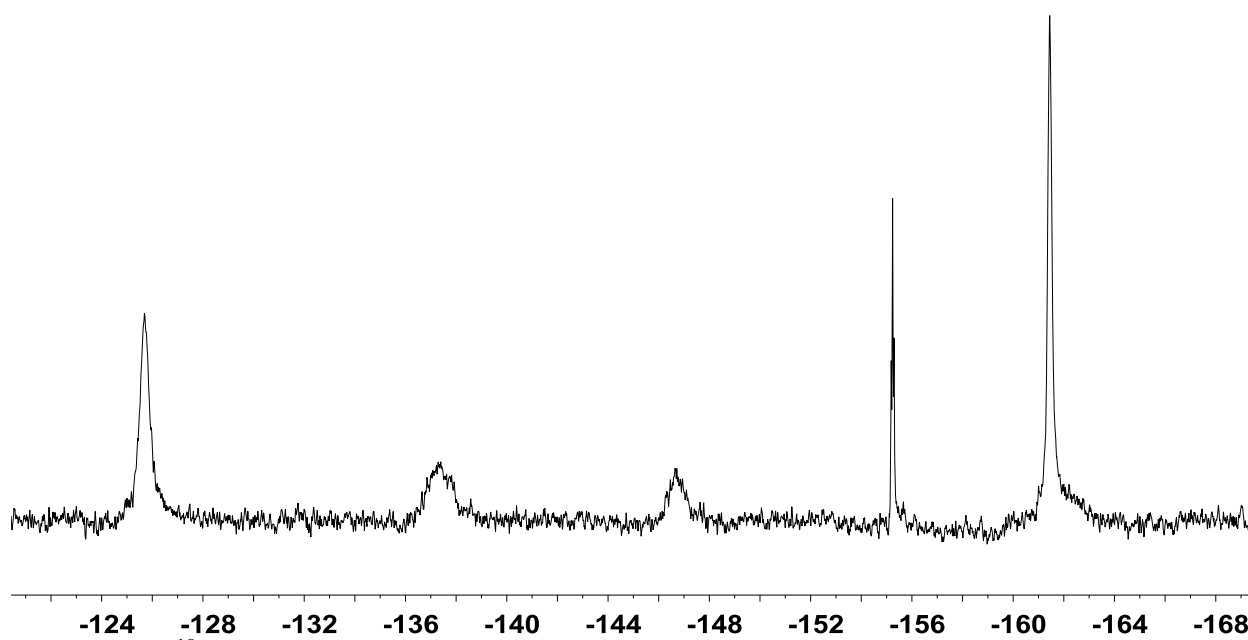

**Figure S20.**  $^{19}\text{F}$  NMR of  $(\text{C}_{12}\text{H}_8)\text{C}(\text{C}_6\text{F}_5)(\text{B}(\text{C}_6\text{F}_5)_2)$ .



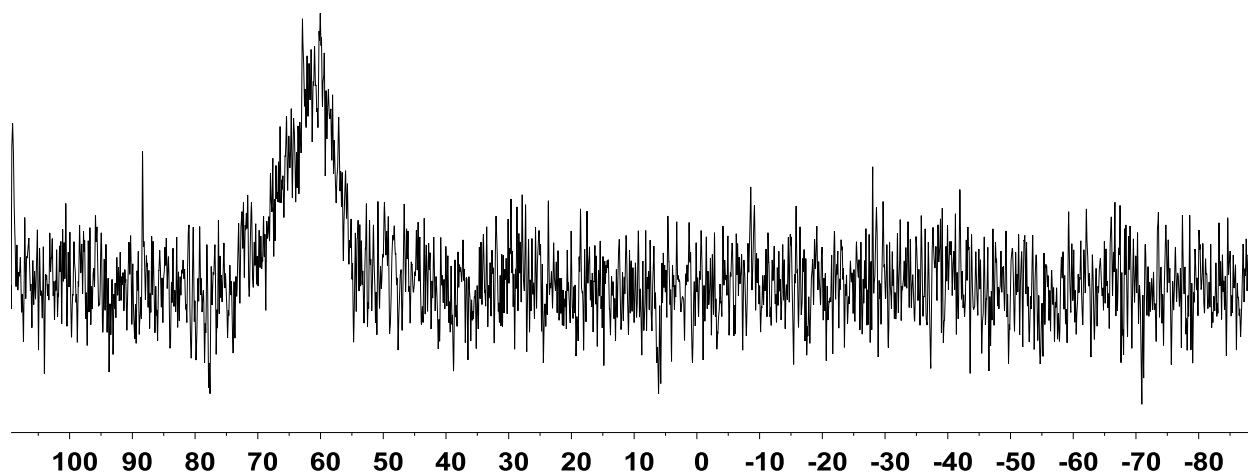

**Figure S21.**  $^{11}\text{B}\{^1\text{H}\}$  NMR of  $(\text{C}_{12}\text{H}_8)\text{C}(\text{C}_6\text{F}_5)(\text{B}(\text{C}_6\text{F}_5)_2)$ .

**Generation of  $[\text{Cp}^*_2\text{Cr}][\text{C}_{12}\text{H}_8\text{CNNHBPh}_3]$  (**5**),  $[\text{Cp}^*_2\text{Cr}][\text{C}_{13}\text{H}_7\text{N}_2(\text{BPh}_3)]$  (**6**) and  $[\text{Cp}^*\text{Cr}(\text{C}_5\text{Me}_4\text{CH}_2\text{BPh}_3)]$  (**7**)**

A solution of  $(\text{C}_{12}\text{H}_8)\text{CN}_2$  (54.7 mg, 0.285 mmol) in 2 mL of chlorobenzene was stirred in a vial at  $-35\text{ }^\circ\text{C}$ , while  $\text{BPh}_3$  (69.1 mg, 0.285 mmol) and  $\text{Cp}^*_2\text{Cr}$  (92.0 mg, 0.285 mmol) were added sequentially, resulting in the precipitation of an orange solid. The reaction mixture was allowed to further stir for another 2 h at room temperature to ensure the reaction is fully completed. The solid was filtered and further washed with  $3 \times 2\text{ mL}$  of  $\text{C}_6\text{H}_5\text{Cl}$  and  $3 \times 2\text{ mL}$  of pentane and dried under vacuum to give crude compound of **5**. The solvent used to wash **5** were collected and removed under vacuum. The resulting solid was dissolved in  $\text{C}_6\text{H}_5\text{Cl}$  and layered with pentane at room temperature to give a mixture of crystals for **5** and **7** suitable for diffraction study. Single crystals suitable for X-ray studies for **5** were obtained from a saturated DFB solution layered with pentane at room temperature (56 mg 52 %), while clean **6** and **7**, were not isolated in pure form due to their similar solubilities.

For **5**:

$^1\text{H}$  NMR (400MHz,  $\text{CDCl}_3$ , 298 K,): signals were broad due to the paramagnetic  $[\text{Cp}^*_2\text{Cr}]^+$  cation, and low solubility of **5**.  $^{13}\text{C}\{^1\text{H}\}$  NMR (128 MHz,  $\text{CDCl}_3$ , 298 K, partial data due to

solubility of **5**, and the paramagnetic  $[\text{Cp}^*_2\text{Cr}]^+$  cation):  $\delta$  160.3, 135.9, 132.2, 131.1, 129.7, 128.9.  $^{11}\text{B}\{^1\text{H}\}$  NMR ( $\text{CDCl}_3$ , 128 MHz, 298 K):  $\delta$  -1.7.

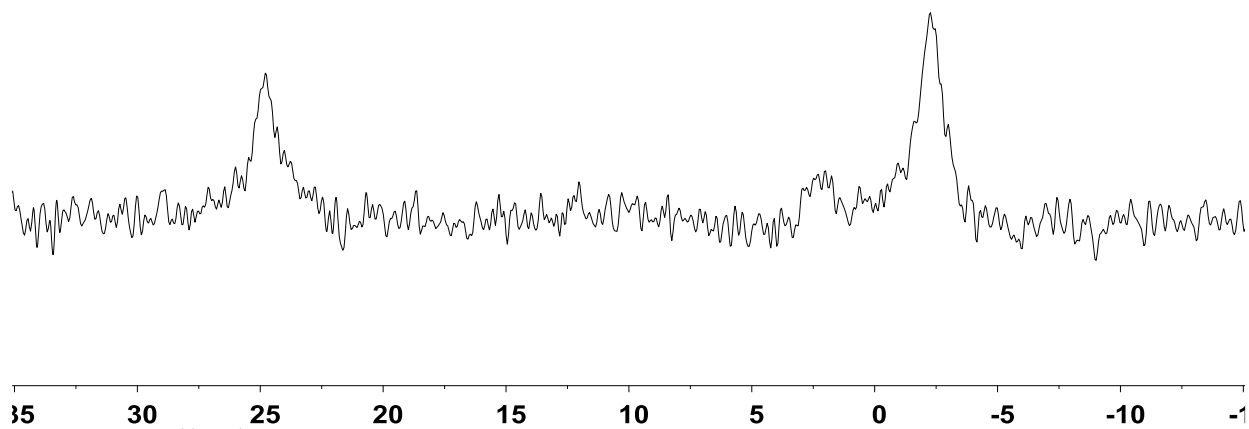

**Figure S22.**  $^{11}\text{B}\{^1\text{H}\}$  NMR of the crude reaction for **5**, **6**, and **7**.

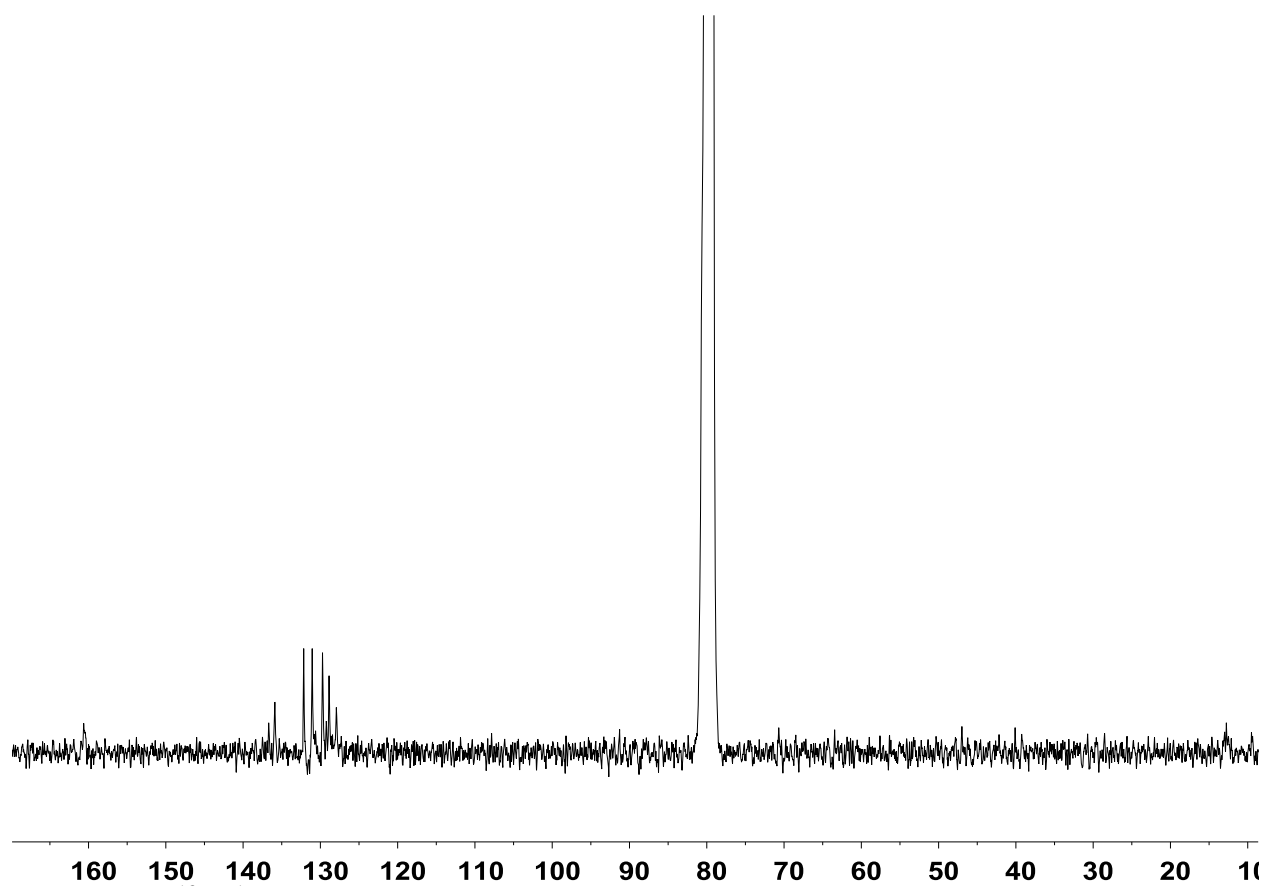

**Figure S23.**  $^{13}\text{C}\{^1\text{H}\}$  NMR of **5**.

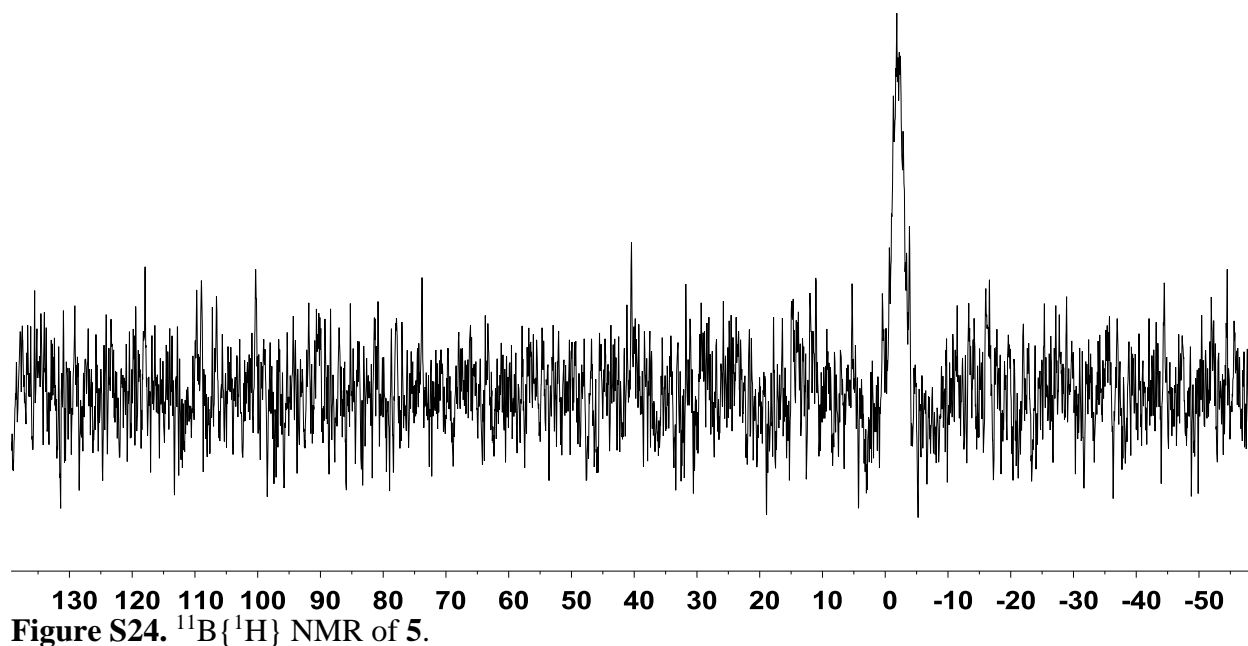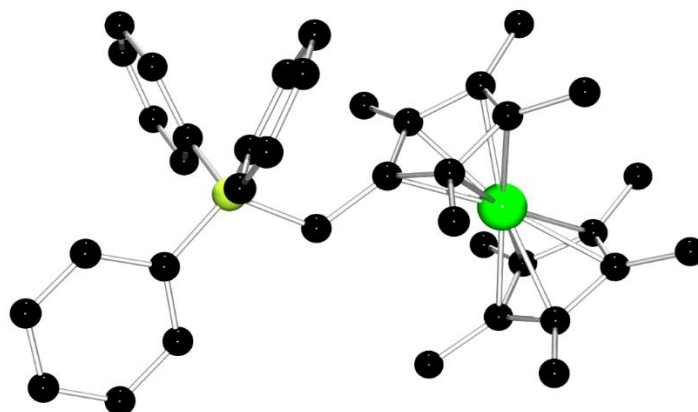

**Figure S25.** POV-Ray depiction of **6**. The hydrogen atoms are omitted for clarity. C: black, Cr: green B: yellow-green.

#### Synthesis of $[\text{Cp}^*_2\text{Fe}][\text{C}_{12}\text{H}_8\text{CNNH}(\text{Al}(\text{C}_6\text{F}_5)_3)]$ (**8**)

A solution of  $\text{Al}(\text{C}_6\text{F}_5)_3$  (27.8 mg, 0.0927 mmol) and  $\text{Cp}^*_2\text{Fe}$  (30.3 mg, 0.0927 mmol) in 1 mL of  $\text{C}_6\text{H}_5\text{Cl}$  was added slowly to a solution of  $(\text{C}_{12}\text{H}_8)\text{CNNH}_2$  (18.0 mg, 0.0927 mmol) in 1 mL of  $\text{C}_6\text{H}_5\text{Cl}$ . The solution immediately turned from light yellow to deep green. After stirring at room temperature for 30 min, 6 mL of pentane was added to give green precipitate. The solvent was then carefully decanted with a pipette, and the solid was further washed with  $3 \times 2$  mL of pentane and dried *in vacuo*. Crystals suitable for X-ray studies were obtained from slow diffusion of pentane into a saturated DFB solution of **8** (42 mg, 43 %).

**$^1\text{H}$  NMR** (400MHz,  $\text{C}_6\text{D}_5\text{Br}$ , 298 K, signals were broad due to the paramagnetic  $[\text{Cp}^*_2\text{Fe}]^+$  cation, and low solubility of **8**):  $\delta$  29.5 (s, br, 30H,  $\text{CH}_3$ ), 11.98 – 6.01 (m, br, 9H).  **$^{13}\text{C}\{^1\text{H}\}$  NMR** (128 MHz,  $\text{C}_6\text{D}_6$ , 298 K, partial data due to solubility of **8**, and the paramagnetic  $[\text{Cp}^*_2\text{Fe}]^+$  cation):  $\delta$  154.6 (d,  $^1J_{\text{CF}} = 235$  Hz,  $\text{C}_6\text{F}_5$ ), 150.7 (d,  $^1J_{\text{CF}} = 241$  Hz,  $\text{C}_6\text{F}_5$ ), 136.2 (d,  $^1J_{\text{CF}} = 251$  Hz,  $\text{C}_6\text{F}_5$ ).  **$^{19}\text{F}$  NMR** (377 MHz,  $\text{C}_6\text{D}_6$ , 298K):  $\delta$  -122.2 (s, br, 6F), -154.3 (s, br, 3F), -162.0 (s, br, 6F).  **$^{27}\text{Al}\{^1\text{H}\}$  NMR** (104 MHz,  $\text{C}_6\text{D}_5\text{Br}$ , 298 K): no signal detected.

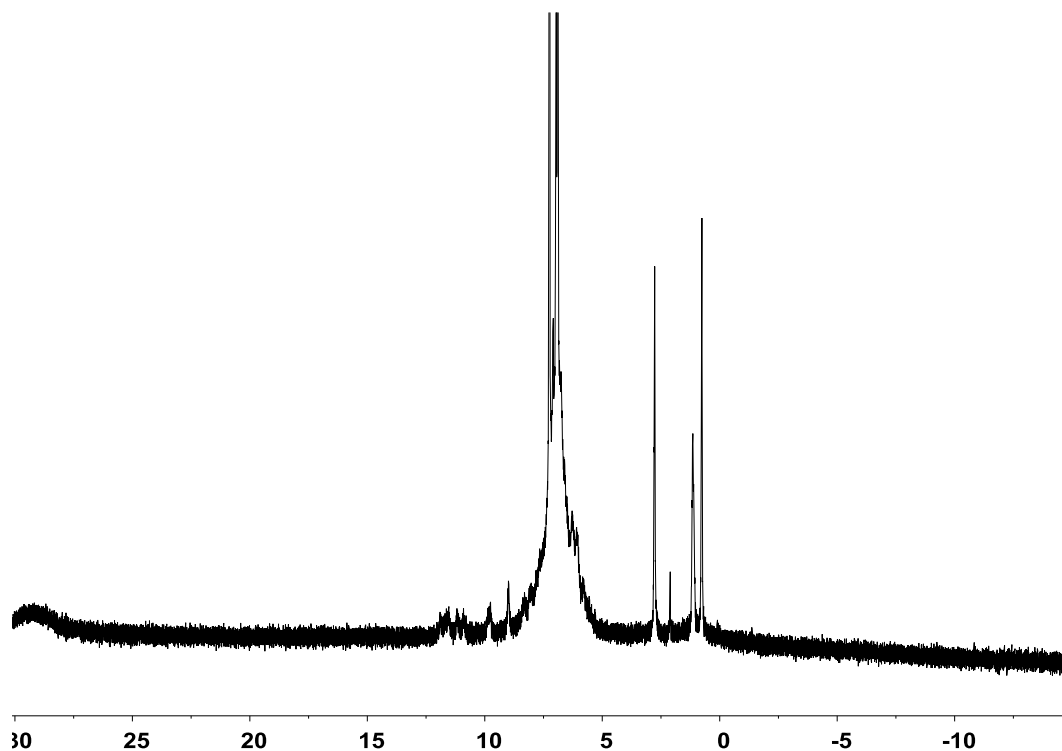

Figure S26.  $^1\text{H}$  NMR of **8**.

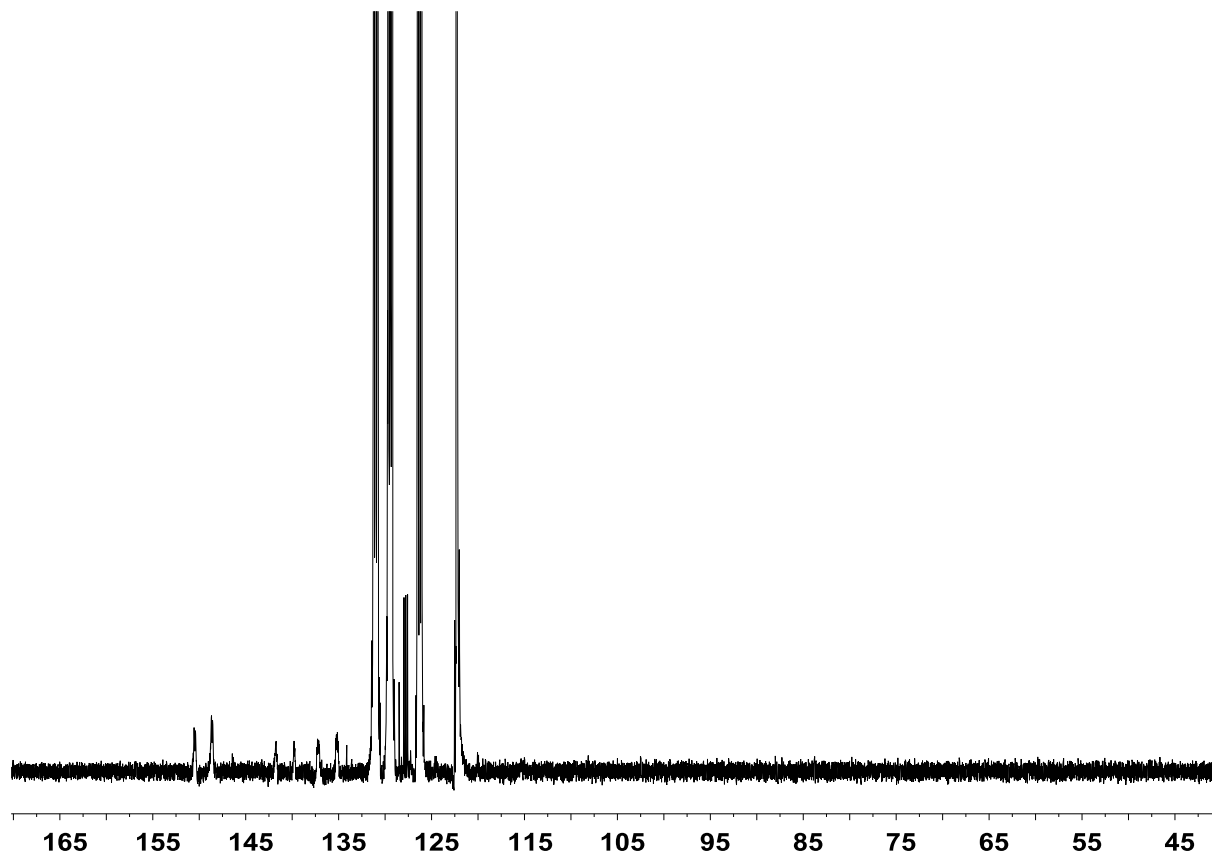

Figure S27.  $^{13}\text{C}\{^1\text{H}\}$  NMR of **8**.

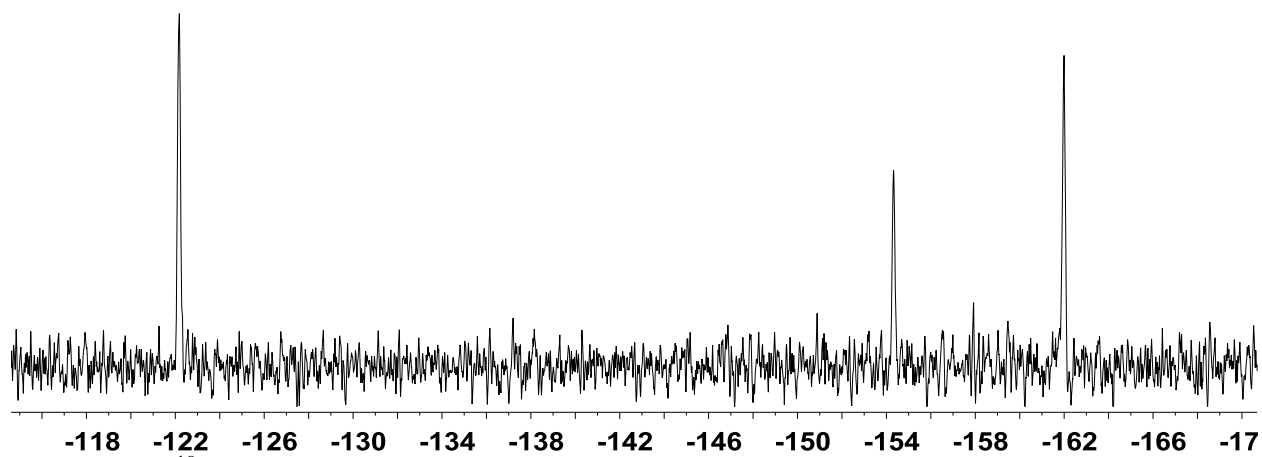

Figure S28.  $^{19}\text{F}$  NMR of **8**.

### Generation of **8** and $[\text{Cp}^*_2\text{Fe}][(\text{C}_{12}\text{H}_8)\text{CH}(\text{Al}(\text{C}_6\text{F}_5)_3)]$ (**9**)

A solution of  $\text{Al}(\text{C}_6\text{F}_5)_3$  (31.4 mg, 0.0546 mmol) and  $\text{Cp}^*_2\text{Fe}$  (17.8 mg, 0.0546 mmol) in 1 mL of  $\text{C}_6\text{H}_5\text{Cl}$  was added slowly to a solution of  $(\text{C}_{12}\text{H}_8)\text{CN}_2$  (10.5 mg, 0.0546 mmol) in 1 mL of  $\text{C}_6\text{H}_5\text{Cl}$ . The solution immediately turned from light yellow to deep green, the EPR spectra for the reaction was quickly obtained (For 5 min and 5 h at room temperature as shown in Figure S29). Addition of a solution of  $\text{Ph}_3\text{SnH}$  (19.2 mg, 0.0546 mmol) in 1 mL of  $\text{C}_6\text{H}_5\text{Cl}$ . The reaction mixture was allowed to stir at room temperature for another hour. The volatiles were then removed under vacuum. While many products were generated in the reaction as evidenced by  $^{19}\text{F}$  NMR since the mixture of  $\text{Cp}^*_2\text{Fe}$  and  $\text{Al}(\text{C}_6\text{F}_5)_3$  could also react with  $\text{Ph}_3\text{SnH}$ , the generation of **8** was identified by  $^{19}\text{F}$  NMR, while the crystals of **9** that is suitable for X-ray studies were grow from layer a solution of the reaction mixture in  $\text{C}_6\text{H}_5\text{Cl}$  with pentane at  $-35^\circ\text{C}$  temperature.

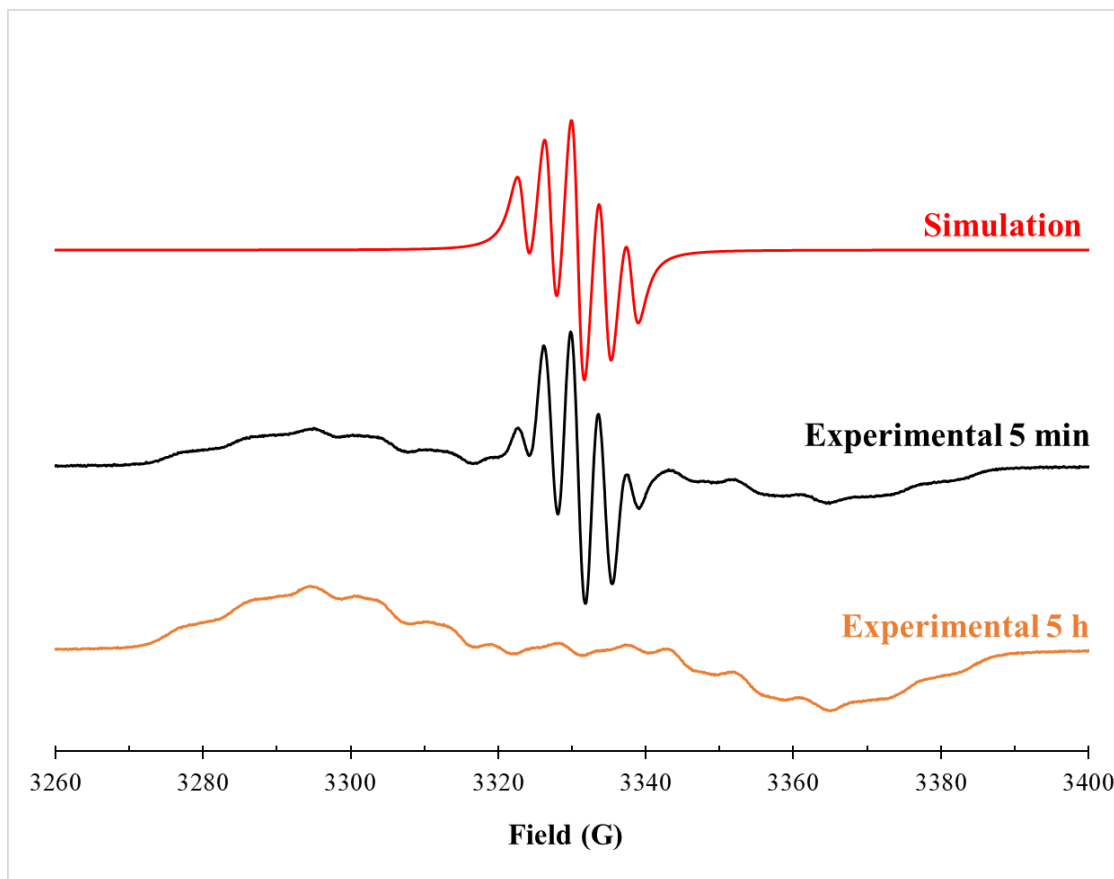

**Figure S29.** Experimental and simulation EPR spectra of the reaction crude for generation of **8** and **9**.

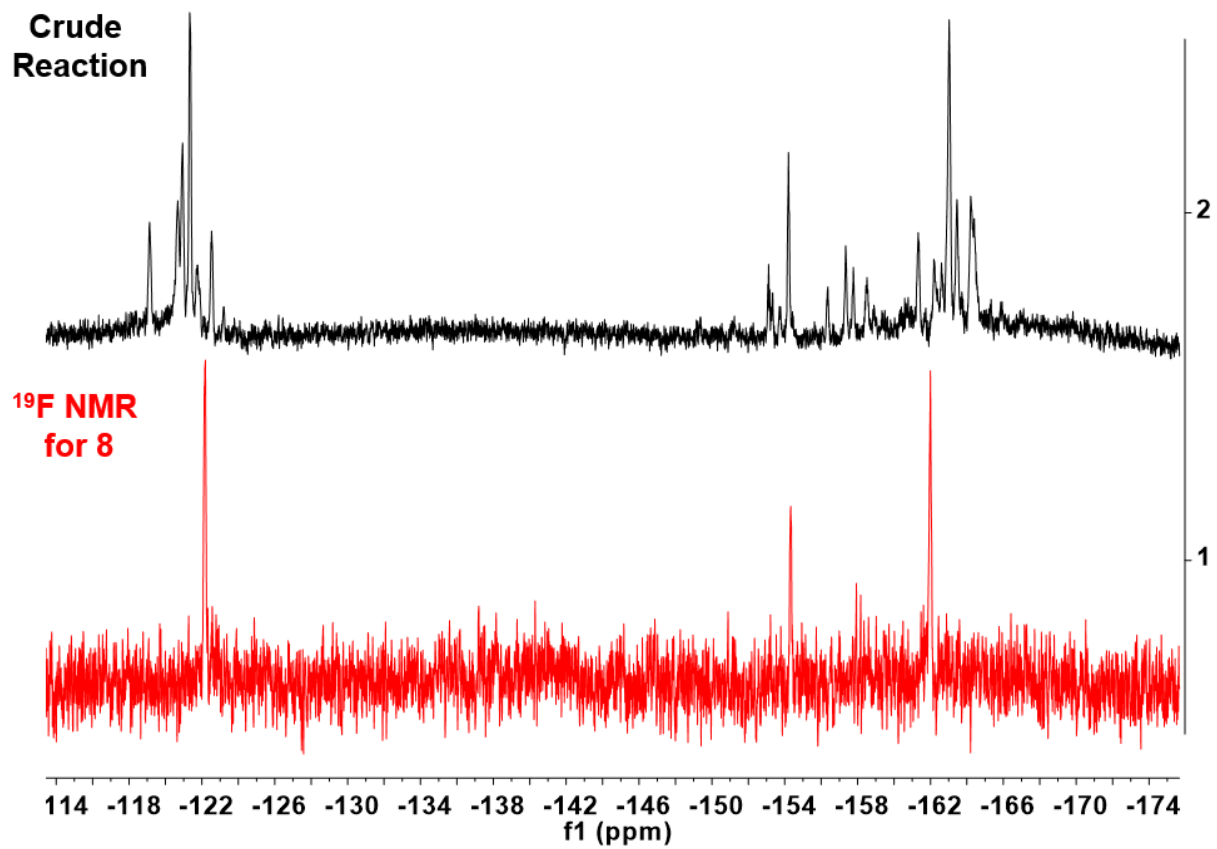

**Figure S30.** Stacked  $^{19}\text{F}$  NMR spectra for the crude reaction comparing with **8**.

## 2. X-ray Crystallography

**X-ray Data Collection and Reduction.** Crystals were coated in Paratone-N oil in an N<sub>2</sub> filled glovebox, mounted on a MiTegen Micromount, and placed under a N<sub>2</sub> stream, thus maintaining a dry, O<sub>2</sub>-free environment for each crystal. The data were collected on a Bruker Apex II diffractometer using a graphite monochromator with Mo K $\alpha$  radiation ( $\lambda = 0.71073 \text{ \AA}$ ). The data were collected at 150(2) K for all crystals. The frames were integrated with the Bruker SAINT software package using a narrow-frame algorithm. Data were corrected for absorption effects using the empirical multiscan method (SADABS).

**Structure Solution and Refinement.** The structures were solved by intrinsic phasing using XS. All the structures were subjected to full-matrix least-squares refinement on F<sup>2</sup> using XL as implemented in the SHELXTL suite of programs. All non-hydrogen atoms were refined with anisotropically thermal parameters. Carbon bound hydrogen atoms were placed in geometrically calculated positions and refined using an appropriate riding model and coupled isotropic thermal parameters. For compound **1**, **4**, **5**, and **8**, the N bound hydrogen atoms and H bound to the C center that is connected with Al of **9** were located through electron density difference map and modeled with appropriate riding model and coupled isotropic thermal parameters.

For compound **1**, the chlorobenzene solvent molecule was modeled as disordered over an inversion center, while for compound **4**, one of the Cp\* ring was modeled as position disorder with a ratio of 42:58.

For compound **7**, there are two disordered chlorobenzene solvent molecules modeled in the asymmetric unit. While one of the chlorobenzene molecules was modeled as a positional disorder over an inversion center with Part -1, the other chlorobenzene molecule was treated as simple positional disorder with free variable method resulting a ratio of 43:57.

For compound **8**, one of the Cp\* anion on the [Cp\*<sub>2</sub>Fe]<sup>+</sup> cation was modeled as a positional disorder with a ratio of 43:57.



**Table S1.** Summary of crystallographic data for compounds **1 - 3**.

|                                                   | <b>1</b>                          | <b>2</b>         | <b>3</b>        |
|---------------------------------------------------|-----------------------------------|------------------|-----------------|
| empirical formula                                 | C54 H43.50 B Cl 0.50<br>Co F15 N2 | C38 H29 B Co F15 | C51 H54 B Cr N2 |
| formula weight                                    | 1092.87                           | 840.35           | 757.77          |
| crystal system                                    | Triclinic                         | Monoclinic       | Triclinic       |
| space group                                       | $P\bar{1}$                        | $P2_1/n$         | $P\bar{1}$      |
| $a$ (Å)                                           | 11.9356(9)                        | 11.506(2)        | 11.353(2)       |
| $b$ (Å)                                           | 11.961(2)                         | 17.317(2)        | 11.402(2)       |
| $c$ (Å)                                           | 18.574(2)                         | 17.589(2)        | 18.323(2)       |
| $\alpha$ (deg.)                                   | 77.087(2)                         |                  | 99.080(4)       |
| $\beta$ (deg.)                                    | 84.528(2)                         | 96.728(4)        | 103.704(4)      |
| $\gamma$ (deg.)                                   | 72.178(2)                         |                  | 111.170(4)      |
| vol (Å <sup>3</sup> )                             | 2459.5(4)                         | 3480.3(8)        | 2069.8(4)       |
| $Z$                                               | 2                                 | 4                | 2               |
| $\rho$ (calcd) (Mg·cm <sup>3</sup> )              | 1.476                             | 1.604            | 1.216           |
| $\mu$ (mm <sup>-1</sup> )                         | 0.473                             | 0.603            | 0.314           |
| $F(000)$                                          | 1114                              | 1696             | 806             |
| Theta range (°)                                   | 2.789 to 26.372                   | 2.241 to 25.682  | 2.576 to 28.283 |
| $T$ (K)                                           | 150(2)                            | 150(2)           | 150(2)          |
| reflections collected                             | 50483                             | 48902            | 39398           |
| unique reflections                                | 10022                             | 6596             | 10267           |
| $R_{int}$                                         | 0.1065                            | 0.1438           | 0.0679          |
| GOF ( $F^2$ )                                     | 1.058                             | 0.940            | 1.050           |
| R1 indices [ $I > 2\sigma(I)$ ]                   | 0.0658                            | 0.0705           | 0.0665          |
| wR2 indices (all data)                            | 0.1785                            | 0.2237           | 0.2047          |
| Largest diff. peak and hole (e. Å <sup>-3</sup> ) | 0.975 & -0.633                    | 0.487 & -0.925   | 0.898 & -0.459  |
| CCDC No.                                          | 1917670                           | 1917669          | 1917668         |

**Table S2.** Summary of crystallographic data for compounds **4**, **5**, and **7**.

|                                                   | <b>4</b>          | <b>5</b>           | <b>7</b>        |
|---------------------------------------------------|-------------------|--------------------|-----------------|
| empirical formula                                 | C54 H58 B Cr F N2 | C57 H59 B Cl Cr N2 | C44 H49 B Cl Cr |
| formula weight                                    | 816.83            | 870.32             | 676.09          |
| crystal system                                    | Triclinic         | Monoclinic         | Triclinic       |
| space group                                       | $P\bar{1}$        | $P2_1/n$           | $P\bar{1}$      |
| $a$ (Å)                                           | 10.814(2)         | 10.9237(4)         | 9.8346(9)       |
| $b$ (Å)                                           | 11.942(3)         | 17.3262(7)         | 10.910(2)       |
| $c$ (Å)                                           | 19.224(4)         | 25.4816(8)         | 18.520(2)       |
| $\alpha$ (deg.)                                   | 85.793(7)         |                    | 94.323(3)       |
| $\beta$ (deg.)                                    | 84.136(7)         | 99.658(2)          | 94.455(3)       |
| $\gamma$ (deg.)                                   | 67.003(6)         |                    | 108.612(3)      |
| vol (Å <sup>3</sup> )                             | 2271.7(8)         | 4754.5(3)          | 1867.0(4)       |
| $Z$                                               | 2                 | 2                  | 2               |
| $\rho$ (calcd) (Mg·cm <sup>3</sup> )              | 1.194             | 1.216              | 1.203           |
| $\mu$ (mm <sup>-1</sup> )                         | 0.294             | 0.336              | 0.407           |
| $F(000)$                                          | 868               | 1844               | 718             |
| Theta range (°)                                   | 2.104 to 25.682   | 3.451 to 30.508    | 2.951 to 26.730 |
| $T$ (K)                                           | 150(2)            | 150(2)             | 150(2)          |
| reflections collected                             | 21869             | 42470              | 38536           |
| unique reflections                                | 8517              | 14470              | 7930            |
| $R_{int}$                                         | 0.0447            | 0.1042             | 0.0707          |
| GOF ( $F^2$ )                                     | 1.051             | 1.007              | 1.038           |
| R1 indices [ $I > 2\sigma(I)$ ]                   | 0.0600            | 0.0918             | 0.0732          |
| wR2 indices (all data)                            | 0.1788            | 0.2457             | 0.2150          |
| Largest diff. peak and hole (e. Å <sup>-3</sup> ) | 0.379 & -0.518    | 1.261 & -0.804     | 0.921 & -0.889  |
| CCDC No.                                          | 1917667           | 1955444            | 1955447         |

**Table S3.** Summary of crystallographic data for compounds **8**, **9**, and **(C<sub>12</sub>H<sub>8</sub>)C(C<sub>6</sub>F<sub>5</sub>)(B(C<sub>6</sub>F<sub>5</sub>)<sub>2</sub>)**.

|                                                         | <b>8</b>                           | <b>9</b>                           | <b>(C<sub>12</sub>H<sub>8</sub>)C(C<sub>6</sub>F<sub>5</sub>)(B(C<sub>6</sub>F<sub>5</sub>)<sub>2</sub>)</b> |
|---------------------------------------------------------|------------------------------------|------------------------------------|--------------------------------------------------------------------------------------------------------------|
| empirical formula                                       | C51 H39 Al F15<br>Fe N2            | C57 H44 Al Cl<br>F15 Fe            | C31 H8 B F15                                                                                                 |
| formula weight                                          | 1047.67                            | 1132.20                            | 676.18                                                                                                       |
| crystal system                                          | Monoclinic                         | Monoclinic                         | Triclinic                                                                                                    |
| space group                                             | <i>P</i> 2 <sub>1</sub> / <i>c</i> | <i>P</i> 2 <sub>1</sub> / <i>c</i> | <i>P</i> $\bar{1}$                                                                                           |
| <i>a</i> (Å)                                            | 9.9270(8)                          | 14.2675(9)                         | 9.314(2)                                                                                                     |
| <i>b</i> (Å)                                            | 22.685(2)                          | 14.820(2)                          | 10.638(2)                                                                                                    |
| <i>c</i> (Å)                                            | 21.241(2)                          | 23.893(2)                          | 14.314(2)                                                                                                    |
| $\alpha$ (deg.)                                         |                                    |                                    | 92.390(4)                                                                                                    |
| $\beta$ (deg.)                                          | 96.544(2)                          | 93.259(4)                          | 102.317(4)                                                                                                   |
| $\gamma$ (deg.)                                         |                                    |                                    | 110.658(4)                                                                                                   |
| vol (Å <sup>3</sup> )                                   | 4752.2(6)                          | 5043.6(6)                          | 1285.8(3)                                                                                                    |
| <i>Z</i>                                                | 4                                  | 4                                  | 2                                                                                                            |
| $\rho$ (calcd) (Mg·cm <sup>3</sup> )                    | 1.464                              | 1.491                              | 1.746                                                                                                        |
| $\mu$ (mm <sup>-1</sup> )                               | 0.433                              | 0.464                              | 0.177                                                                                                        |
| <i>F</i> (000)                                          | 2132                               | 2308                               | 668                                                                                                          |
| Theta range (°)                                         | 2.038 to 26.729                    | 2.879 to 26.022                    | 2.410 to 26.019                                                                                              |
| <i>T</i> (K)                                            | 150(2)                             | 150(2)                             | 150(2)                                                                                                       |
| reflections collected                                   | 72023                              | 39347                              | 22517                                                                                                        |
| unique reflections                                      | 10073                              | 9937                               | 5025                                                                                                         |
| <i>R</i> <sub>int</sub>                                 | 0.0605                             | 0.1188                             | 0.0849                                                                                                       |
| GOF ( <i>F</i> <sup>2</sup> )                           | 1.024                              | 1.026                              | 1.017                                                                                                        |
| <i>R</i> 1 indices [ <i>I</i> >2 $\sigma$ ( <i>I</i> )] | 0.0464                             | 0.0679                             | 0.0546                                                                                                       |
| w <i>R</i> 2 indices (all data)                         | 0.1339                             | 0.2008                             | 0.1317                                                                                                       |
| Largest diff. peak and hole (e. Å <sup>-3</sup> )       | 0.407 & -0.455                     | 0.553 & -0.450                     | 0.222 & -0.318                                                                                               |
| CCDC No.                                                | 1955445                            | 1955448                            | 195446                                                                                                       |

### 3. Computational Chemistry

**Computational Details:** The quantum chemical DFT calculations have been performed with the TURBOMOLE 7.3 suite of programs<sup>[2]</sup> The structures are fully optimized at the TPSS-D3/def2-TZVP + COSMO(PhCl) level of theory, which combines the TPSS meta-GGA density functional<sup>[3]</sup> with the BJ-damped DFT-D3 dispersion correction<sup>[4]</sup> and the def2-TZVP basis set,<sup>[5]</sup> using the Conductor-like Screening Model (COSMO) continuum solvation model<sup>[6]</sup> for PhCl solvent (dielectric constant  $\epsilon = 5.7$  and solvent diameter  $R_{\text{solv}} = 3.50 \text{ \AA}$ ). The density-fitting RI-J approach<sup>[5a, 7]</sup> is used to accelerate the geometry optimization and numerical harmonic frequency calculations<sup>[8]</sup> in solution. The optimized structures are characterized by frequency analysis to identify the nature of located stationary points (no imaginary frequency for true minima and only one imaginary frequency for transition state) and to provide thermal corrections (at 298.15 K and 1 atm) according to the modified ideal gas–rigid rotor–harmonic oscillator model.<sup>[9]</sup> This choice of dispersion-corrected meta-GGA functional makes the efficient exploration of all potential reaction paths possible.

The final solvation free energies in PhCl are computed with the COSMO-RS solvation model<sup>[10]</sup> (parameter file: BP\_TZVP\_C30\_1601.ctd) using the COSMOtherm program package<sup>[11]</sup> on the above TPSS-D3 optimized structures, and corrected by  $+1.89 \text{ kcal}\cdot\text{mol}^{-1}$  to account for higher reference solute concentration of  $1 \text{ mol}\cdot\text{L}^{-1}$  usually used in solution. To check the effects of the chosen DFT functional on the reaction energies and barriers, single-point calculations at the meta-GGA TPSS-D3<sup>[3]</sup> and hybrid-meta-GGA PW6B95-D3<sup>[12]</sup> levels are performed using a larger def2-QZVP basis set.<sup>[5b, 13]</sup> The final reaction Gibbs free energies ( $\Delta G$ ) are determined from the electronic single-point energies plus TPSS-D3 thermal corrections and COSMO-RS solvation free energies.

Since DFT calculations for redox potentials of transition metal complexes like  $\text{Cp}^*_2\text{Co}$ ,  $\text{Cp}^*_2\text{Cr}$  and  $\text{Cp}_2\text{Fe}$  could potentially suffer from their multi-reference nature of electronic structure, the experimental values of  $-1.88$  and  $-1.45$  and  $-0.53 \text{ V}$  ( $-43.4$ ,  $-33.4$ ,  $-12.2 \text{ kcal/mol}$ )<sup>[14]</sup> of the  $\text{Cp}^*_2\text{Co}/\text{Cp}^*_2\text{Co}^+$ ,  $\text{Cp}^*_2\text{Cr}/\text{Cp}^*_2\text{Cr}^+$  and  $\text{Cp}^*_2\text{Fe}/\text{Cp}^*_2\text{Fe}^+$  redox pairs relative to  $\text{Cp}_2\text{Fe}/\text{Cp}_2\text{Fe}^+$  in  $\text{CH}_3\text{CN}$  solution are used as benchmark. The DFT-computed values in  $\text{CH}_3\text{CN}$  are ( $-32.9$ ,  $-31.6$  and  $-10.6 \text{ kcal/mol}$ ) and ( $-47.8$ ,  $-30.9$  and  $-10.8 \text{ kcal/mol}$ ) at the PW6B95-D3 and TPSS-D3 levels (see Tables S1). Despite good agreements are observed for the  $\text{Cp}^*_2\text{Cr}/\text{Cp}^*_2\text{Cr}^+$  and  $\text{Cp}^*_2\text{Fe}/\text{Cp}^*_2\text{Fe}^+$  pairs, a  $+10.5 \text{ kcal/mol}$  too positive value is found for the  $\text{Cp}^*_2\text{Co}/\text{Cp}^*_2\text{Co}^+$  pair (poor description for the 19-valence-electron  $\text{Cp}^*_2\text{Co}$ ) at the PW6B95-D3 level thus it should be used with caution. In PhCl solution, COSMO-RS calculations show that these computed values should be corrected by  $-2.9$ ,  $-3.1$  and  $2.9 \text{ kcal/mol}$ , respectively.

The final free energies from both DFT functionals are in good mutual agreement of  $-0.7 \pm 3.3 \text{ kcal/mol}$  (mean deviation  $\pm$  standard deviation, excluding the  $\text{Cp}^*_2\text{Co}$  redox potential) but the reaction barriers at PW6B95-D3 level are usually  $3.7 \pm 1.9 \text{ kcal/mol}$  higher (see Table S1 below). In open-shell cases including transition metal complexes, the final results are somewhat sensitive to the choice of DFT functional. In our discussion, the higher-level PW6B95-D3 Gibbs free energies (in  $\text{kcal/mol}$ , at 298.15 K and 1 mol/L standard state concentration) will be used in our discussion unless specified otherwise, since meta-GGA functionals usually underestimate reaction barriers that could be improved by using hybrid meta-GGA functionals.

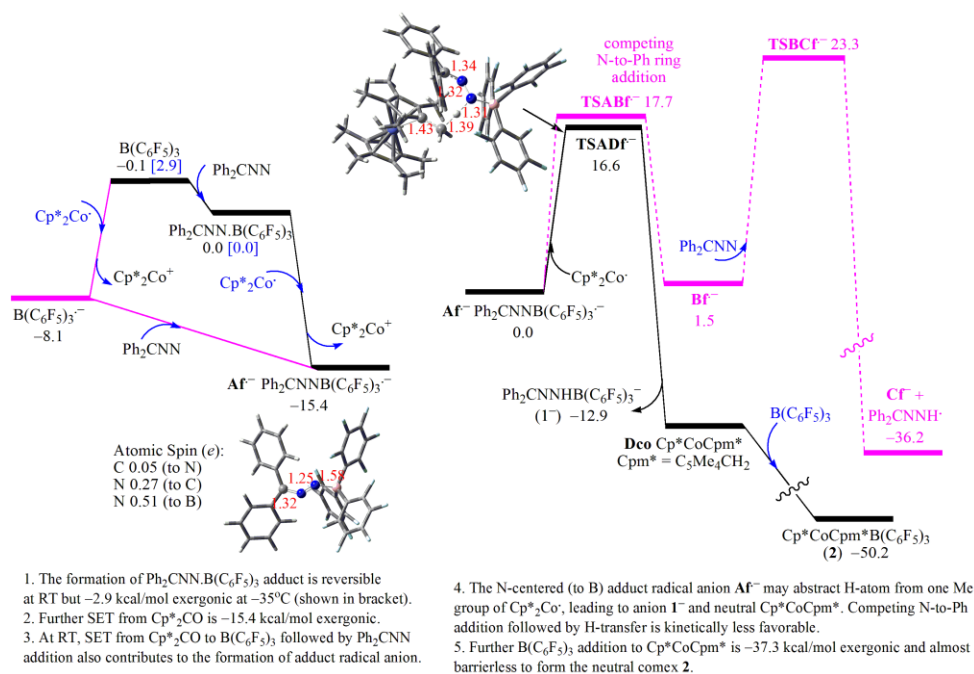

(A)

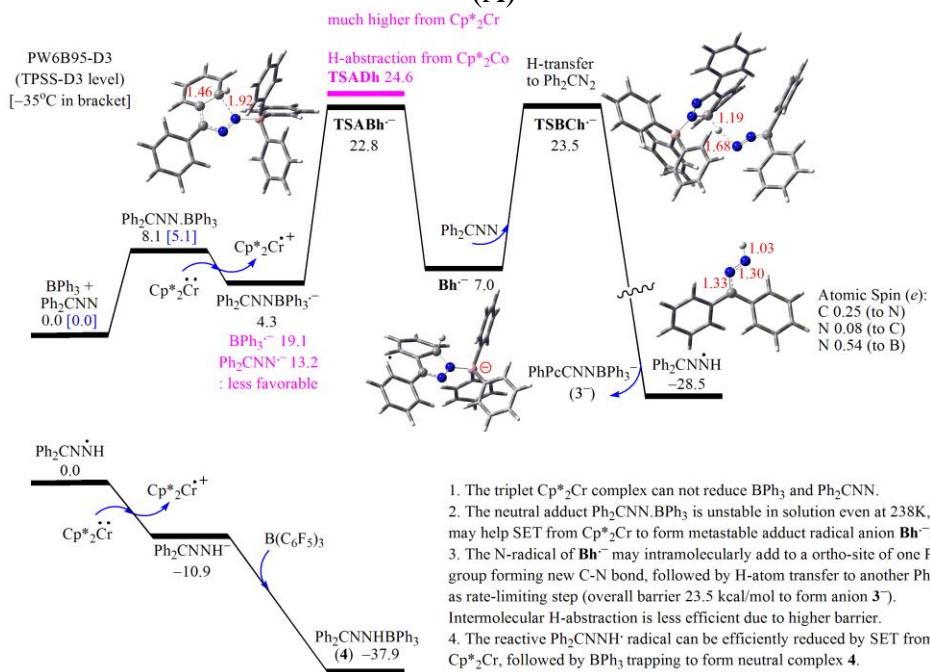

(B)

**Figure S31.** The DFT-computed reaction free energy paths in PhCl solution (in kcal/mol, at 298 K and 1 mol/L reference concentration) for the reactions of  $\text{Ph}_2\text{CNN}$  with (A)  $\text{B}(\text{C}_6\text{F}_5)_3$  and  $\text{Cp}^*_2\text{Co}$ , and (B)  $\text{BPh}_3$  and triplet  $\text{Cp}^*_2\text{Cr}$ , computed at the PW6B95-D3/def2-QZVP + COSMO-RS // TPSS-D3/def2-TZVP + COSMO level of theory. More detailed energies and brief description of potential reactions are given in Tables S1. Selected bond lengths are given in Å; crucial H, C, N and B atoms are highlighted as white, grey, blue and pink balls, respectively.

**Table S4.** TPSS-D3/def2-TZVP + COSMO computed lowest imaginary frequency (ImF), zero-point energies (ZPE), gas-phase enthalpic (Hc) and Gibbs free-energy (Gc) corrections; the COSMO-RS computed solvation enthalpic (Hsol) and Gibbs free-energy (Gsol) corrections in PhCl solution; TPSS-D3/def2-QZVP and PW6B95-D3/def2-QZVP single-point energies (TPSS-D3 and PW6B95-D3); the relative electronic energies ( $\Delta$ ET and  $\Delta$ EP) and Gibbs free-energies ( $\Delta$ GT and  $\Delta$ GP) at the TPSS-D3 and PW6B95-D3 levels. Each structure is labeled either by its molecular formula or a specific name in bold. Transition structures (with only one imaginary frequency) are indicated by the "TS" suffix while radicals, positive and negative charges are indicated by  $\cdot$ , + and – signs, respectively. See also Figure S1 for labellings.

| Reactions                                                                                                                                                                               | ImF<br>cm <sup>-1</sup> | Zpe<br>kcal/mol | Hc<br>kcal/mol | Gc<br>kcal/mol | Hsol<br>kcal/mol | Gsol<br>kcal/mol | TPSS<br>Eh  | PW6B95<br>Eh | ET<br>kcal/mol | EP<br>kcal/mol | GT<br>kcal/mol | GP<br>kcal/mol |
|-----------------------------------------------------------------------------------------------------------------------------------------------------------------------------------------|-------------------------|-----------------|----------------|----------------|------------------|------------------|-------------|--------------|----------------|----------------|----------------|----------------|
| <i>Adduct of BPh<sub>3</sub> (Rh) and Ph<sub>2</sub>CN<sub>2</sub> (Rn): unstable even at 238K (-35 °C)</i>                                                                             |                         |                 |                |                |                  |                  |             |              |                |                |                |                |
| <b>Rn + Rh</b> (238K)                                                                                                                                                                   | 0                       | 292.25          | 304.40         | 256.56         | -35.34           | -24.88           | -1331.57120 | -1333.03099  | 0.0            | 0.0            | 0.0            | 0.0            |
| <b>Ah</b> (238K)                                                                                                                                                                        | 0                       | 293.17          | 305.42         | 268.44         | -32.68           | -24.35           | -1331.58415 | -1333.03966  | -8.1           | -5.4           | 5.1            | 2.4            |
| <b>Rn + Rh</b> (298K)                                                                                                                                                                   | 0                       | 292.25          | 310.46         | 244.34         | -35.34           | -24.88           | -1331.57120 | -1333.03099  | 0.0            | 0.0            | 0.0            | 0.0            |
| <b>Ah</b> (298 K)                                                                                                                                                                       | 0                       | 293.17          | 311.66         | 259.19         | -32.68           | -24.35           | -1331.58415 | -1333.03966  | -8.1           | -5.4           | 8.1            | 5.4            |
| <i>Single electron transfer from triplet Cp*<sub>2</sub>Cr (Rcr) with the ligand Cp* = C<sub>5</sub>Me<sub>5</sub>, forming quartet Cp*<sub>2</sub>Cr<sup>+</sup> (Rcr<sup>+</sup>)</i> |                         |                 |                |                |                  |                  |             |              |                |                |                |                |
| <b>Rh + Rcr</b>                                                                                                                                                                         | 0                       | 445.54          | 472.95         | 388.69         | -36.43           | -25.61           | -2545.68691 | -2547.87482  | 0.0            | 0.0            | 0.0            | 0.0            |
| <b>Rh<sup>-</sup> + Rcr<sup>+</sup></b>                                                                                                                                                 | 0                       | 446.36          | 473.37         | 391.45         | -108.22          | -94.86           | -2545.54636 | -2547.73840  | 88.2           | 85.6           | 19.1           | 21.7           |
| <b>Rn + Rcr</b>                                                                                                                                                                         | 0                       | 395.11          | 420.52         | 339.81         | -31.87           | -22.10           | -2436.64927 | -2438.69735  | 0.0            | 0.0            | 0.0            | 0.0            |
| <b>Acr</b> (N...Cr)                                                                                                                                                                     | 0                       | 396.48          | 422.00         | 356.60         | -30.15           | -22.20           | -2436.66608 | -2438.69990  | -10.6          | -1.6           | 13.2           | 4.3            |
| <b>Rn<sup>-</sup> + Rcr<sup>+</sup></b>                                                                                                                                                 | 0                       | 395.98          | 421.03         | 342.17         | -107.11          | -94.50           | -2436.50985 | -2438.56463  | 87.5           | 83.3           | 13.3           | 17.5           |
| <b>Rn + Rh + Rcr</b>                                                                                                                                                                    | 0                       | 566.45          | 601.97         | 486.42         | -51.82           | -36.29           | -3156.95369 | -3159.80158  | 0.0            | 0.0            | 0.0            | 0.0            |
| <b>Ah<sup>-</sup> + Rcr<sup>+</sup></b>                                                                                                                                                 | 0                       | 568.68          | 603.93         | 504.51         | -114.78          | -99.07           | -3156.86937 | -3159.72043  | 52.9           | 50.9           | 4.3            | 6.3            |
| <b>Ah<sup>-</sup> + Rcr</b>                                                                                                                                                             | 0                       | 566.95          | 602.31         | 501.25         | -82.79           | -67.84           | -3157.04094 | -3159.88407  | 0.0            | 0.0            | 0.0            | 0.0            |
| <b>Ah<sup>2-</sup> + Rcr<sup>+</sup></b>                                                                                                                                                | 95                      | 564.95          | 600.71         | 500.29         | -209.32          | -190.58          | -3156.81633 | -3159.66754  | 141.0          | 135.9          | 12.2           | 17.3           |
| <i>Intramolecular N-radical cyclization</i>                                                                                                                                             |                         |                 |                |                |                  |                  |             |              |                |                |                |                |
| <b>Ah<sup>-</sup> (INT1)</b>                                                                                                                                                            | 0                       | 292.75          | 310.81         | 259.17         | -66.31           | -56.43           | -1331.65845 | -1333.11348  | 0.0            | 0.0            | 4.3            | 0.0            |
| <b>TSABh<sup>-</sup> (TS1)</b>                                                                                                                                                          | -341                    | 291.64          | 309.27         | 258.68         | -65.69           | -55.96           | -1331.63399 | -1333.08404  | 15.4           | 18.5           | 22.8           | 15.3           |
| <b>Bh<sup>-</sup> (INT2)</b>                                                                                                                                                            | 0                       | 292.41          | 310.13         | 259.33         | -66.74           | -56.97           | -1331.65077 | -1333.10869  | 4.8            | 3.0            | 7.0            | 4.4            |
| <i>... and subsequent H-atom transfer to Ph<sub>2</sub>CN<sub>2</sub> (Rn)</i>                                                                                                          |                         |                 |                |                |                  |                  |             |              |                |                |                |                |
| <b>Ah<sup>-</sup> + Rn</b>                                                                                                                                                              | 0                       | 413.66          | 439.82         | 356.89         | -81.70           | -67.12           | -1942.92523 | -1945.04024  | 0.0            | 0.0            | 4.3            | 0.0            |
| <b>TSBCh1<sup>-</sup></b>                                                                                                                                                               | -151                    | 414.16          | 439.63         | 373.93         | -74.43           | -62.28           | -1942.93058 | -1945.03663  | -3.4           | 2.3            | 26.6           | 16.6           |

|                                                                                                                                                                                                                                                                           |      |        |        |        |         |        |             |             |       |       |       |       |
|---------------------------------------------------------------------------------------------------------------------------------------------------------------------------------------------------------------------------------------------------------------------------|------|--------|--------|--------|---------|--------|-------------|-------------|-------|-------|-------|-------|
| <b>TSBCh<sup>-</sup> (TS2)</b>                                                                                                                                                                                                                                            | -55  | 413.85 | 439.36 | 373.48 | -74.51  | -62.62 | -1942.93431 | -1945.04024 | -5.7  | 0.0   | 23.5  | 13.5  |
| <b>Cn<sup>+</sup> + Ch<sup>-</sup> (3<sup>-</sup>)</b>                                                                                                                                                                                                                    | 0    | 415.01 | 440.60 | 358.40 | -84.34  | -69.44 | -1942.96895 | -1945.09128 | -27.4 | -32.0 | -28.5 | -28.3 |
| <i>Triplet Cp*<sub>2</sub>Cr (Rcr) reduction and BPh<sub>3</sub> (Rh) trapping of Ph<sub>2</sub>CNNH (Cn)</i>                                                                                                                                                             |      |        |        |        |         |        |             |             |       |       |       |       |
| <b>Cn<sup>+</sup> + Rcr</b>                                                                                                                                                                                                                                               | 0    | 402.84 | 428.02 | 347.45 | -33.52  | -23.41 | -2437.22756 | -2439.27468 | 0.0   | 0.0   | 0.0   | 0.0   |
| <b>Cn<sup>-</sup> + Rcr<sup>+</sup></b>                                                                                                                                                                                                                                   | 0    | 402.91 | 428.23 | 348.83 | -109.16 | -96.30 | -2437.12182 | -2439.17805 | 66.4  | 60.7  | -10.9 | -5.2  |
| <b>Cn<sup>-</sup> + Rh</b>                                                                                                                                                                                                                                                | 0    | 298.32 | 316.56 | 250.10 | -80.64  | -67.85 | -1332.21532 | -1333.67533 | 0.0   | 0.0   | 0.0   | 0.0   |
| <b>Dh<sup>-</sup> (4<sup>-</sup>)</b>                                                                                                                                                                                                                                     | 19   | 298.75 | 317.44 | 264.23 | -66.75  | -56.68 | -1332.29520 | -1333.75574 | -50.1 | -50.5 | -27.1 | -26.7 |
| <i>Reversible Adduct of B(C<sub>6</sub>F<sub>5</sub>)<sub>3</sub> (Rf) and Ph<sub>2</sub>CN<sub>2</sub> (Rn): stable at 238K (-35 °C) in solution</i>                                                                                                                     |      |        |        |        |         |        |             |             |       |       |       |       |
| <b>Rn + Rf (238K)</b>                                                                                                                                                                                                                                                     | 0    | 215.19 | 233.38 | 173.65 | -30.96  | -22.28 | -2820.88910 | -2823.80079 | 0.0   | 0.0   | 0.0   | 0.0   |
| <b>Af (238K)</b>                                                                                                                                                                                                                                                          | 0    | 216.31 | 234.56 | 186.14 | -28.43  | -21.76 | -2820.91192 | -2823.82319 | -14.3 | -14.1 | -2.9  | -3.2  |
| <b>Rn + Rf (298K)</b>                                                                                                                                                                                                                                                     | 0    | 215.19 | 242.12 | 158.38 | -30.96  | -22.28 | -2820.88910 | -2823.80079 | 0.0   | 0.0   | 0.0   | 0.0   |
| <b>Af (298K)</b>                                                                                                                                                                                                                                                          | 0    | 216.31 | 243.47 | 173.95 | -28.43  | -21.76 | -2820.91192 | -2823.82319 | -14.3 | -14.1 | 0.1   | -0.1  |
| <i>Single electron transfer from Cp*<sub>2</sub>Co<sup>+</sup> (Rco<sup>+</sup>): facile formation of adduct radical anion Ph<sub>2</sub>CNNB(C<sub>6</sub>F<sub>5</sub>)<sub>3</sub><sup>-</sup> and singlet cation Cp*<sub>2</sub>Co<sup>+</sup> (Rco<sup>+</sup>):</i> |      |        |        |        |         |        |             |             |       |       |       |       |
| <b>Af + Rco<sup>+</sup></b>                                                                                                                                                                                                                                               | 0    | 490.42 | 534.86 | 416.57 | -44.64  | -32.97 | -4984.62107 | -4989.04730 | 0.0   | 0.0   | 0.0   | 0.0   |
| <b>Af<sup>-</sup> + Rco<sup>+</sup></b>                                                                                                                                                                                                                                   | 0    | 492.47 | 536.10 | 420.58 | -103.41 | -90.27 | -4984.57682 | -4988.98701 | 27.8  | 37.8  | -15.5 | -25.5 |
| <b>Rf + Rco<sup>+</sup></b>                                                                                                                                                                                                                                               | 0    | 368.39 | 404.50 | 303.27 | -31.77  | -22.81 | -4373.33146 | -4377.09814 | 0.0   | 0.0   | 0.0   | 0.0   |
| <b>Rf<sup>-</sup> + Rco<sup>+</sup></b>                                                                                                                                                                                                                                   | 0    | 369.94 | 405.51 | 306.56 | -92.81  | -82.44 | -4373.27019 | -4377.02112 | 38.5  | 48.3  | -8.0  | -17.9 |
| <b>Rn + Rf<sup>-</sup></b>                                                                                                                                                                                                                                                | 0    | 214.33 | 241.14 | 158.01 | -59.83  | -50.46 | -2820.97253 | -2823.88535 | 0.0   | 0.0   | 0.0   | 0.0   |
| <b>Af<sup>-</sup></b>                                                                                                                                                                                                                                                     | 0    | 215.96 | 242.71 | 174.30 | -55.05  | -47.60 | -2821.01238 | -2823.92448 | -25.0 | -24.6 | -7.3  | -7.7  |
| <b>Rn + Rco<sup>+</sup></b>                                                                                                                                                                                                                                               | 0    | 395.02 | 420.41 | 340.35 | -31.59  | -21.91 | -2774.97592 | -2777.15087 | 0.0   | 0.0   | 0.0   | 0.0   |
| <b>Rn<sup>-</sup> + Rco<sup>+</sup></b>                                                                                                                                                                                                                                   | 0    | 396.56 | 421.29 | 343.11 | -107.01 | -94.52 | -2774.86338 | -2777.02021 | 70.6  | 82.0  | 12.1  | 0.8   |
| <i>Intramolecular N-radical cyclization</i>                                                                                                                                                                                                                               |      |        |        |        |         |        |             |             |       |       |       |       |
| <b>Af<sup>-</sup></b>                                                                                                                                                                                                                                                     | 0    | 215.96 | 242.71 | 174.30 | -55.05  | -47.60 | -2821.01238 | -2823.92448 | 0.0   | 0.0   | 0.0   | 0.0   |
| <b>TSABf<sup>-</sup></b>                                                                                                                                                                                                                                                  | -326 | 215.05 | 241.40 | 173.76 | -54.96  | -47.40 | -2820.98763 | -2823.89572 | 15.5  | 18.1  | 17.7  | 15.2  |
| <b>Bf<sup>-</sup></b>                                                                                                                                                                                                                                                     | 0    | 215.62 | 242.04 | 174.32 | -55.20  | -47.76 | -2821.00512 | -2823.92187 | 4.6   | 1.6   | 1.5   | 4.4   |
| <i>... and subsequent H-atom transfer to Ph<sub>2</sub>CN<sub>2</sub> (Rn)</i>                                                                                                                                                                                            |      |        |        |        |         |        |             |             |       |       |       |       |
| <b>Bf<sup>-</sup> + Rn</b>                                                                                                                                                                                                                                                | 0    | 336.87 | 371.73 | 272.03 | -70.44  | -58.29 | -3432.27916 | -3435.85124 | 0.0   | 0.0   | 0.0   | 0.0   |
| <b>TSBCf<sup>-</sup></b>                                                                                                                                                                                                                                                  | -374 | 335.66 | 370.19 | 287.09 | -65.79  | -55.63 | -3432.27402 | -3435.83939 | 3.2   | 7.4   | 23.3  | 19.1  |
| <b>Cf<sup>+</sup> + Cn<sup>+</sup></b>                                                                                                                                                                                                                                    | 0    | 338.42 | 372.71 | 273.48 | -73.05  | -60.45 | -3432.32600 | -3435.90779 | -29.4 | -35.5 | -36.2 | -30.1 |
| <b>Cn<sup>+</sup> + Rco<sup>+</sup></b>                                                                                                                                                                                                                                   | 0    | 402.75 | 427.91 | 347.98 | -33.24  | -23.22 | -2775.55421 | -2777.72819 | 0.0   | 0.0   | 0.0   | 0.0   |

|                                                                                                                                                                                                             |       |        |        |        |         |         |             |             |       |       |       |       |
|-------------------------------------------------------------------------------------------------------------------------------------------------------------------------------------------------------------|-------|--------|--------|--------|---------|---------|-------------|-------------|-------|-------|-------|-------|
| <b>Cn<sup>-</sup> + Rco<sup>+</sup></b>                                                                                                                                                                     | 0     | 403.49 | 428.49 | 349.76 | -109.06 | -96.33  | -2775.47534 | -2777.63362 | 49.5  | 59.4  | -12.0 | -21.8 |
| <b>Cn<sup>-</sup> + Rf</b>                                                                                                                                                                                  | 0     | 221.26 | 248.21 | 164.14 | -76.26  | -65.25  | -2821.53323 | -2824.44512 | 0.0   | 0.0   | 0.0   | 0.0   |
| <b>Df<sup>-</sup> (1<sup>-</sup>)</b>                                                                                                                                                                       | 12    | 222.35 | 249.76 | 179.18 | -55.19  | -47.59  | -2821.64846 | -2824.56644 | -72.3 | -76.1 | -45.3 | -41.5 |
| <i>H-abstraction from Cp*<sub>2</sub>Co<sup>•</sup> (Rco<sup>•</sup>): proton-coupled electron transfer (SET to Af<sup>-</sup> is endergonic from triplet Rcr but nearly neutral from Rco<sup>•</sup>!)</i> |       |        |        |        |         |         |             |             |       |       |       |       |
| <b>Af<sup>-</sup> + Rcr</b>                                                                                                                                                                                 | 0     | 490.16 | 534.21 | 416.38 | -71.53  | -59.01  | -4646.39486 | -4650.69507 | 0.0   | 0.0   | 0.0   | 0.0   |
| <b>Af<sup>2-</sup> + Rcr<sup>+</sup></b>                                                                                                                                                                    | 0     | 488.23 | 532.90 | 414.72 | -188.41 | -172.83 | -4646.19558 | -4650.50194 | 125.1 | 121.2 | 5.7   | 9.6   |
| <b>Af<sup>-</sup> + Rco<sup>•</sup></b>                                                                                                                                                                     | 0     | 490.07 | 534.10 | 416.92 | -71.25  | -58.82  | -4984.72152 | -4989.14859 | 0.0   | 0.0   | 0.0   | 0.0   |
| <b>Af<sup>2-</sup> + Rco<sup>+</sup></b>                                                                                                                                                                    | 0     | 488.81 | 533.16 | 415.66 | -188.31 | -172.86 | -4984.54910 | -4988.95752 | 108.2 | 119.9 | 4.6   | -7.1  |
| <b>TSADf<sup>-</sup></b>                                                                                                                                                                                    | -1651 | 487.57 | 531.72 | 430.01 | -69.05  | -58.98  | -4984.73520 | -4989.13973 | -8.6  | 5.6   | 16.6  | 2.5   |
| <b>Dco + Df<sup>-</sup> (1<sup>-</sup>)</b>                                                                                                                                                                 | 12    | 489.73 | 533.83 | 415.23 | -72.82  | -59.92  | -4984.75039 | -4989.16473 | -18.1 | -10.1 | -12.9 | -20.9 |
| <b>Dco + Rf</b>                                                                                                                                                                                             | 0     | 361.66 | 397.17 | 296.71 | -33.20  | -23.92  | -4372.72425 | -4376.47231 | 0.0   | 0.0   | 0.0   | 0.0   |
| <b>TSDEF</b>                                                                                                                                                                                                | -46   | 362.06 | 397.42 | 312.52 | -30.19  | -23.24  | -4372.74058 | -4376.48739 | -10.3 | -9.5  | 5.1   | 4.4   |
| <b>Ef (2)</b>                                                                                                                                                                                               | 0     | 364.45 | 399.88 | 315.03 | -36.45  | -29.11  | -4372.79378 | -4376.54972 | -43.6 | -48.6 | -37.3 | -32.4 |
| <i>...3.6 kcal/mol higher barrier for H-abstraction from Cp*<sub>2</sub>Co<sup>•</sup> (Rco<sup>•</sup>) with N-radical anion Ah<sup>-</sup></i>                                                            |       |        |        |        |         |         |             |             |       |       |       |       |
| <b>Rco<sup>•</sup> + Ah<sup>-</sup> (INT1)</b>                                                                                                                                                              | 0     | 566.86 | 602.20 | 501.78 | -82.51  | -67.64  | -3495.36759 | -3498.33758 | 0.0   | 0.0   | 0.0   | 0.0   |
| <b>TSADh<sup>-</sup> (TS1')</b>                                                                                                                                                                             | -1603 | 563.73 | 599.21 | 514.17 | -78.83  | -66.42  | -3495.37906 | -3498.32403 | -7.2  | 8.5   | 20.2  | 4.5   |
| <b>Dco + Dh<sup>-</sup> (4<sup>-</sup>)</b>                                                                                                                                                                 | 19    | 566.13 | 601.51 | 500.28 | -84.37  | -69.01  | -3495.39713 | -3498.35402 | -18.5 | -10.3 | -13.2 | -21.4 |
| <i>Redox potentials relative to the Cp<sub>2</sub>Fe (Fc) in CH<sub>3</sub>CN solution (Experimental values: -43.4, -33.4 and -12.2 for Rco<sup>•</sup>, triplet Rcr and singlet Fs, respectively)</i>      |       |        |        |        |         |         |             |             |       |       |       |       |
| <b>Rco<sup>•</sup> + Fc<sup>+</sup></b>                                                                                                                                                                     | 0     | 379.78 | 403.19 | 327.65 | -62.50  | -54.77  | -3814.68917 | -3817.25186 | 0.0   | 0.0   | 0.0   | 0.0   |
| <b>Rco<sup>+</sup> + Fc</b>                                                                                                                                                                                 | 0     | 380.95 | 403.83 | 331.28 | -47.90  | -44.04  | -3814.78817 | -3817.32713 | -62.1 | -47.2 | -32.9 | -47.8 |
| <b>Rcr + Fc<sup>+</sup></b>                                                                                                                                                                                 | 0     | 379.88 | 403.30 | 327.12 | -62.77  | -54.95  | -3476.36252 | -3478.79835 | 0.0   | 0.0   | 0.0   | 0.0   |
| <b>Rcr<sup>+</sup> + Fc</b>                                                                                                                                                                                 | 0     | 380.37 | 403.57 | 330.34 | -47.77  | -43.83  | -3476.43465 | -3478.87155 | -45.3 | -45.9 | -31.6 | -30.9 |
| <b>Fs + Fc<sup>+</sup></b>                                                                                                                                                                                  | 0     | 381.07 | 403.97 | 330.43 | -62.38  | -54.67  | -3695.65763 | -3698.16151 | 0.0   | 0.0   | 0.0   | 0.0   |
| <b>Fs<sup>+</sup> + Fc</b>                                                                                                                                                                                  | 0     | 380.88 | 403.74 | 330.40 | -47.83  | -43.95  | -3695.69190 | -3698.19543 | -21.5 | -21.3 | -10.6 | -10.8 |
| <i>Redox potentials relative to the Cp<sub>2</sub>Fe (Fc) in PhCl solution: Cp*<sub>2</sub>Co<sup>•</sup> (Rco<sup>•</sup>), triplet Cp*<sub>2</sub>cr (Rcr), Cp*<sub>2</sub>Fe (Fs)</i>                    |       |        |        |        |         |         |             |             |       |       |       |       |
| <b>Rco<sup>•</sup> + Fc<sup>+</sup></b>                                                                                                                                                                     | 0     | 379.78 | 403.19 | 327.65 | -68.64  | -58.56  | -3814.68917 | -3817.25186 | 0.0   | 0.0   | 0.0   | 0.0   |
| <b>Rco<sup>+</sup> + Fc</b>                                                                                                                                                                                 | 0     | 380.95 | 403.83 | 331.28 | -60.11  | -50.73  | -3814.78817 | -3817.32713 | -62.1 | -47.2 | -35.8 | -50.7 |
| <b>Rcr + Fc<sup>+</sup></b>                                                                                                                                                                                 | 0     | 379.88 | 403.30 | 327.12 | -68.92  | -58.75  | -3476.36252 | -3478.79835 | 0.0   | 0.0   | 0.0   | 0.0   |
| <b>Rcr<sup>+</sup> + Fc</b>                                                                                                                                                                                 | 0     | 380.37 | 403.57 | 330.34 | -60.21  | -50.71  | -3476.43465 | -3478.87155 | -45.3 | -45.9 | -34.7 | -34.0 |
| <b>Fs + Fc<sup>+</sup></b>                                                                                                                                                                                  | 0     | 381.07 | 403.97 | 330.43 | -68.46  | -58.42  | -3695.65763 | -3698.16151 | 0.0   | 0.0   | 0.0   | 0.0   |
| <b>Fs<sup>+</sup> + Fc</b>                                                                                                                                                                                  | 0     | 380.88 | 403.74 | 330.40 | -48.81  | -44.77  | -3695.69190 | -3698.19543 | -21.5 | -21.3 | -7.7  | -7.9  |



**Table S5.** The TPSS-D3/def2-TZVP + COSMO optimized atomic Cartesian coordinates (in Å) in PhCl solution. Each structure is labeled by the specific name (See also Figure S1 and Table S1), followed by the number of atoms, the total energy, and the detailed atomic coordinates (in double-column text list).

|                          |                                                                                         |            |            |                        |                                                                                 |            |            |
|--------------------------|-----------------------------------------------------------------------------------------|------------|------------|------------------------|---------------------------------------------------------------------------------|------------|------------|
| <b>Acr</b>               | Ph <sub>2</sub> CNN.CrCp* <sub>2</sub> adduct with Cp* = C <sub>5</sub> Me <sub>5</sub> |            |            | C                      | 1.6905215                                                                       | 2.2843492  | -0.6936119 |
| 76                       |                                                                                         |            |            | C                      | 3.9682646                                                                       | 2.3124598  | 0.0945663  |
| Energy = -2436.565272267 |                                                                                         |            |            | C                      | 3.9406423                                                                       | -1.9543252 | 0.7211217  |
| Cr                       | -1.3212688                                                                              | -0.2423734 | 0.0140557  | C                      | 5.1671456                                                                       | -0.4327969 | -0.6888700 |
| C                        | -3.9493891                                                                              | -1.5892018 | 2.4564204  | C                      | 1.7183267                                                                       | 3.6711429  | -0.8149686 |
| C                        | 0.1108484                                                                               | -2.5158754 | -1.9415742 | H                      | 0.7816683                                                                       | 1.7483010  | -0.9374280 |
| C                        | -3.0006782                                                                              | -0.5070721 | 2.0420105  | C                      | 3.9899579                                                                       | 3.6977652  | -0.0255156 |
| C                        | -1.0718274                                                                              | -1.6209830 | -1.7368730 | C                      | 5.0435621                                                                       | -2.8004316 | 0.7700259  |
| C                        | -0.8467459                                                                              | -1.7079564 | 2.9379759  | H                      | 3.0276427                                                                       | -2.2185442 | 1.2470317  |
| C                        | -2.5844787                                                                              | -3.3584967 | -0.5393673 | C                      | 6.2730051                                                                       | -1.2792101 | -0.6337286 |
| C                        | -1.5633269                                                                              | -0.5747319 | 2.2615078  | C                      | 2.8683863                                                                       | 4.3935620  | -0.4896111 |
| C                        | -2.2988721                                                                              | -1.9974379 | -1.1014907 | H                      | 0.8317989                                                                       | 4.1924887  | -1.1685566 |
| C                        | -3.3006690                                                                              | 0.7521252  | 1.5185273  | H                      | 4.8888064                                                                       | 4.2408709  | 0.2560040  |
| C                        | -1.2241581                                                                              | -0.2872039 | -2.2237132 | C                      | 6.2251960                                                                       | -2.4680964 | 0.0985136  |
| C                        | -1.0239984                                                                              | 0.7230424  | 2.0071179  | H                      | 4.9865117                                                                       | -2.7220943 | 1.3443511  |
| C                        | -3.2339432                                                                              | -0.9329345 | -1.2616934 | H                      | 7.1755090                                                                       | -1.0128499 | -1.1785101 |
| C                        | -4.6462087                                                                              | 1.3508360  | 1.2522461  | H                      | 2.8897198                                                                       | 5.4753767  | -0.5853184 |
| C                        | -0.2308751                                                                              | 0.4638517  | -3.0576529 | H                      | 7.0894604                                                                       | -3.1248553 | 0.1424567  |
| C                        | -2.0529393                                                                              | 1.4862492  | 1.3819011  | H                      | 4.8422229                                                                       | 1.8014076  | 0.4843919  |
| C                        | -2.5525071                                                                              | 0.1489696  | -1.8922866 | H                      | 5.2176614                                                                       | 0.4680722  | -1.2925701 |
| C                        | 0.3142303                                                                               | 1.2340083  | 2.4427701  |                        |                                                                                 |            |            |
| C                        | -4.6960449                                                                              | -1.0162740 | -0.9578896 | <b>Af<sup>2-</sup></b> | Ph <sub>2</sub> CNNB(C <sub>6</sub> F <sub>5</sub> ) <sub>3</sub> <sup>2-</sup> |            |            |
| C                        | -1.9457275                                                                              | 2.9278807  | 0.9754101  | 59                     | Energy = -2820.959203485                                                        |            |            |
| C                        | -3.1495052                                                                              | 1.4555798  | -2.3233608 | B                      | -0.7650959                                                                      | 0.1857312  | -0.0260856 |
| H                        | -3.7130345                                                                              | -2.5509482 | 1.9883823  | C                      | -0.3565970                                                                      | 1.7629983  | -0.2528061 |
| H                        | 0.2684459                                                                               | -3.1752638 | -1.0831450 | C                      | -1.7088597                                                                      | -0.4588933 | -1.2223532 |
| H                        | 0.2215173                                                                               | -1.6912590 | 2.7030688  | C                      | -1.5006436                                                                      | -0.0593951 | 1.4545886  |
| H                        | -3.5132459                                                                              | -3.3680867 | 0.0348724  | C                      | -0.5031306                                                                      | 2.8041958  | 0.6561561  |
| H                        | -1.2458646                                                                              | -2.6773286 | 2.6223438  | C                      | 0.4989735                                                                       | 2.0662074  | -1.3209358 |
| H                        | -1.7742995                                                                              | -3.7077198 | 0.1089804  | C                      | -1.9300684                                                                      | -1.8430523 | -1.2368299 |
| H                        | -4.9854095                                                                              | -1.3381247 | 2.2141824  | C                      | -2.2504324                                                                      | 0.2110566  | -2.3174354 |
| H                        | 1.0279203                                                                               | -1.9429016 | -2.0935977 | C                      | -0.7398405                                                                      | -0.2265048 | 2.6151828  |
| H                        | -5.4493458                                                                              | 0.6210855  | 1.3772699  | C                      | -2.8706123                                                                      | -0.2137945 | 1.6514584  |
| H                        | -0.3697878                                                                              | 0.2259450  | -4.1211347 | C                      | 0.1406942                                                                       | 4.0350045  | 0.5538192  |
| H                        | -4.7245714                                                                              | 1.7700114  | 0.2433316  | F                      | -1.3376172                                                                      | 2.6858701  | 1.7397959  |
| H                        | 0.7972557                                                                               | 0.2051413  | -2.7905416 | C                      | 1.1564242                                                                       | 3.2793445  | -1.4717353 |
| H                        | 1.0459463                                                                               | 0.4281605  | 2.5336780  | F                      | 0.6397379                                                                       | 1.1907951  | -2.3547368 |
| H                        | -4.8919977                                                                              | -1.3357661 | 0.0680882  | C                      | -2.5607732                                                                      | -2.5145560 | -2.2785630 |
| H                        | -3.8913942                                                                              | -1.7473972 | 3.5418477  | F                      | -1.5892634                                                                      | -2.6130421 | -0.1748146 |
| H                        | -0.0438497                                                                              | -3.1484852 | -2.8259067 | C                      | -2.8823497                                                                      | -0.4209388 | -3.3866103 |
| H                        | -0.9505439                                                                              | -1.6512673 | 4.0309020  | F                      | -2.2192762                                                                      | 1.5746324  | -2.3959657 |
| H                        | -2.6886769                                                                              | -4.0909536 | -1.3508781 | C                      | -1.2802998                                                                      | -0.5688764 | 3.8514879  |
| H                        | 0.7161792                                                                               | 1.9749386  | 1.7470459  | F                      | 0.5959190                                                                       | -0.0155806 | 2.6074889  |
| H                        | -5.1932736                                                                              | -0.0580118 | -1.1158177 | C                      | -3.4581096                                                                      | -0.5589616 | 2.8658096  |
| H                        | -2.2423257                                                                              | 3.5889835  | 1.8021286  | F                      | -3.7487187                                                                      | -0.0001971 | 0.6244226  |
| H                        | -2.4262883                                                                              | 2.2726018  | -2.2446807 | C                      | 0.9885074                                                                       | 4.2751061  | -0.5187644 |
| H                        | -2.5976137                                                                              | 3.1582323  | 0.1272669  | F                      | -0.0854150                                                                      | 5.0290237  | 1.4635755  |
| H                        | -4.0254508                                                                              | 1.7199277  | -1.7265564 | F                      | 1.9851218                                                                       | 3.5028285  | -2.5291485 |
| H                        | -4.8343346                                                                              | 2.1793066  | 1.9490727  | C                      | -3.0318882                                                                      | -1.8006530 | -3.3754222 |
| H                        | -0.3457392                                                                              | 1.5461116  | -2.9492797 | F                      | -2.7448291                                                                      | -3.8620439 | -2.3261287 |
| H                        | 0.2156348                                                                               | 1.7109866  | 3.4278534  | F                      | -3.3703169                                                                      | 0.2956160  | -4.4370097 |
| H                        | -5.1708873                                                                              | -1.7490187 | -1.6234519 | C                      | -2.6529308                                                                      | -0.7460594 | 3.9810421  |
| H                        | -0.9198286                                                                              | 3.1850802  | 0.6983610  | F                      | -0.4863865                                                                      | -0.7142624 | 4.9461382  |
| H                        | -3.4682175                                                                              | 1.4022758  | -3.3728663 | F                      | -4.8069655                                                                      | -0.7046620 | 2.9831263  |
| N                        | 0.4374469                                                                               | -0.2875046 | 0.0629345  | F                      | 1.6584273                                                                       | 5.4538132  | -0.6233815 |
| N                        | 1.6248913                                                                               | -0.5571965 | 0.0701994  | F                      | -3.6275351                                                                      | -2.4413448 | -4.4143205 |
| C                        | 2.7820673                                                                               | 0.1101003  | -0.0801406 | F                      | -3.1948984                                                                      | -1.0914398 | 5.1762192  |
| C                        | 2.8198532                                                                               | 1.5604089  | -0.2497079 | N                      | 0.4887321                                                                       | -0.6911416 | -0.0705489 |
| C                        | 3.9731847                                                                               | -0.7438631 | -0.0052077 |                        |                                                                                 |            |            |

|   |           |            |            |   |           |            |            |
|---|-----------|------------|------------|---|-----------|------------|------------|
| N | 1.6475889 | -0.1301425 | -0.0998428 | C | 2.3061886 | 2.0899102  | -1.9923700 |
| C | 2.7876843 | -0.8605435 | -0.0840490 | C | 4.5004102 | 1.4513025  | -1.2093746 |
| C | 2.8049169 | -2.3310340 | -0.1163080 | C | 3.2031630 | -2.4642168 | -0.1454389 |
| C | 4.0194559 | -0.0826749 | -0.0138973 | C | 4.6752285 | -1.5969664 | -1.8500179 |
| C | 1.8257631 | -3.1110105 | 0.5403280  | C | 2.7769467 | 3.3748065  | -2.2506560 |
| C | 3.7771573 | -3.0308848 | -0.8662181 | H | 1.2660427 | 1.8450671  | -2.1766725 |
| C | 4.0308258 | 1.3084910  | -0.2961927 | C | 4.9663592 | 2.7369989  | -1.4699847 |
| C | 5.2533235 | -0.6407313 | 0.4072021  | H | 5.1726857 | 0.7169770  | -0.7774288 |
| C | 1.8369990 | -4.5021840 | 0.4608240  | C | 3.9854248 | -3.6102883 | -0.0518310 |
| H | 1.0542684 | -2.6039578 | 1.1035726  | H | 2.3214685 | -2.3454047 | 0.4766940  |
| C | 3.7877394 | -4.4208160 | -0.9420478 | C | 5.4610433 | -2.7445008 | -1.7505650 |
| H | 4.5283113 | -2.4628400 | -1.4084883 | H | 4.9361752 | -0.8296217 | -2.5728818 |
| C | 5.1818258 | 2.0742939  | -0.1718478 | C | 4.1096829 | 3.7083302  | -1.9962600 |
| H | 3.0936206 | 1.7670070  | -0.5870400 | H | 2.0953949 | 4.1225987  | -2.6486326 |
| C | 6.4062279 | 0.1310934  | 0.5234868  | H | 6.0019133 | 2.9850745  | -1.2506828 |
| H | 5.2938056 | -1.6926246 | 0.6738802  | C | 5.1244159 | -3.7574288 | -0.8501260 |
| C | 2.8154695 | -5.1735602 | -0.2764497 | H | 3.7132415 | -4.3898468 | 0.6553881  |
| H | 1.0709061 | -5.0696241 | 0.9868331  | H | 6.3358731 | -2.8504244 | -2.3873488 |
| H | 4.5539443 | -4.9198848 | -1.5324298 | H | 4.4730552 | 4.7130259  | -2.1943911 |
| C | 6.3931881 | 1.4981849  | 0.2329116  | H | 5.7405396 | -4.6489172 | -0.7702703 |
| H | 5.1377900 | 3.1385184  | -0.4007097 |   |           |            |            |
| H | 7.3271179 | -0.3419435 | 0.8604964  |   |           |            |            |
| H | 2.8206310 | -6.2595545 | -0.3348236 |   |           |            |            |
| H | 7.2954029 | 2.0975638  | 0.3237929  |   |           |            |            |

**Af** Ph<sub>2</sub>CNNB(C<sub>6</sub>F<sub>5</sub>)<sub>3</sub> adduct

59

Energy = -2820.778288281

|   |            |            |            |
|---|------------|------------|------------|
| B | -0.9369303 | 0.0172616  | -0.1387546 |
| C | -0.0624368 | -0.4518710 | 1.1594056  |
| C | -1.4464274 | 1.5515855  | 0.0536424  |
| C | -2.0759084 | -1.0205796 | -0.6739531 |
| C | -0.2369952 | -1.6232124 | 1.9018641  |
| C | 1.0213825  | 0.3342963  | 1.5698921  |
| C | -1.2718137 | 2.6057682  | -0.8383957 |
| C | -2.0962057 | 1.8910017  | 1.2431386  |
| C | -1.7038994 | -2.2929826 | -1.1172328 |
| C | -3.4432920 | -0.7527794 | -0.7778996 |
| C | 0.6330931  | -2.0253484 | 2.9137536  |
| F | -1.2878251 | -2.4436834 | 1.6750236  |
| C | 1.9113797  | -0.0242804 | 2.5763305  |
| F | 1.2557152  | 1.5295091  | 0.9671366  |
| C | -1.6743213 | 3.9127473  | -0.5710171 |
| F | -0.6725273 | 2.4027407  | -2.0409373 |
| C | -2.5266340 | 3.1763598  | 1.5475048  |
| F | -2.3637541 | 0.9280910  | 2.1589374  |
| C | -2.5894275 | -3.2469232 | -1.5997059 |
| F | -0.3955050 | -2.6591193 | -1.0665785 |
| C | -4.3704162 | -1.6789751 | -1.2552321 |
| F | -3.9585122 | 0.4431323  | -0.4098260 |
| C | 1.7211449  | -1.2259488 | 3.2496138  |
| F | 0.4306132  | -3.1813074 | 3.5725367  |
| F | 2.9452938  | 0.7733020  | 2.9006501  |
| C | -2.3060484 | 4.2021619  | 0.6327457  |
| F | -1.4575751 | 4.8948099  | -1.4671280 |
| F | -3.1603481 | 3.4368909  | 2.7062709  |
| C | -3.9441159 | -2.9352218 | -1.6674884 |
| F | -2.1585372 | -4.4598042 | -1.9940062 |
| F | -5.6771077 | -1.3627542 | -1.3260664 |
| F | 2.5672035  | -1.6022988 | 4.2201084  |
| F | -2.7071467 | 5.4541999  | 0.9072663  |
| F | -4.8258430 | -3.8354490 | -2.1287969 |
| N | 0.1171667  | 0.0166248  | -1.4239238 |
| N | 1.2862957  | -0.0493540 | -1.3299596 |
| C | 2.5693471  | -0.0711637 | -1.3025258 |
| C | 3.2651224  | 1.2284193  | -1.4278373 |
| C | 3.2634846  | -1.3612558 | -1.1154388 |
| C | 2.7403614  | 2.2439516  | -2.2395599 |
| C | 4.4426492  | 1.4492113  | -0.6980877 |
| C | 2.7026764  | -2.3720563 | -0.3208328 |
| C | 4.5129602  | -1.5628532 | -1.7223643 |

**Af**<sup>-</sup> Ph<sub>2</sub>CNNB(C<sub>6</sub>F<sub>5</sub>)<sub>3</sub><sup>-</sup> radical anion

59

Energy = -2820.906581298

|   |            |            |            |
|---|------------|------------|------------|
| B | -0.8515817 | 0.0626044  | 0.0058986  |
| C | -0.2302603 | -0.5269590 | 1.4132878  |
| C | -1.3781272 | 1.6132402  | 0.2014865  |
| C | -1.9886735 | -0.9157500 | -0.6849378 |
| C | -0.6778788 | -1.6363336 | 2.1272842  |
| C | 0.9126421  | 0.0741721  | 1.9503539  |
| C | -1.4355000 | 2.5228828  | -0.8583093 |
| C | -1.7776522 | 2.1470492  | 1.4273698  |
| C | -1.6401118 | -2.2089876 | -1.0928678 |
| C | -3.3037608 | -0.5616256 | -0.9865671 |
| C | -0.0247580 | -2.1540710 | 3.2447443  |
| F | -1.8239227 | -2.2796956 | 1.7779220  |
| C | 1.5995064  | -0.4048141 | 3.0598466  |
| F | 1.3977917  | 1.2169954  | 1.4009333  |
| C | -1.7875042 | 3.8618743  | -0.7165576 |
| F | -1.1856106 | 2.1222961  | -2.1307222 |
| C | -2.1448053 | 3.4775986  | 1.6166161  |
| F | -1.8582646 | 1.3646347  | 2.5368524  |
| C | -2.5003469 | -3.0773571 | -1.7547907 |
| F | -0.4100939 | -2.6979455 | -0.8123915 |
| C | -4.2002559 | -1.3965705 | -1.6540858 |
| F | -3.8121844 | 0.6460338  | -0.6218230 |
| C | 1.1298909  | -1.5395627 | 3.7121466  |
| F | -0.5082917 | -3.2418439 | 3.8878118  |
| F | 2.7057811  | 0.2212949  | 3.5187855  |
| C | -2.1397501 | 4.3500979  | 0.5363240  |
| F | -1.8101013 | 4.6890830  | -1.7863325 |
| F | -2.5128266 | 3.9268654  | 2.8376084  |
| C | -3.7965078 | -2.6651729 | -2.0457518 |
| F | -2.1009746 | -4.3198683 | -2.1071577 |
| F | -5.4609829 | -0.9848653 | -1.9208724 |
| F | 1.7761705  | -2.0254167 | 4.7917612  |
| F | -2.4892860 | 5.6427498  | 0.6959364  |
| F | -4.6476440 | -3.4880127 | -2.6917551 |
| N | 0.3193280  | 0.1455953  | -1.0503383 |
| N | 1.3893523  | -0.4808284 | -0.8959849 |
| C | 2.6583958  | -0.2502691 | -1.1648531 |
| C | 3.1616787  | 1.0961620  | -1.4761387 |
| C | 3.5322987  | -1.4325559 | -1.0462390 |

|   |           |            |            |
|---|-----------|------------|------------|
| C | 3.3933291 | 3.4697232  | -2.3240823 |
| H | 1.8336547 | 2.0684434  | -2.8096614 |
| C | 5.0903204 | 2.6781908  | -0.7910289 |
| H | 4.8354493 | 0.6692330  | -0.0539513 |
| C | 3.3833001 | -3.5710796 | -0.1361512 |
| H | 1.7456269 | -2.2073310 | 0.1610986  |
| C | 5.1894355 | -2.7646810 | -1.5284459 |
| H | 4.9452173 | -0.7850972 | -2.3435059 |
| C | 4.5684029 | 3.6891793  | -1.6015135 |
| H | 2.9879167 | 4.2513805  | -2.9588731 |
| H | 5.9999925 | 2.8488755  | -0.2237724 |
| C | 4.6287064 | -3.7696566 | -0.7365734 |
| H | 2.9472804 | -4.3460945 | 0.4868285  |
| H | 6.1560913 | -2.9165964 | -1.9985190 |
| H | 5.0766270 | 4.6462221  | -1.6700714 |
| H | 5.1623282 | -4.7028376 | -0.5842964 |

**Ah<sup>2-</sup>** Ph<sub>2</sub>CNNBPh<sub>3</sub><sup>2-</sup> with Ph = C<sub>6</sub>H<sub>5</sub>

59

Energy = -1331.681190069

|   |            |            |            |
|---|------------|------------|------------|
| B | -0.6644801 | 0.3106597  | 0.2369942  |
| C | -0.2929180 | -0.3782185 | 1.6736688  |
| C | -1.4592729 | 1.7193624  | 0.4739169  |
| C | -1.5897985 | -0.7165685 | -0.6449063 |
| C | -0.9308721 | -1.5075239 | 2.2126496  |
| C | 0.7416544  | 0.1765487  | 2.4528608  |
| C | -1.4009109 | 2.7327538  | -0.5031385 |
| C | -2.2560015 | 1.9897413  | 1.5998795  |
| C | -1.0263435 | -1.9176913 | -1.1249055 |
| C | -2.9490556 | -0.5081597 | -0.9395526 |
| C | -0.5696041 | -2.0542080 | 3.4502682  |
| H | -1.7241249 | -1.9831529 | 1.6373097  |
| C | 1.1145991  | -0.3497719 | 3.6888551  |
| H | 1.2762235  | 1.0346893  | 2.0503931  |
| C | -2.0980885 | 3.9361465  | -0.3726573 |
| H | -0.7766319 | 2.5555268  | -1.3762483 |
| C | -2.9608700 | 3.1894295  | 1.7493215  |
| H | -2.3180487 | 1.2373086  | 2.3860572  |
| C | -1.7717248 | -2.8534112 | -1.8422520 |
| H | 0.0288487  | -2.0972461 | -0.9254048 |
| C | -3.7128170 | -1.4408106 | -1.6511277 |
| H | -3.4261843 | 0.4068578  | -0.5908911 |
| C | 0.4574848  | -1.4762837 | 4.1987408  |
| H | -1.0863095 | -2.9361345 | 3.8290818  |
| H | 1.9233059  | 0.1091179  | 4.2575358  |
| C | -2.8858755 | 4.1736050  | 0.7596245  |
| H | -2.0260784 | 4.6975479  | -1.1493839 |
| H | -3.5652288 | 3.3613920  | 2.6397323  |
| C | -3.1284132 | -2.6254700 | -2.1069745 |
| H | -1.2993149 | -3.7701272 | -2.1951422 |
| H | -4.7672700 | -1.2462409 | -1.8479672 |
| H | 0.7473948  | -1.8981695 | 5.1594175  |
| H | -3.4294167 | 5.1108012  | 0.8685281  |
| H | -3.7167150 | -3.3574828 | -2.6577699 |
| N | 0.6393532  | 0.6676485  | -0.5643926 |
| N | 1.5073696  | -0.2717119 | -0.5679320 |
| C | 2.7499047  | -0.1522132 | -1.1654218 |
| C | 3.3009318  | 1.0818948  | -1.6943997 |
| C | 3.4889415  | -1.4034176 | -1.1390647 |
| C | 2.4701302  | 2.1584142  | -2.1277122 |
| C | 4.7021811  | 1.3410442  | -1.7183370 |
| C | 3.1151961  | -2.4511982 | -0.2443981 |
| C | 4.5589601  | -1.7099385 | -2.0260127 |
| C | 3.0089879  | 3.3669494  | -2.5646457 |
| H | 1.3989201  | 2.0140344  | -2.0678696 |
| C | 5.2314490  | 2.5464438  | -2.1648034 |
| H | 5.3828480  | 0.5781218  | -1.3508446 |

|   |           |            |            |
|---|-----------|------------|------------|
| C | 3.7610345 | -3.6800963 | -0.2408964 |
| H | 2.2948230 | -2.2529403 | 0.4380290  |
| C | 5.2060534 | -2.9434551 | -2.0119019 |
| H | 4.8594191 | -0.9727312 | -2.7652397 |
| C | 4.3916823 | 3.5830817  | -2.6031616 |
| H | 2.3314477 | 4.1576675  | -2.8869950 |
| H | 6.3121246 | 2.6869478  | -2.1613482 |
| C | 4.8252101 | -3.9516630 | -1.1176177 |
| H | 3.4393157 | -4.4425888 | 0.4681010  |
| H | 6.0121537 | -3.1253330 | -2.7225611 |
| H | 4.8042397 | 4.5263243  | -2.9542067 |
| H | 5.3345278 | -4.9126597 | -1.1050802 |

**Ah<sup>-</sup>** Ph<sub>2</sub>CNNBPh<sub>3</sub><sup>-</sup> radical anion

59

Energy = -1331.629800517

|   |            |            |            |
|---|------------|------------|------------|
| B | -0.7930921 | 0.1804442  | 0.0204556  |
| C | -0.2201038 | -0.4027230 | 1.4283049  |
| C | -1.4512926 | 1.6558849  | 0.1967458  |
| C | -1.8367473 | -0.8656124 | -0.6784767 |
| C | -0.8309459 | -1.4563630 | 2.1275419  |
| C | 0.9431992  | 0.1410174  | 2.0069935  |
| C | -1.4673607 | 2.5917529  | -0.8528784 |
| C | -2.0822600 | 2.0423135  | 2.0313395  |
| C | -1.3805906 | -2.1105914 | -1.1519445 |
| C | -3.2112614 | -0.6071451 | -0.8065911 |
| C | -0.3129761 | -1.9519894 | 3.3288326  |
| H | -1.7284694 | -1.9115303 | 1.7132919  |
| C | 1.4798857  | -0.3490362 | 3.1975722  |
| H | 1.4492234  | 0.9613856  | 1.5005773  |
| C | -2.0719181 | 3.8439453  | -0.7225216 |
| H | -0.9893516 | 2.3281386  | -1.7942996 |
| C | -2.7023352 | 3.2867657  | 1.5349119  |
| H | -2.0816332 | 1.3497282  | 2.2314334  |
| C | -2.2440477 | -3.0471920 | -1.7210816 |
| H | -0.3208356 | -2.3459706 | -1.0705883 |
| C | -4.0907435 | -1.5392093 | -1.3686274 |
| H | -3.6014199 | 0.3464805  | -0.4559759 |
| C | 0.8518463  | -1.4039169 | 3.8675064  |
| H | -0.8139654 | -2.7725093 | 3.8398131  |
| H | 2.3907595  | 0.0866457  | 3.6043247  |
| C | -2.6972049 | 4.1980077  | 0.4763568  |
| H | -2.0575888 | 4.5459954  | -1.5546144 |
| H | -3.1824750 | 3.5508667  | 2.4756332  |
| C | -3.6098919 | -2.7654013 | -1.8315344 |
| H | -1.8556489 | -3.9988733 | -2.0794636 |
| H | -5.1511838 | -1.3063848 | -1.4490562 |
| H | 1.2677129  | -1.7932488 | 4.7941305  |
| H | -3.1702070 | 5.1715429  | 0.5846374  |
| H | -4.2877456 | -3.4917586 | -2.2740725 |
| N | 0.4104490  | 0.3491079  | -1.0143422 |
| N | 1.4313030  | -0.3576291 | -0.9454887 |
| C | 2.7196164  | -0.1784589 | -1.2106105 |
| C | 3.2920279  | 1.1502062  | -1.4363105 |
| C | 3.5134676  | -1.4199501 | -1.1504350 |
| C | 2.4687331  | 2.2661354  | -1.7116322 |
| C | 4.6841255  | 1.3825635  | -1.3388918 |
| C | 3.1508164  | -2.4328765 | -0.2388544 |
| C | 4.6054049  | -1.6652251 | -2.0043560 |
| C | 3.0139629  | 3.5313492  | -1.9169914 |
| H | 1.3930606  | 2.1266702  | -1.7460526 |
| C | 5.2218485  | 2.6490357  | -1.5451378 |
| H | 5.3454528  | 0.5614708  | -1.0833353 |
| C | 3.8472037  | -3.6365830 | -0.1890371 |
| H | 2.3186712  | -2.2472897 | 0.4341863  |
| C | 5.3085998  | -2.8683773 | -1.9445224 |
| H | 4.8885142  | -0.9171291 | -2.7390412 |

|   |           |            |            |
|---|-----------|------------|------------|
| C | 4.3940965 | 3.7359202  | -1.8455761 |
| H | 2.3510034 | 4.3668724  | -2.1297488 |
| H | 6.2970524 | 2.7908082  | -1.4630771 |
| C | 4.9364496 | -3.8629002 | -1.0372047 |
| H | 3.5493682 | -4.3990260 | 0.5269907  |
| H | 6.1450065 | -3.0331088 | -2.6196009 |
| H | 4.8166318 | 4.7241162  | -2.0061805 |
| H | 5.4861511 | -4.7993950 | -0.9911788 |

**Ah** Ph<sub>2</sub>CNN.BPh<sub>3</sub> adduct (**INT1** in text)

59

Energy = -1331.520153428

|   |            |            |            |
|---|------------|------------|------------|
| B | -0.9429423 | -0.0937182 | -0.1382554 |
| C | -0.0633409 | -0.5631053 | 1.1239515  |
| C | -1.2973916 | 1.4842269  | -0.2407666 |
| C | -2.1493071 | -1.0695698 | -0.5504926 |
| C | -0.2900580 | -1.7917171 | 1.7706984  |
| C | 1.0450910  | 0.1883578  | 1.5657475  |
| C | -1.7170492 | 2.0457100  | -1.4623509 |
| C | -1.2288077 | 2.3423218  | 0.8688612  |
| C | -1.9240889 | -2.3301038 | -1.1323768 |
| C | -3.4837718 | -0.7170625 | -0.2902168 |
| C | 0.5462737  | -2.2550669 | 2.7891747  |
| H | -1.1362973 | -2.4004366 | 1.4624271  |
| C | 1.8938409  | -0.2680413 | 2.5745637  |
| H | 1.2536801  | 1.1525959  | 1.1076618  |
| C | -2.0290533 | 3.4000808  | -1.5790378 |
| H | -1.8012760 | 1.4052099  | -2.3377166 |
| C | -1.5556580 | 3.6967123  | 0.7667038  |
| H | -0.9246114 | 1.9432332  | 1.8328153  |
| C | -2.9731414 | -3.1971026 | -1.4430706 |
| H | -0.9035510 | -2.6455387 | -1.3468624 |
| C | -4.5422081 | -1.5797726 | -0.5837019 |
| H | -3.6971599 | 0.2555714  | 0.1482475  |
| C | 1.6494433  | -1.4980569 | 3.1884579  |
| H | 0.3411440  | -3.2098677 | 3.2672766  |
| H | 2.7474336  | 0.3329359  | 2.8784042  |
| C | -1.9460501 | 4.2337053  | -0.4609636 |
| H | -2.3415941 | 3.8055101  | -2.5383130 |
| H | -1.5025116 | 4.3336632  | 1.6464578  |
| C | -4.2902953 | -2.8244253 | -1.1649252 |
| H | -2.7655193 | -4.1627986 | -1.8979320 |
| H | -5.5644307 | -1.2789804 | -0.3662648 |
| H | 2.3111954  | -1.8618567 | 3.9699446  |
| H | -2.1896966 | 5.2895875  | -0.5449479 |
| H | -5.1115648 | -3.4960320 | -1.4013553 |
| N | 0.1289108  | -0.1629506 | -1.4751899 |
| N | 1.2936319  | -0.1571241 | -1.3729168 |
| C | 2.5664971  | -0.0483034 | -1.2228082 |
| C | 3.1167358  | 1.3146597  | -1.1059560 |
| C | 3.3452481  | -1.3050785 | -1.1355025 |
| C | 2.3398875  | 2.4374105  | -1.4421450 |
| C | 4.4073197  | 1.5009294  | -0.5858521 |
| C | 2.8800953  | -2.3567464 | -0.3325031 |
| C | 4.5395798  | -1.4501822 | -1.8561329 |
| C | 2.8523722  | 3.7182963  | -1.2702011 |
| H | 1.3334182  | 2.3119699  | -1.8306147 |
| C | 4.9144801  | 2.7886026  | -0.4233495 |
| H | 5.0023203  | 0.6420980  | -0.2950617 |
| C | 3.6060775  | -3.5428517 | -0.2541294 |
| H | 1.9694981  | -2.2291857 | 0.2459459  |
| C | 5.2619796  | -2.6381948 | -1.7675880 |
| H | 4.8915838  | -0.6417606 | -2.4893545 |
| C | 4.1426609  | 3.9003615  | -0.7643016 |
| H | 2.2414246  | 4.5772350  | -1.5308327 |
| H | 5.9141033  | 2.9208418  | -0.0202191 |
| C | 4.7972302  | -3.6860944 | -0.9687177 |

|   |           |            |            |
|---|-----------|------------|------------|
| H | 3.2465065 | -4.3517254 | 0.3749297  |
| H | 6.1850703 | -2.7478410 | -2.3288825 |
| H | 4.5399546 | 4.9020454  | -0.6313875 |
| H | 5.3645381 | -4.6096600 | -0.9012027 |

**Bf**<sup>++</sup> (cyclized **Af**<sup>++</sup>)

59

Energy = -2820.899909686

|   |            |            |            |
|---|------------|------------|------------|
| B | 1.3302937  | 0.1543458  | -0.0384461 |
| C | 1.9720784  | -0.0280099 | 1.4782446  |
| C | 2.1421784  | -0.7053231 | -1.2005835 |
| C | 1.3327826  | 1.7908090  | -0.2784346 |
| C | 3.2787530  | 0.4017110  | 1.7175790  |
| C | 1.2957426  | -0.4691051 | 2.6160157  |
| C | 1.7190891  | -0.5935411 | -2.5304378 |
| C | 3.1641528  | -1.6351981 | -1.0134982 |
| C | 0.6012652  | 2.6139516  | 0.5868591  |
| C | 2.0561220  | 2.4906336  | -1.2446949 |
| C | 3.9011596  | 0.3670636  | 2.9587033  |
| F | 4.0222628  | 0.8796274  | 0.6829905  |
| C | 1.8802899  | -0.5264950 | 3.8817828  |
| F | -0.0003124 | -0.8588599 | 2.5640326  |
| C | 2.2876160  | -1.2802036 | -3.5957742 |
| F | 0.7013382  | 0.2475175  | -2.8430585 |
| C | 3.7701205  | -2.3452237 | -2.0501356 |
| F | 3.6353969  | -1.9315618 | 0.2269431  |
| C | 0.5184109  | 3.9968760  | 0.4616130  |
| F | -0.0532383 | 2.0903540  | 1.6505537  |
| C | 2.0099918  | 3.8754323  | -1.4013459 |
| F | 2.8933826  | 1.8519010  | -2.1030744 |
| C | 3.1927674  | -0.1091522 | 4.0576909  |
| F | 5.1791997  | 0.7811382  | 3.1133588  |
| C | 1.1759214  | -0.9736390 | 4.9462048  |
| F | 3.3370255  | -2.1608951 | -3.3553834 |
| F | 1.8447133  | -1.1002262 | -4.8597399 |
| F | 4.7707930  | -3.2166685 | -1.7951130 |
| C | 1.2230269  | 4.6386755  | -0.5502509 |
| F | -0.2264487 | 4.7269283  | 1.3228008  |
| F | 2.7349178  | 4.4842316  | -2.3674543 |
| F | 3.7714221  | -0.1586092 | 5.2752044  |
| F | 3.9149609  | -2.8315795 | -4.3708163 |
| F | 1.1631964  | 5.9793305  | -0.6859219 |
| N | -0.1237244 | -0.3731052 | -0.1288465 |
| N | -1.1905026 | 0.4149116  | -0.1920165 |
| C | -2.3159159 | -0.3210849 | -0.2803092 |
| C | -2.0143532 | -1.7088327 | -0.2533020 |
| C | -3.6081322 | 0.3612710  | -0.2763814 |
| C | -0.5154969 | -1.7795458 | -0.3666431 |
| C | -2.7466312 | -2.8614126 | 0.0317820  |
| C | -3.7282336 | 1.6552719  | 0.2688952  |
| C | -4.7592306 | -0.2476042 | -0.8071501 |
| C | 0.1006600  | -2.8939385 | 0.4209932  |
| C | -2.0776291 | -4.0127155 | 0.4512172  |
| H | -3.8328765 | -2.8416629 | 0.0307519  |
| C | -4.9561067 | 2.3095373  | 0.2827921  |
| H | -2.8426163 | 2.1285117  | 0.6813538  |
| C | -5.9888423 | 0.4104619  | -0.7883546 |
| H | -4.6840497 | -1.2313813 | -1.2608942 |
| C | -0.6704060 | -3.9766840 | 0.7193918  |
| H | 1.1585392  | -2.8591411 | 0.6580216  |
| H | -2.6438617 | -4.9035610 | 0.7077202  |
| C | -6.0961365 | 1.6913629  | -0.2430501 |
| H | -5.0285681 | 3.3055380  | 0.7118437  |
| H | -6.8647600 | -0.0759256 | -1.2096650 |
| H | -0.2203082 | -4.8294588 | 1.2232731  |
| H | -7.0541855 | 2.2030047  | -0.2272866 |
| H | -0.2592688 | -1.9650664 | -1.4419395 |

**Bh<sup>2-</sup>** (INT2 in text)

59

Energy = -1331.622109290

|   |            |            |            |
|---|------------|------------|------------|
| B | 1.3142764  | 0.2404856  | -0.0845892 |
| C | 1.9116557  | -0.0104844 | 1.4172087  |
| C | 2.1111606  | -0.5791583 | -1.2575186 |
| C | 1.3639526  | 1.8542699  | -0.3267810 |
| C | 3.2484373  | 0.3145477  | 1.7184295  |
| C | 1.1249667  | -0.4660505 | 2.4883104  |
| C | 1.6634323  | -0.4624018 | -2.5885475 |
| C | 3.1903065  | -1.4484980 | -1.0390460 |
| C | 0.5755495  | 2.7362613  | 0.4392918  |
| C | 2.2884766  | 2.4482957  | -1.2025004 |
| C | 3.7776605  | 0.1744190  | 3.0020515  |
| H | 3.8862969  | 0.7025514  | 0.9254746  |
| C | 1.6382333  | -0.6089655 | 3.7807640  |
| H | 0.0823406  | -0.7168757 | 2.3064454  |
| C | 2.2535230  | -1.1644624 | -3.6396999 |
| H | 0.8250629  | 0.2008738  | -2.7991138 |
| C | 3.7964688  | -2.1595338 | -2.0808526 |
| H | 3.5624538  | -1.5821925 | -0.0251981 |
| C | 0.6826111  | 4.1212304  | 0.3200574  |
| H | -0.1399556 | 2.3221570  | 1.1433679  |
| C | 2.4201700  | 3.8367306  | -1.3206249 |
| H | 2.9259079  | 1.8073640  | -1.8079023 |
| C | 2.9716614  | -0.2927288 | 4.0453550  |
| H | 4.8167162  | 0.4357379  | 3.1948349  |
| H | 0.9954384  | -0.9673665 | 4.5828699  |
| C | 3.3302784  | -2.0210714 | -3.3886833 |
| H | 1.8756117  | -1.0483771 | -4.6537303 |
| H | 4.6291282  | -2.8279176 | -1.8695496 |
| C | 1.6107158  | 4.6832930  | -0.5631124 |
| H | 0.0477857  | 4.7688636  | 0.9222227  |
| H | 3.1533638  | 4.2562748  | -2.0073892 |
| H | 3.3773676  | -0.4023408 | 5.0485490  |
| H | 3.7947007  | -2.5745185 | -4.2017506 |
| H | 1.7022219  | 5.7631911  | -0.6547387 |
| N | -0.1674201 | -0.3102513 | -0.1397790 |
| N | -1.2610380 | 0.4256622  | -0.1684275 |
| C | -2.3710265 | -0.3540524 | -0.2160581 |
| C | -2.0144602 | -1.7281635 | -0.1754948 |
| C | -3.6774331 | 0.2928972  | -0.2079019 |
| C | -0.5177569 | -1.7349008 | -0.3450073 |
| C | -2.6795862 | -2.9131658 | 0.1452318  |
| C | -3.7851454 | 1.6686200  | 0.0897390  |
| C | -4.8624237 | -0.4113441 | -0.5009625 |
| C | 0.1793355  | -2.8064656 | 0.4299508  |
| C | -1.9390029 | -4.0293575 | 0.5456705  |
| H | -3.7637927 | -2.9526945 | 0.1905616  |
| C | -5.0218460 | 2.3041969  | 0.1032253  |
| H | -2.8750132 | 2.2194386  | 0.3059582  |
| C | -6.1015395 | 0.2289974  | -0.4805336 |
| H | -4.8121153 | -1.4609104 | -0.7697703 |
| C | -0.5272720 | -3.9238497 | 0.7618667  |
| H | 1.2431031  | -2.7146664 | 0.6131963  |
| H | -2.4522207 | -4.9447592 | 0.8265569  |
| C | -6.1930740 | 1.5885034  | -0.1757524 |
| H | -5.0780574 | 3.3646111  | 0.3359797  |
| H | -6.9998284 | -0.3377855 | -0.7125480 |
| H | -0.0157152 | -4.7524030 | 1.2481805  |
| H | -7.1586662 | 2.0859780  | -0.1601276 |
| H | -0.2814604 | -1.9129122 | -1.4254861 |

**cf<sup>-</sup>**

58

Energy = -2820.376796892

|   |            |            |            |
|---|------------|------------|------------|
| B | 1.3183512  | 0.1565454  | 0.0618419  |
| C | 2.0034721  | -0.0162137 | 1.5577859  |
| C | 2.0763056  | -0.7103884 | -1.1287794 |
| C | 1.3214933  | 1.7871390  | -0.1967834 |
| C | 3.3223009  | 0.4063260  | 1.7445807  |
| C | 1.3659521  | -0.4249928 | 2.7300044  |
| C | 1.5956570  | -0.5944359 | -2.4378070 |
| C | 3.0908929  | -1.6549330 | -0.9841777 |
| C | 0.5973946  | 2.6213910  | 0.6634375  |
| C | 2.0430670  | 2.4736294  | -1.1741093 |
| C | 3.9827809  | 0.4080428  | 2.9665408  |
| F | 4.0377949  | 0.8490276  | 0.6769156  |
| C | 1.9888802  | -0.4444765 | 3.9786635  |
| F | 0.0692347  | -0.8165221 | 2.7355648  |
| C | 2.0939696  | -1.3054265 | -3.5220585 |
| F | 0.5899241  | 0.2710889  | -2.7100643 |
| C | 3.6207286  | -2.3976217 | -2.0393970 |
| F | 3.6138410  | -1.9492850 | 0.2371917  |
| C | 0.5209460  | 4.0029290  | 0.5255586  |
| F | -0.0608955 | 2.1067674  | 1.7289966  |
| C | 2.0029055  | 3.8570545  | -1.3434616 |
| F | 2.8669443  | 1.8237517  | -2.0360945 |
| C | 3.3065627  | -0.0266423 | 4.1022982  |
| F | 5.2661808  | 0.8213105  | 3.0669343  |
| F | 1.3137402  | -0.8538067 | 5.0763846  |
| C | 3.1248283  | -2.2179309 | -3.3225906 |
| F | 1.5965607  | -1.1210618 | -4.7650872 |
| C | 4.6001763  | -3.3035627 | -1.8211008 |
| C | 1.2259304  | 4.6314056  | -0.4941999 |
| F | -0.2243884 | 4.7444971  | 1.3761662  |
| F | 2.7207623  | 4.4524957  | -2.3229677 |
| F | 3.9190517  | -0.0357994 | 5.3035349  |
| F | 3.6240490  | -2.9239539 | -4.3565069 |
| F | 1.1716071  | 5.9706168  | -0.6418666 |
| N | -0.1582541 | -0.3596418 | 0.0161263  |
| N | -1.2164141 | 0.4702624  | -0.1534527 |
| C | -2.3316880 | -0.2671080 | -0.1990337 |
| C | -2.0020929 | -1.6579559 | -0.0690050 |
| C | -3.6324940 | 0.3951356  | -0.2983198 |
| C | -0.5857119 | -1.6646907 | 0.0686486  |
| C | -2.7084106 | -2.8739543 | 0.0011048  |
| C | -3.7618675 | 1.7430512  | 0.0911593  |
| C | -4.7807488 | -0.2765364 | -0.7546054 |
| C | 0.1306800  | -2.8547300 | 0.2719770  |
| C | -1.9964291 | -4.0508407 | 0.1845890  |
| H | -3.7908415 | -2.9017376 | -0.0710429 |
| C | -4.9923974 | 2.3897190  | 0.0283942  |
| H | -2.8792592 | 2.2623166  | 0.4520122  |
| C | -6.0152596 | 0.3716042  | -0.8062779 |
| H | -4.7060765 | -1.3055554 | -1.0900454 |
| C | -0.5897107 | -4.0385911 | 0.3178446  |
| H | 1.2048949  | -2.8533932 | 0.4139098  |
| H | -2.5272612 | -4.9974883 | 0.2391808  |
| C | -6.1305120 | 1.7068199  | -0.4147672 |
| H | -5.0696763 | 3.4288422  | 0.3383141  |
| H | -6.8906935 | -0.1708715 | -1.1542006 |
| H | -0.0632486 | -4.9762967 | 0.4736008  |
| H | -7.0933392 | 2.2090611  | -0.4516967 |

**Ch<sup>-</sup>** (3<sup>-</sup> in text)

58

Energy = -1331.096611578

|   |            |            |            |
|---|------------|------------|------------|
| B | -0.4254325 | 0.2716553  | 0.1741873  |
| C | -0.2204987 | 0.0773981  | 1.7831965  |
| C | -1.1719221 | 1.6839433  | -0.1550113 |
| C | -1.2581566 | -0.9866857 | -0.4718997 |
| C | -1.1891232 | -0.5615021 | 2.5770850  |

|   |            |            |            |
|---|------------|------------|------------|
| C | 0.9017642  | 0.5874994  | 2.4612310  |
| C | -1.2895215 | 2.1614705  | -1.4758928 |
| C | -1.7335042 | 2.4899200  | 0.8479798  |
| C | -0.8604771 | -2.3183477 | -0.2315869 |
| C | -2.4017742 | -0.8216289 | -1.2707709 |
| C | -1.0545870 | -0.6883914 | 3.9623409  |
| H | -2.0690972 | -0.9799152 | 2.0923261  |
| C | 1.0540894  | 0.4681803  | 3.8445463  |
| H | 1.6834317  | 1.0841230  | 1.8894037  |
| C | -1.9111361 | 3.3725926  | -1.7788476 |
| H | -0.8561771 | 1.5770108  | -2.2856041 |
| C | -2.3589958 | 3.7081002  | 0.5633015  |
| H | -1.6599512 | 2.1647468  | 1.8834617  |
| C | -1.5279551 | -3.4083865 | -0.7902045 |
| H | 0.0065400  | -2.4948190 | 0.3968470  |
| C | -3.0876689 | -1.9039370 | -1.8344258 |
| H | -2.7705579 | 0.1824398  | -1.4654064 |
| C | 0.0723877  | -0.1716219 | 4.6058193  |
| H | -1.8261621 | -1.1958330 | 4.5395524  |
| H | 1.9409693  | 0.8707347  | 4.3310343  |
| C | -2.4486337 | 4.1585718  | -0.7546327 |
| H | -1.9694285 | 3.7126627  | -2.8109847 |
| H | -2.7669043 | 4.3105348  | 1.3735532  |
| C | -2.6452114 | -3.2067068 | -1.6073219 |
| H | -1.1797519 | -4.4205614 | -0.5903591 |
| H | -3.9676814 | -1.7272812 | -2.4507200 |
| H | 0.1883041  | -0.2722320 | 5.6826652  |
| H | -2.9243398 | 5.1101344  | -0.9817921 |
| H | -3.1646844 | -4.0523979 | -2.0531112 |
| N | 1.0368586  | 0.3024866  | -0.4866214 |
| N | 1.6883785  | -0.8665923 | -0.6688310 |
| C | 2.9370240  | -0.6214008 | -1.0946000 |
| C | 3.1283828  | 0.7945649  | -1.2113097 |
| C | 3.8511176  | -1.7485231 | -1.2922184 |
| C | 1.8829624  | 1.3493062  | -0.7763866 |
| C | 4.1631644  | 1.6595970  | -1.6236736 |
| C | 3.3822719  | -3.0714373 | -1.1357509 |
| C | 5.2145885  | -1.5735163 | -1.5933308 |
| C | 1.7040974  | 2.7426624  | -0.6731945 |
| C | 3.9625554  | 3.0300989  | -1.5559630 |
| H | 5.1062607  | 1.2783273  | -2.0004921 |
| C | 4.2415433  | -4.1585783 | -1.2603585 |
| H | 2.3322110  | -3.2205109 | -0.9039609 |
| C | 6.0729128  | -2.6661994 | -1.7235070 |
| H | 5.6203020  | -0.5754367 | -1.7068224 |
| C | 2.7484546  | 3.5628175  | -1.0673640 |
| H | 0.7814346  | 3.1617462  | -0.2956866 |
| H | 4.7514682  | 3.7066265  | -1.8739068 |
| C | 5.5974959  | -3.9668720 | -1.5524567 |
| H | 3.8549454  | -5.1660465 | -1.1247995 |
| H | 7.1217347  | -2.4934496 | -1.9524102 |
| H | 2.6302529  | 4.6415351  | -1.0004898 |
| H | 6.2715263  | -4.8154999 | -1.6394653 |

**Cn<sup>-</sup>** Ph<sub>2</sub>CNNH<sup>-</sup>  
26

Energy = -611.9337590283

|   |           |            |            |
|---|-----------|------------|------------|
| N | 0.2973065 | 0.7198764  | -1.5406591 |
| N | 1.1169210 | -0.2854097 | -1.3295770 |
| C | 2.4545848 | -0.1068523 | -1.3020228 |
| C | 3.1297919 | 1.1911647  | -1.4597883 |
| C | 3.2200951 | -1.3354829 | -1.0804869 |
| C | 2.6234653 | 2.2092231  | -2.3020178 |
| C | 4.3054347 | 1.4970508  | -0.7344921 |
| C | 2.6065405 | -2.4927908 | -0.5338520 |
| C | 4.5845880 | -1.4674269 | -1.4415926 |
| C | 3.2696881 | 3.4390453  | -2.4245538 |

|   |            |            |            |
|---|------------|------------|------------|
| H | 1.7096209  | 2.0210976  | -2.8505747 |
| C | 4.9469960  | 2.7265614  | -0.8542544 |
| H | 4.7136000  | 0.7518000  | -0.0575527 |
| C | 3.3013099  | -3.6858202 | -0.3706947 |
| H | 1.5606790  | -2.4247381 | -0.2513128 |
| C | 5.2803229  | -2.6622528 | -1.2682816 |
| H | 5.1002717  | -0.6218716 | -1.8869785 |
| C | 4.4370213  | 3.7129349  | -1.7058790 |
| H | 2.8551464  | 4.1942295  | -3.0899506 |
| H | 5.8473186  | 2.9193155  | -0.2740481 |
| C | 4.6517637  | -3.7900662 | -0.7312675 |
| H | 2.7875060  | -4.5460708 | 0.0549377  |
| H | 6.3251570  | -2.7161626 | -1.5687309 |
| H | 4.9329644  | 4.6761227  | -1.7953402 |
| H | 5.1948301  | -4.7221729 | -0.5990443 |
| H | -0.6384055 | 0.2926075  | -1.4696229 |

**Cn<sup>+</sup>** Ph<sub>2</sub>CNNH<sup>+</sup>

26

Energy = -611.8183764767

|   |            |            |            |
|---|------------|------------|------------|
| N | 0.3418236  | 0.7377854  | -1.2785209 |
| N | 1.1588316  | -0.2534635 | -1.4526547 |
| C | 2.4780406  | -0.1317077 | -1.3491487 |
| C | 3.1451308  | 1.1739865  | -1.4846227 |
| C | 3.2342013  | -1.3700626 | -1.1243138 |
| C | 2.6270891  | 2.1734522  | -2.3292176 |
| C | 4.2965437  | 1.4656929  | -0.7271149 |
| C | 2.6216133  | -2.4610819 | -0.4765179 |
| C | 4.5652570  | -1.5086920 | -1.5601339 |
| C | 3.2383135  | 3.4212867  | -2.4120470 |
| H | 1.7573551  | 1.9594629  | -2.9404065 |
| C | 4.8979382  | 2.7188975  | -0.8034864 |
| H | 4.6977137  | 0.7149079  | -0.0539053 |
| C | 3.3203164  | -3.6439687 | -0.2635631 |
| H | 1.5944126  | -2.3627921 | -0.1393061 |
| C | 5.2616762  | -2.6966381 | -1.3481812 |
| H | 5.0448053  | -0.6895749 | -2.0868793 |
| C | 4.3743704  | 3.7006825  | -1.6484953 |
| H | 2.8286240  | 4.1768013  | -3.0763748 |
| H | 5.7738407  | 2.9312792  | -0.1971455 |
| C | 4.6453021  | -3.7668639 | -0.6960334 |
| H | 2.8349191  | -4.4725039 | 0.2445577  |
| H | 6.2848110  | -2.7902481 | -1.7011330 |
| H | 4.8486607  | 4.6758765  | -1.7109447 |
| H | 5.1906387  | -4.6910389 | -0.5280230 |
| H | -0.5285728 | 0.5017288  | -1.7795297 |

**Dco** Cp\*CoC<sub>5</sub>(=CH<sub>2</sub>)Me<sub>4</sub>

50

Energy = -2163.024531970

|    |            |            |            |
|----|------------|------------|------------|
| Co | 0.0235156  | -0.0760027 | -0.0980577 |
| C  | -0.0831927 | -1.9668568 | -2.7137622 |
| C  | 2.7883156  | 0.7260175  | -1.3319673 |
| C  | -0.3721951 | -1.7423453 | -1.2607564 |
| C  | 1.5633211  | 1.1004039  | -0.5565282 |
| C  | 1.8390622  | -2.7161179 | -0.2633630 |
| C  | 0.0424861  | 1.8743041  | -2.5472836 |
| C  | 0.4898398  | -2.0733746 | -0.1634974 |
| C  | 0.3322171  | 1.6157063  | -1.1011654 |
| C  | -1.5771468 | -1.1777465 | -0.7148433 |
| C  | 1.4186463  | 1.0750144  | 0.8768070  |
| C  | -0.2058725 | -1.7536176 | 1.0659097  |
| C  | -0.5411938 | 1.8951141  | 0.0109626  |
| C  | -2.7688232 | -0.7335786 | -1.5060123 |
| C  | 2.4788974  | 0.6539514  | 1.8449714  |
| C  | -1.4814628 | -1.2100199 | 0.7302832  |
| C  | 0.2042217  | 1.7978914  | 1.2689006  |

|   |            |            |            |
|---|------------|------------|------------|
| C | 0.2893268  | -1.9698460 | 2.4614900  |
| C | -1.9153226 | 2.4796465  | -0.0861132 |
| C | -2.4882935 | -0.7197097 | 1.7231560  |
| C | -0.2146643 | 2.1371984  | 2.5263960  |
| H | 0.9885369  | -1.8945108 | -2.9230709 |
| H | 2.5320536  | 0.3503222  | -2.3271540 |
| H | 2.4870691  | -2.4160990 | 0.5654434  |
| H | -1.0233131 | 1.7629313  | -2.7672772 |
| H | 2.3400562  | -2.4485856 | -1.1980755 |
| H | 0.5962004  | 1.1872917  | -3.1937031 |
| H | -0.5995205 | -1.2335028 | -3.3400536 |
| H | 3.3660232  | -0.0459842 | -0.8159443 |
| H | -2.4737986 | -0.2979240 | -2.4652570 |
| H | 3.1016029  | 1.5151221  | 2.1275276  |
| H | -3.3558884 | 0.0109985  | -0.9623749 |
| H | 3.1396535  | -0.1083863 | 1.4221544  |
| H | 1.3745370  | -2.0959690 | 2.4893698  |
| H | -2.3744090 | 2.2850900  | -1.0587115 |
| H | -0.4147910 | -2.9645258 | -3.0331019 |
| H | 3.4448794  | 1.5970714  | -1.4637630 |
| H | 1.7537872  | -3.8110388 | -0.2349319 |
| H | 0.3309375  | 2.8977697  | -2.8236961 |
| H | 0.0250622  | -1.1232983 | 3.1052171  |
| H | -2.5714182 | 2.0790946  | 0.6932924  |
| H | -2.8540040 | -1.5394690 | 2.3542735  |
| H | 0.3910467  | 1.9161903  | 3.3997901  |
| H | -3.3520687 | -0.2700501 | 1.2265344  |
| H | -1.1881785 | 2.5880567  | 2.6912450  |
| H | -3.4295535 | -1.5846761 | -1.7200558 |
| H | 2.0396122  | 0.2575296  | 2.7649799  |
| H | -0.1618207 | -2.8719769 | 2.8961146  |
| H | -1.8757193 | 3.5697101  | 0.0531793  |
| H | -2.0413182 | 0.0385586  | 2.3831089  |

**Dco<sup>+</sup>** Cp\*CoC<sub>5</sub>(=CH<sub>2</sub>)Me<sub>4</sub><sup>+</sup> (singlet)

50

Energy = -2162.876969460

|    |            |            |            |
|----|------------|------------|------------|
| Co | -0.0092597 | -0.0318889 | 0.0177430  |
| C  | -0.0292886 | -1.8439950 | -2.6443679 |
| C  | 2.7691652  | 0.6968232  | -1.4131918 |
| C  | -0.3513768 | -1.6634337 | -1.1961522 |
| C  | 1.5783846  | 1.1069412  | -0.6089460 |
| C  | 1.8527940  | -2.6368102 | -0.1875097 |
| C  | 0.0377357  | 1.8366917  | -2.5906488 |
| C  | 0.4946258  | -2.0209456 | -0.0900258 |
| C  | 0.3401637  | 1.6237189  | -1.1427943 |
| C  | -1.5879779 | -1.1557252 | -0.6616881 |
| C  | 1.4899311  | 1.1108047  | 0.8190273  |
| C  | -0.2213826 | -1.7406824 | 1.1286573  |
| C  | -0.5211094 | 1.9489904  | -0.0475507 |
| C  | -2.7708928 | -0.7162086 | -1.4623067 |
| C  | 2.5661545  | 0.7157017  | 1.7758559  |
| C  | -1.5107494 | -1.2114381 | 0.7745374  |
| C  | 0.2063311  | 1.6956278  | 1.1916071  |
| C  | 0.2606814  | -2.0014082 | 2.5190395  |
| C  | -1.8777131 | 2.5669962  | -0.1366505 |
| C  | -2.5840645 | -0.8180421 | 1.7368980  |
| C  | -0.2670165 | 1.9053761  | 2.4906338  |
| H  | 1.0400882  | -1.7290757 | -2.8387932 |
| H  | 2.4797916  | 0.2662470  | -2.3748346 |
| H  | 2.4894028  | -2.3490432 | 0.6528369  |
| H  | -1.0306823 | 1.7391773  | -2.7978639 |
| H  | 2.3548871  | -2.3598038 | -1.1170962 |
| H  | 0.5829298  | 1.1337911  | -3.2241828 |
| H  | -0.5757602 | -1.1347181 | -3.2700143 |
| H  | 3.3862629  | -0.0271213 | -0.8767288 |
| H  | -2.4715906 | -0.2616173 | -2.4099478 |

|   |            |            |            |
|---|------------|------------|------------|
| H | 3.1986226  | 1.5838774  | 2.0008893  |
| H | -3.3879403 | -0.0023719 | -0.9122622 |
| H | 3.2104362  | -0.0616940 | 1.3581827  |
| H | 1.3511638  | -2.0380910 | 2.5669775  |
| H | -2.3606836 | 2.3384019  | -1.0890051 |
| H | -0.3146421 | -2.8544003 | -2.9638233 |
| H | 3.3927149  | 1.5757103  | -1.6196136 |
| H | 1.7630545  | -3.7303924 | -0.1730509 |
| H | 0.3395404  | 2.8500570  | -2.8835263 |
| H | -0.0941835 | -1.2361384 | 3.2150854  |
| H | -2.5287468 | 2.2296654  | 0.6739705  |
| H | -3.1727786 | -1.6997826 | 2.0195491  |
| H | 0.3422614  | 1.6643101  | 3.3541831  |
| H | -3.2700396 | -0.0886831 | 1.2999021  |
| H | -1.2510081 | 2.3247528  | 2.6657848  |
| H | -3.3991552 | -1.5844874 | -1.6978313 |
| H | 2.1524041  | 0.3537162  | 2.7199414  |
| H | -0.1200249 | -2.9692361 | 2.8686759  |
| H | -1.7925441 | 3.6584853  | -0.0606838 |
| H | -2.1619783 | -0.3928565 | 2.6516986  |

**Df<sup>-</sup>** Ph<sub>2</sub>CNNHB(C<sub>6</sub>F<sub>5</sub>)<sub>3</sub><sup>-</sup> anion (**1<sup>-</sup>** in text)

60

Energy = -2821.541490934

|   |            |            |            |
|---|------------|------------|------------|
| B | -0.7405543 | 0.1876153  | 0.2928834  |
| C | -0.3391348 | -0.4620495 | 1.7641811  |
| C | -1.3511854 | 1.7174608  | 0.4695166  |
| C | -1.7581060 | -0.8271298 | -0.5552178 |
| C | -1.0979624 | -1.4030164 | 2.4594115  |
| C | 0.8492665  | -0.1070289 | 2.4071432  |
| C | -1.3631969 | 2.6270475  | -0.5949770 |
| C | -1.8609648 | 2.2433422  | 1.6577566  |
| C | -1.4207524 | -2.1704488 | -0.7688621 |
| C | -2.9527251 | -0.4505189 | -1.1708822 |
| C | -0.7023453 | -1.9993534 | 3.6525920  |
| F | -2.3229798 | -1.7807065 | 2.0014245  |
| C | 1.2913921  | -0.6790917 | 3.5973111  |
| F | 1.6436030  | 0.8753656  | 1.9079825  |
| C | -1.7929739 | 3.9455444  | -0.4990555 |
| F | -0.9867363 | 2.2314684  | -1.8413194 |
| C | -2.3077575 | 3.5568023  | 1.8024301  |
| F | -1.9768041 | 1.4784995  | 2.7740752  |
| C | -2.1611620 | -3.0478193 | -1.5554799 |
| F | -0.3473116 | -2.7215928 | -0.1550845 |
| C | -3.7298073 | -1.2949873 | -1.9635664 |
| F | -3.4677180 | 0.8008426  | -1.0154031 |
| C | 0.5114937  | -1.6413178 | 4.2258862  |
| F | -1.4880687 | -2.9134899 | 4.2683639  |
| F | 2.4600050  | -0.2960248 | 4.1611993  |
| C | -2.2682126 | 4.4212234  | 0.7175054  |
| F | -1.7780774 | 4.7609623  | -1.5765213 |
| F | -2.7844145 | 3.9963405  | 2.9880990  |
| C | -3.3278533 | -2.6068073 | -2.1681862 |
| F | -1.7726546 | -4.3345065 | -1.7110302 |
| F | -4.8754715 | -0.8499634 | -2.5312280 |
| F | 0.9162001  | -2.2048817 | 5.3836345  |
| F | -2.6964949 | 5.6932609  | 0.8363181  |
| F | -4.0619411 | -3.4414974 | -2.9333825 |
| N | 0.5504404  | 0.3812672  | -0.5382255 |
| N | 1.4485618  | -0.5797181 | -0.6743673 |
| C | 2.6359472  | -0.3478215 | -1.1834857 |
| C | 3.0629774  | 0.9997073  | -1.6523843 |
| C | 3.5600360  | -1.4864111 | -1.2489209 |
| C | 2.3408068  | 1.6783710  | -2.6481225 |
| C | 4.1758004  | 1.6417359  | -1.0849505 |
| C | 3.2636354  | -2.6964023 | -0.5833140 |
| C | 4.7593139  | -1.4197056 | -1.9853798 |

|   |           |            |            |
|---|-----------|------------|------------|
| C | 2.7180180 | 2.9557006  | -3.0637680 |
| H | 1.4781720 | 1.1960199  | -3.0993428 |
| C | 4.5593761 | 2.9148177  | -1.5038033 |
| H | 4.7386010 | 1.1314072  | -0.3078982 |
| C | 4.1253656 | -3.7830653 | -0.6601731 |
| H | 2.3425399 | -2.7550387 | -0.0132562 |
| C | 5.6236678 | -2.5130211 | -2.0560470 |
| H | 5.0092734 | -0.5048583 | -2.5152407 |
| C | 3.8301670 | 3.5781358  | -2.4943934 |
| H | 2.1436823 | 3.4632202  | -3.8342614 |
| H | 5.4238361 | 3.3944647  | -1.0520280 |
| C | 5.3153590 | -3.7035492 | -1.3961806 |
| H | 3.8745293 | -4.7026549 | -0.1367906 |
| H | 6.5398424 | -2.4338133 | -2.6366915 |
| H | 4.1251183 | 4.5731631  | -2.8164152 |
| H | 5.9881950 | -4.5554614 | -1.4504841 |
| H | 0.8623016 | 1.3249170  | -0.7746774 |

Dh<sup>-</sup> Ph<sub>2</sub>CNNHPh<sub>3</sub><sup>-</sup> (4<sup>-</sup> in text)

60

Energy = -1332.263755700

|   |            |            |            |
|---|------------|------------|------------|
| B | -0.6322974 | 0.1836501  | 0.3574749  |
| C | -0.4098946 | -0.5193636 | 1.8142638  |
| C | -1.2740360 | 1.6800128  | 0.5021312  |
| C | -1.6025865 | -0.7523616 | -0.5760285 |
| C | -1.3833521 | -1.3363664 | 2.4139938  |
| C | 0.7570856  | -0.2884531 | 2.5645198  |
| C | -1.3966729 | 2.5031922  | -0.6344999 |
| C | -1.7338269 | 2.2183276  | 1.7143097  |
| C | -1.0955701 | -1.8292709 | -1.3262184 |
| C | -2.9955347 | -0.5614163 | -0.6193129 |
| C | -1.2128749 | -1.8886111 | 3.6866343  |
| H | -2.2977524 | -1.5525203 | 1.8639574  |
| C | 0.9463685  | -0.8346346 | 3.8354040  |
| H | 1.5410186  | 0.3295167  | 2.1319676  |
| C | -1.9286762 | 3.7915977  | -0.5692842 |
| H | -1.0747345 | 2.1171689  | -1.6018692 |
| C | -2.2821246 | 3.5022555  | 1.7961602  |
| H | -1.6587489 | 1.6138085  | 2.6162181  |
| C | -1.9255115 | -2.6653290 | -2.0764113 |
| H | -0.0234434 | -2.0140049 | -1.3096194 |
| C | -3.8411082 | -1.3949761 | -1.3578747 |
| H | -3.4282518 | 0.2673224  | -0.0607121 |
| C | -0.0422245 | -1.6408596 | 4.4066577  |
| H | -1.9910943 | -2.5181359 | 4.1158889  |
| H | 1.8668473  | -0.6360059 | 4.3820746  |
| C | -2.3778672 | 4.2992095  | 0.6534619  |
| H | -2.0006804 | 4.3991083  | -1.4698629 |
| H | -2.6316869 | 3.8841369  | 2.7540738  |
| C | -3.3078281 | -2.4543894 | -2.0953453 |
| H | -1.4958459 | -3.4870601 | -2.6477254 |
| H | -4.9152362 | -1.2151734 | -1.3632707 |
| H | 0.1004796  | -2.0727756 | 5.3950303  |
| H | -2.7985836 | 5.3005933  | 0.7129302  |
| H | -3.9578259 | -3.1035269 | -2.6783248 |
| N | 0.7492419  | 0.4210664  | -0.3393575 |
| N | 1.6382881  | -0.5275698 | -0.5271143 |
| C | 2.7860661  | -0.3216788 | -1.1485654 |
| C | 3.1678194  | 0.9917612  | -1.7265672 |
| C | 3.7015821  | -1.4625347 | -1.2156279 |
| C | 2.3204191  | 1.6711694  | -2.6212866 |
| C | 4.3791816  | 1.6113087  | -1.3720513 |
| C | 3.4903616  | -2.6091831 | -0.4148065 |
| C | 4.8122970  | -1.4758838 | -2.0858278 |
| C | 2.6684583  | 2.9200707  | -3.1357944 |
| H | 1.3864257  | 1.2053968  | -2.9255283 |
| C | 4.7342163  | 2.8545555  | -1.8928876 |

|   |           |            |            |
|---|-----------|------------|------------|
| H | 5.0467262 | 1.1024387  | -0.6816749 |
| C | 4.3418561 | -3.7046255 | -0.4914369 |
| H | 2.6428400 | -2.6086982 | 0.2634487  |
| C | 5.6678194 | -2.5751082 | -2.1533192 |
| H | 4.9978845 | -0.6166439 | -2.7245545 |
| C | 3.8774566 | 3.5188717  | -2.7746685 |
| H | 1.9962738 | 3.4237553  | -3.8258403 |
| H | 5.6792805 | 3.3093721  | -1.6057131 |
| C | 5.4436229 | -3.7007023 | -1.3578807 |
| H | 4.1549721 | -4.5709747 | 0.1398427  |
| H | 6.5127035 | -2.5521301 | -2.8382066 |
| H | 4.1492870 | 4.4918115  | -3.1756216 |
| H | 6.1131672 | -4.5554046 | -1.4069702 |
| H | 0.9883784 | 1.3559501  | -0.6835274 |

Dh<sup>+</sup> Ph<sub>2</sub>CNNHPh<sub>3</sub><sup>+</sup>

60

Energy = -1332.120768434

|   |            |            |            |
|---|------------|------------|------------|
| B | -0.6134242 | 0.1834973  | 0.4042523  |
| C | -0.3824571 | -0.5803774 | 1.8151465  |
| C | -1.1747396 | 1.7017920  | 0.5468609  |
| C | -1.5783915 | -0.7093914 | -0.5979815 |
| C | -1.3045891 | -1.5092323 | 2.3203721  |
| C | 0.7262849  | -0.274285  | 2.6265690  |
| C | -1.2869463 | 2.5300559  | -0.5854125 |
| C | -1.5799273 | 2.2470518  | 1.7743392  |
| C | -1.1046455 | -1.8649412 | -1.2362505 |
| C | -2.9347818 | -0.3873394 | -0.7568078 |
| C | -1.1401412 | -2.1017125 | 3.5753253  |
| H | -2.1693814 | -1.7759531 | 1.7168334  |
| C | 0.9094543  | -0.8696059 | 3.8760435  |
| H | 1.4628503  | 0.4438610  | 2.2768766  |
| C | -1.7646381 | 3.8386661  | -0.5020599 |
| H | -1.0190679 | 2.1359001  | -1.5662621 |
| C | -2.0734756 | 3.5514206  | 1.8716672  |
| H | -1.5093079 | 1.6352706  | 2.6705469  |
| C | -1.9498823 | -2.6786510 | -1.9930514 |
| H | -0.0587599 | -2.1434913 | -1.1276385 |
| C | -3.7917399 | -1.2025410 | -1.5023998 |
| H | -3.3291395 | 0.5078305  | -0.2829224 |
| C | -0.0272721 | -1.7880002 | 4.3576336  |
| H | -1.8774555 | -2.8135945 | 3.9397698  |
| H | 1.7789166  | -0.6124720 | 4.4771764  |
| C | -2.1635195 | 4.3545819  | 0.7333551  |
| H | -1.8371717 | 4.4511652  | -1.3977408 |
| H | -2.3853715 | 3.9429087  | 2.8375025  |
| C | -3.3009242 | -2.3497537 | -2.1278718 |
| H | -1.5565433 | -3.5704366 | -2.4759016 |
| H | -4.8429134 | -0.9387093 | -1.5969600 |
| H | 0.1097231  | -2.2524755 | 5.3308637  |
| H | -2.5442442 | 5.3701305  | 0.8064853  |
| H | -3.9631603 | -2.9802193 | -2.7158072 |
| N | 0.7541545  | 0.3367732  | -0.3307296 |
| N | 1.6445296  | -0.6029460 | -0.4306992 |
| C | 2.7797404  | -0.3726455 | -1.1159637 |
| C | 3.0607343  | 0.9247206  | -1.7698363 |
| C | 3.7254778  | -1.4692075 | -1.1537162 |
| C | 2.1979080  | 1.4354075  | -2.7562211 |
| C | 4.1719125  | 1.6859395  | -1.3702717 |
| C | 3.5291658  | -2.6142300 | -0.3425447 |
| C | 4.8393879  | -1.4328314 | -2.0229389 |
| C | 2.4443122  | 2.6824889  | -3.3276335 |
| H | 1.3533174  | 0.8402615  | -3.0936937 |
| C | 4.4067124  | 2.9365971  | -1.9366584 |
| H | 4.8383245  | 1.2984483  | -0.6051300 |
| C | 4.4175685  | -3.6762083 | -0.4056939 |
| H | 2.6762312  | -2.6361773 | 0.3268368  |



|   |           |            |            |
|---|-----------|------------|------------|
| C | 5.7226830 | -2.5037320 | -2.0799749 |
| H | 4.9893164 | -0.5707512 | -2.6643187 |
| C | 3.5435141 | 3.4373230  | -2.9140508 |
| H | 1.7789348 | 3.0620761  | -4.0969684 |
| H | 5.2629755 | 3.5214718  | -1.6146628 |
| C | 5.5170865 | -3.6277669 | -1.2735545 |
| H | 4.2618718 | -4.5493164 | 0.2211080  |
| H | 6.5695618 | -2.4706902 | -2.7586407 |
| H | 3.7290543 | 4.4121762  | -3.3546710 |
| H | 6.2083710 | -4.4637513 | -1.3213508 |
| H | 0.9686095 | 1.2288893  | -0.8032418 |

**Ef** Cp\*CoC<sub>5</sub>Me<sub>4</sub>CH<sub>2</sub>B(C<sub>6</sub>F<sub>5</sub>)<sub>3</sub> (2 in text)  
84

Energy = -4372.619077765

|    |            |            |            |
|----|------------|------------|------------|
| Co | 0.0050225  | 0.2265172  | -0.0455656 |
| C  | -1.9454209 | 2.4022141  | 1.2582990  |
| C  | 1.2520849  | 2.9577087  | -1.1515199 |
| C  | -1.7367056 | 1.0707713  | 0.6093927  |
| C  | 1.4238167  | 1.5711296  | -0.6205504 |
| C  | -2.1002869 | 1.7935094  | -1.8771051 |
| C  | 1.6439567  | 2.1525811  | 1.9195963  |
| C  | -1.8044014 | 0.7974269  | -0.8017049 |
| C  | 1.5984668  | 1.2114190  | 0.7594274  |
| C  | -1.4902160 | -0.1719569 | 1.2912709  |
| C  | 1.5145830  | 0.3700461  | -1.4060606 |
| C  | -1.5995372 | -0.6152114 | -0.9911261 |
| C  | 1.8009684  | -0.2113827 | 0.8221638  |
| C  | -1.4105179 | -0.3549306 | 2.7731827  |
| C  | 1.4297334  | 0.3089940  | -2.8956322 |
| C  | -1.4053027 | -1.2141697 | 0.3018313  |
| C  | 1.7716376  | -0.7367909 | -0.5207360 |
| C  | -1.6371062 | -1.3492522 | -2.2932027 |
| C  | 2.0386803  | -0.9901786 | 2.0751496  |
| C  | -1.2048769 | -2.6717620 | 0.5653202  |
| C  | 1.9807152  | -2.1556429 | -0.9028008 |
| H  | -1.6009498 | 3.2197497  | 0.6195572  |
| H  | 0.7106327  | 3.5969531  | -0.4491599 |
| H  | -1.6040385 | 1.5330647  | -2.8155611 |
| H  | 1.2425651  | 1.6947167  | 2.8275947  |
| H  | -1.7896409 | 2.8003250  | -1.5884486 |
| H  | 1.0889278  | 3.0714196  | 1.7171142  |
| H  | -1.4233233 | 2.4675037  | 2.2158169  |
| H  | 0.7209399  | 2.9603985  | -2.1060572 |
| H  | -0.9425990 | 0.5038807  | 3.2622274  |
| H  | 0.7350398  | 1.0550744  | -3.2909957 |
| H  | -0.8487161 | -1.2533530 | 3.0376469  |
| H  | 1.1132272  | -0.6781468 | -3.2348928 |
| H  | -1.4234636 | -0.6866639 | -3.1347411 |
| H  | 1.4765791  | -0.5774458 | 2.9163687  |
| H  | -3.0141120 | 2.5611388  | 1.4512798  |
| H  | 2.2372475  | 3.4114312  | -1.3198598 |
| H  | -3.1799853 | 1.8219003  | -2.0718165 |
| H  | 2.6855600  | 2.4318277  | 2.1251707  |
| H  | -0.9193263 | -2.1739932 | -2.3098608 |
| H  | 1.7662146  | -2.0407846 | 1.9518528  |
| H  | -0.6589580 | -2.8403994 | 1.4967834  |
| H  | 1.2984971  | -2.4196585 | -1.7113187 |
| H  | -0.6559788 | -3.1539797 | -0.2465815 |
| H  | 1.7140673  | -2.7814719 | -0.0456997 |
| H  | -2.4206120 | -0.4604926 | 3.1891221  |
| H  | 2.4170801  | 0.5112302  | -3.3274231 |
| H  | -2.6352417 | -1.7772112 | -2.4504153 |
| H  | 3.1012782  | -0.9532925 | 2.3409205  |
| H  | -2.1783622 | -3.1707313 | 0.6543035  |
| C  | 4.4883422  | -1.9647992 | -0.1213993 |
| C  | 4.9069054  | -2.6725740 | 1.0075010  |

|   |           |            |            |
|---|-----------|------------|------------|
| C | 4.7904746 | -0.5995602 | -0.0645593 |
| C | 5.5992810 | -2.1059709 | 2.0773872  |
| C | 5.4646131 | 0.0157843  | 0.9843869  |
| C | 5.8822002 | -0.7459678 | 2.0701560  |
| C | 3.9797786 | -2.1098390 | -2.8516577 |
| C | 3.1358220 | -2.3835693 | -3.9345796 |
| C | 5.1999552 | -1.5432003 | -3.2384046 |
| C | 3.4113995 | -2.0638009 | -5.2596676 |
| C | 5.5234697 | -1.2039542 | -4.5516614 |
| C | 4.6198747 | -1.4554047 | -5.5756133 |
| C | 3.6805690 | -4.2478947 | -1.4390709 |
| C | 4.9443497 | -4.8150372 | -1.6377782 |
| C | 2.6436172 | -5.1816931 | -1.4649024 |
| C | 5.1840507 | -6.1695397 | -1.8317922 |
| C | 2.8308296 | -6.5506073 | -1.6596024 |
| C | 4.1106707 | -7.0539867 | -1.8446930 |
| B | 3.5472118 | -2.5962159 | -1.3220279 |
| F | 6.0427745 | -4.0160518 | -1.6335260 |
| F | 6.4395360 | -6.6370073 | -2.0035101 |
| F | 4.3100848 | -8.3725374 | -2.0345079 |
| F | 1.7738051 | -7.3930676 | -1.6733978 |
| F | 1.3432609 | -4.8108115 | -1.2980059 |
| F | 1.9466269 | -3.0209143 | -3.7362504 |
| F | 2.5223654 | -2.3418674 | -6.2382457 |
| F | 4.9155386 | -1.1339664 | -6.8492739 |
| F | 6.7175324 | -0.6432147 | -4.8415630 |
| F | 6.1841649 | -1.3009989 | -2.3382869 |
| F | 4.4181079 | 0.2279247  | -1.0757818 |
| F | 5.7102433 | 1.3445227  | 0.9651092  |
| F | 6.5352189 | -0.1731957 | 3.0994387  |
| F | 5.9779628 | -2.8608931 | 3.1312059  |
| F | 4.6290472 | -3.9961683 | 1.1456654  |

**Fc** Cp<sub>2</sub>Fe with Cp = C<sub>5</sub>H<sub>5</sub> (singlet)

21

Energy = -1651.175682763

|    |            |            |            |
|----|------------|------------|------------|
| Fe | -0.0001158 | -0.0009877 | -0.0000167 |
| C  | -0.0004729 | 1.2195061  | 1.6288779  |
| C  | 0.0012303  | 1.2194391  | -1.6289953 |
| C  | 0.7160966  | -0.9863575 | 1.6312076  |
| C  | -0.7167423 | -0.9859705 | -1.6313307 |
| C  | 0.7166383  | -0.9868063 | -1.6306581 |
| C  | -0.7172799 | -0.9862841 | 1.6308529  |
| C  | 1.1603767  | 0.3761777  | -1.6292575 |
| C  | -1.1601647 | 0.3769824  | 1.6294340  |
| C  | 1.1591248  | 0.3768564  | 1.6300183  |
| C  | -1.1589056 | 0.3775314  | -1.6302569 |
| H  | -0.0004184 | 2.3011206  | 1.6008622  |
| H  | 0.0018732  | 2.3010641  | -1.6009335 |
| H  | 1.3518875  | -1.8614922 | 1.6063216  |
| H  | -1.3530782 | -1.8606984 | -1.6065264 |
| H  | 1.3519375  | -1.8622784 | -1.6051446 |
| H  | -1.3531305 | -1.8613592 | 1.6056688  |
| H  | 2.1893048  | 0.7097597  | -1.6020806 |
| H  | -2.1888645 | 0.7112222  | 1.6024255  |
| H  | 2.1878936  | 0.7109857  | 1.6034713  |
| H  | -2.1874673 | 0.7123316  | -1.6040783 |

**Fc<sup>++</sup>** Cp<sub>2</sub>Fe<sup>++</sup> (doublet)

21

Energy = -1650.986708241

|    |            |            |            |
|----|------------|------------|------------|
| Fe | -0.0000011 | 0.0000009  | -0.1099526 |
| C  | -0.0000099 | -1.7636857 | -1.3153289 |
| C  | 0.0000101  | 1.7636863  | -1.3153302 |
| C  | 0.7180561  | -1.6498600 | 0.8783424  |
| C  | -0.7180560 | 1.6498739  | 0.8783412  |
| C  | 0.7180792  | 1.6498710  | 0.8783385  |

|   |            |            |            |
|---|------------|------------|------------|
| C | -0.7180797 | -1.6498800 | 0.8783407  |
| C | 1.1535123  | 1.7182867  | -0.4835042 |
| C | -1.1535088 | -1.7183096 | -0.4835006 |
| C | 1.1534765  | -1.7183119 | -0.4834914 |
| C | -1.1534736 | 1.7183369  | -0.4834906 |
| H | 0.0000403  | -1.7663672 | -2.3972284 |
| H | -0.0000431 | 1.7663672  | -2.3972298 |
| H | 1.3568245  | -1.5994027 | 1.7491487  |
| H | -1.3568243 | 1.5994087  | 1.7491496  |
| H | 1.3568901  | 1.5993454  | 1.7491215  |
| H | -1.3568978 | -1.5993610 | 1.7491178  |
| H | 2.1796895  | 1.6988504  | -0.8247268 |
| H | -2.1796865 | -1.6988884 | -0.8247236 |
| H | 2.1796824  | -1.6989257 | -0.8246200 |
| H | -2.1796801 | 1.6989647  | -0.8246183 |

**Fs** Cp\*<sub>2</sub>Fe (singlet)

51

Energy = -2044.601100297

|    |            |            |            |
|----|------------|------------|------------|
| Fe | 0.0000076  | -0.0000026 | 0.0149362  |
| C  | -0.1721470 | -1.7793641 | -2.6514301 |
| C  | 2.8473026  | 0.6324474  | -1.3246263 |
| C  | -0.4209841 | -1.6021585 | -1.1846509 |
| C  | 1.6246918  | 1.0864436  | -0.5872386 |
| C  | 1.8151108  | -2.6295418 | -0.2927769 |
| C  | 0.1723868  | 1.7798678  | -2.6510717 |
| C  | 0.4730803  | -1.9850611 | -0.1237040 |
| C  | 0.4210978  | 1.6023835  | -1.1843042 |
| C  | -1.6246266 | -1.0863167 | -0.5876008 |
| C  | 1.4744790  | 1.1502042  | 0.8427740  |
| C  | -0.1781533 | -1.7059386 | 1.1290425  |
| C  | -0.4730747 | 1.9850680  | -0.1233693 |
| C  | -2.8471565 | -0.6321709 | -1.3250303 |
| C  | 2.5140751  | 0.7748678  | 1.8542878  |
| C  | -1.4745531 | -1.1503528 | 0.8424145  |
| C  | 0.1780476  | 1.7057184  | 1.1293834  |
| C  | 0.3665506  | -2.0096830 | 2.4913125  |
| C  | -1.8150995 | 2.6295641  | -0.2924356 |
| C  | -2.5142517 | -0.7751936 | 1.8538893  |
| C  | -0.3667780 | 2.0092157  | 2.4916585  |
| H  | 0.8882059  | -1.6607732 | -2.8955455 |
| H  | 2.5890163  | 0.1648535  | -2.2798823 |
| H  | 2.5003224  | -2.3461554 | 0.5123392  |
| H  | -0.8879242 | 1.6611794  | -2.8953225 |
| H  | 2.2772630  | -2.3460142 | -1.2425051 |
| H  | 0.7366865  | 1.0533027  | -3.2424468 |
| H  | -0.7362858 | -1.0525963 | -3.2427091 |
| H  | 3.4198905  | -0.0927318 | -0.7395637 |
| H  | -2.5887558 | -0.1642348 | -2.2800884 |
| H  | 3.1890835  | 1.6187450  | 2.0557191  |
| H  | -3.4198968 | 0.0927652  | -0.7398153 |
| H  | 3.1289251  | -0.0611023 | 1.5063552  |
| H  | 1.4601613  | -1.9992331 | 2.4953680  |
| H  | -2.2771009 | 2.3463105  | -1.2423181 |
| H  | -0.4763061 | -2.7822286 | -2.9830407 |
| H  | 3.5123855  | 1.4801952  | -1.5421229 |
| H  | 1.7289174  | -3.7253031 | -0.2814641 |
| H  | 0.4764398  | 2.7828439  | -2.9824400 |
| H  | 0.0208704  | -1.2826397 | 3.2328547  |
| H  | -2.5004273 | 2.3459059  | 0.5124851  |
| H  | -3.1894538 | -1.6190185 | 2.0548916  |
| H  | -0.0211636 | 1.2820145  | 3.2330785  |
| H  | -3.1288897 | 0.0610206  | 1.5061658  |
| H  | -1.4603879 | 1.9987913  | 2.4956301  |
| H  | -3.5121368 | -1.4798989 | -1.5429203 |
| H  | 2.0588994  | 0.4840083  | 2.8053272  |
| H  | 0.0443474  | -3.0044388 | 2.8302768  |

|   |            |            |            |
|---|------------|------------|------------|
| H | -1.7289321 | 3.7253236  | -0.2807519 |
| H | -2.0591792 | -0.4847776 | 2.8051134  |
| H | -0.0445795 | 3.0038893  | 2.8308621  |

**Fs**<sup>++</sup> Cp\*<sub>2</sub>Fe<sup>++</sup> (doublet)

51

Energy = -2044.435375424

|    |            |            |            |
|----|------------|------------|------------|
| Fe | 0.0000201  | -0.0000087 | 0.0102361  |
| C  | 0.5722914  | 1.7906370  | -2.6461279 |
| C  | -2.8924774 | 0.0193179  | -1.4029148 |
| C  | 0.8092817  | 1.5461261  | -1.1894780 |
| C  | -1.8396242 | -0.7140891 | -0.6317453 |
| C  | -1.0861868 | 3.0654568  | -0.2426909 |
| C  | -0.5723700 | -1.7907058 | -2.6461768 |
| C  | 0.0668857  | 2.1226472  | -0.1098266 |
| C  | -0.8093519 | -1.5461993 | -1.1895281 |
| C  | 1.8395740  | 0.7140022  | -0.6316894 |
| C  | -1.7310500 | -0.7784870 | 0.8059241  |
| C  | 0.6284931  | 1.6518396  | 1.1232204  |
| C  | -0.0668426 | -2.1225948 | -0.1098960 |
| C  | 2.8924493  | -0.0193828 | -1.4028533 |
| C  | -2.6649697 | -0.1443116 | 1.7891897  |
| C  | 1.7310580  | 0.7785203  | 0.8059884  |
| C  | -0.6284077 | -1.6517283 | 1.1231761  |
| C  | 0.1942146  | 2.0521498  | 2.4979302  |
| C  | 1.0862325  | -3.0654018 | -0.2427694 |
| C  | 2.6649680  | 0.1443576  | 1.7892694  |
| C  | -0.1941561 | -2.0521211 | 2.4978794  |
| H  | -0.4860465 | 1.9605089  | -2.8606744 |
| H  | -2.5179962 | 0.3633318  | -2.3706212 |
| H  | -1.7991009 | 2.9498391  | 0.5778059  |
| H  | 0.4859779  | -1.9604913 | -2.8607430 |
| H  | -1.6146226 | 2.9249616  | -1.1883479 |
| H  | -0.9228084 | -0.9550082 | -3.2560740 |
| H  | 0.9226395  | 0.9548980  | -3.2560203 |
| H  | -3.2663612 | 0.8833456  | -0.8488031 |
| H  | 2.5179846  | -0.3633873 | -2.3705691 |
| H  | -3.5184280 | -0.8081695 | 1.9751104  |
| H  | 3.2663299  | -0.8834183 | -0.8487505 |
| H  | -3.0604171 | 0.8036696  | 1.4154023  |
| H  | -0.8638651 | 2.3230822  | 2.5231151  |
| H  | 1.6146184  | -2.9249484 | -1.1884611 |
| H  | 1.1204734  | 2.6861055  | -2.9650340 |
| H  | -3.7441776 | -0.6449258 | -1.5956103 |
| H  | -0.7214423 | 4.1001455  | -0.2176809 |
| H  | -1.1204803 | -2.6862282 | -2.9650556 |
| H  | 0.3665836  | 1.2533058  | 3.2237404  |
| H  | 1.7991949  | -2.9497295 | 0.5776773  |
| H  | 3.5184712  | 0.8081797  | 1.9751135  |
| H  | -0.3668881 | -1.2534423 | 3.2237850  |
| H  | 3.0603512  | -0.8036723 | 1.4155377  |
| H  | 0.8640079  | -2.3227073 | 2.5231690  |
| H  | 3.7441488  | 0.6448686  | -1.5955254 |
| H  | -2.1743084 | 0.0394924  | 2.7478282  |
| H  | 0.7682973  | 2.9270082  | 2.8282393  |
| H  | 0.7215105  | -4.1000978 | -0.2176888 |
| H  | 2.1743239  | -0.0393401 | 2.7479374  |
| H  | -0.7680023 | -2.9271997 | 2.8279998  |

**Rco**<sup>'</sup> Cp\*<sub>2</sub>Co<sup>'</sup> (doublet)

51

Energy = -2163.629450756

|    |            |            |            |
|----|------------|------------|------------|
| Co | 0.0000019  | -0.0000032 | 0.0133037  |
| C  | -0.1272345 | -1.9013442 | -2.6411480 |
| C  | 2.8215841  | 0.6852846  | -1.3892988 |
| C  | -0.4301256 | -1.7046733 | -1.1867471 |
| C  | 1.6145902  | 1.1457929  | -0.6295598 |

|   |            |            |            |
|---|------------|------------|------------|
| C | 1.8044191  | -2.6409769 | -0.2042511 |
| C | 0.1278118  | 1.9023230  | -2.6407262 |
| C | 0.4497362  | -2.0102529 | -0.0862327 |
| C | 0.4300625  | 1.7054353  | -1.1862219 |
| C | -1.6149676 | -1.1463270 | -0.6304130 |
| C | 1.5119959  | 1.2018874  | 0.8235079  |
| C | -0.2555183 | -1.7726609 | 1.1548068  |
| C | -0.4496961 | 2.0104257  | -0.0861119 |
| C | -2.8220784 | -0.6858064 | -1.3899430 |
| C | 2.5907615  | 0.7970815  | 1.7818637  |
| C | -1.5115894 | -1.2013716 | 0.8227125  |
| C | 0.2554580  | 1.7717253  | 1.1552832  |
| C | 0.2656017  | -2.0608477 | 2.5299921  |
| C | -1.8043838 | 2.6412241  | -0.2036334 |
| C | -2.5903198 | -0.7966205 | 1.7811408  |
| C | -0.2661751 | 2.0596871  | 2.5303206  |
| H | 0.9359197  | -1.7463616 | -2.8521927 |
| H | 2.5517141  | 0.3160841  | -2.3834393 |
| H | 2.4637337  | -2.3317284 | 0.6126850  |
| H | -0.9356594 | 1.7496225  | -2.8518522 |
| H | 2.2870768  | -2.3756915 | -1.1490348 |
| H | 0.6950115  | 1.2027633  | -3.2622321 |
| H | -0.6959472 | -1.2032840 | -3.2629464 |
| H | 3.3435284  | -0.1174006 | -0.8605131 |
| H | -2.5524404 | -0.3174449 | -2.3844614 |
| H | 3.3242291  | 1.6046028  | 1.9173254  |
| H | -3.3433268 | 0.1176026  | -0.8615572 |
| H | 3.1375409  | -0.0801205 | 1.4216220  |
| H | 1.3548080  | -1.9642475 | 2.5707011  |
| H | -2.2870081 | 2.3766997  | -1.1486540 |
| H | -0.3804162 | -2.9189817 | -2.9721295 |
| H | 3.5381221  | 1.5076691  | -1.5248963 |
| H | 1.7288489  | -3.7367540 | -0.1679131 |
| H | 0.3833607  | 2.9192449  | -2.9720976 |
| H | -0.1589558 | -1.3744855 | 3.2695685  |
| H | -2.4637067 | 2.3312510  | 0.6130179  |
| H | -3.3232295 | -1.6045509 | 1.9171172  |
| H | 0.1594830  | 1.3743557  | 3.2702043  |
| H | -3.1376933 | 0.0800673  | 1.4205742  |
| H | -1.3552243 | 1.9614550  | 2.5710634  |
| H | -3.5392173 | -1.5078247 | -1.5246183 |
| H | 2.1786250  | 0.5564933  | 2.7662493  |
| H | 0.0163549  | -3.0834804 | 2.8479937  |
| H | -1.7288786 | 3.7369750  | -0.1663233 |
| H | -2.1780881 | -0.5553766 | 2.7653218  |
| H | -0.0184993 | 3.0828640  | 2.8477632  |

**Rco<sup>+</sup>** Cp\*<sub>2</sub>Co<sup>+</sup> (singlet)

51

Energy = -2163.528475998

|    |            |            |            |
|----|------------|------------|------------|
| Co | 0.0000034  | 0.0000041  | -0.0002448 |
| C  | 0.5480265  | 1.7181956  | -2.6495343 |
| C  | -2.8847516 | 0.0641667  | -1.3962185 |
| C  | 0.7774962  | 1.4688595  | -1.1939625 |
| C  | -1.8298655 | -0.6656707 | -0.6293177 |
| C  | -1.1215135 | 2.9918399  | -0.2419481 |
| C  | -0.5480344 | -1.7182001 | -2.6495118 |
| C  | 0.0254538  | 2.0429641  | -0.1093815 |
| C  | -0.7774997 | -1.4688613 | -1.1939387 |
| C  | 1.8298671  | 0.6656737  | -0.6293421 |
| C  | -1.7281742 | -0.7433041 | 0.8042129  |
| C  | 0.6131498  | 1.5946307  | 1.1254804  |
| C  | -0.0254455 | -2.0429515 | -0.1093576 |
| C  | 2.8847546  | -0.0641628 | -1.3962409 |
| C  | -2.6590269 | -0.1081788 | 1.7857634  |
| C  | 1.7281805  | 0.7433163  | 0.8041881  |
| C  | -0.6131394 | -1.5946113 | 1.1255061  |

|   |            |            |            |
|---|------------|------------|------------|
| C | 0.1840709  | 1.9972254  | 2.4992591  |
| C | 1.1215275  | -2.9918224 | -0.2419288 |
| C | 2.6590336  | 0.1082000  | 1.7857437  |
| C | -0.1840845 | -1.9972755 | 2.4992761  |
| H | -0.5108167 | 1.8725268  | -2.8722116 |
| H | -2.5108644 | 0.4233057  | -2.3583630 |
| H | -1.8344916 | 2.8831639  | 0.5793108  |
| H | 0.5108153  | -1.8724668 | -2.8722035 |
| H | -1.6530556 | 2.8524097  | -1.1858098 |
| H | -0.9168032 | -0.8933078 | -3.2630209 |
| H | 0.9167379  | 0.8932779  | -3.2630435 |
| H | -3.2760302 | 0.9152176  | -0.8345408 |
| H | 2.5108902  | -0.4232415 | -2.3584166 |
| H | -3.5123044 | -0.7737640 | 1.9673644  |
| H | 3.2759883  | -0.9152527 | -0.8345910 |
| H | -3.0558720 | 0.8394840  | 1.4129847  |
| H | -0.8757226 | 2.2595311  | 2.5302406  |
| H | 1.6530483  | -2.8524008 | -1.1858021 |
| H | 1.0844315  | 2.6248557  | -2.9567831 |
| H | -3.7247579 | -0.6115961 | -1.6008293 |
| H | -0.7498106 | 4.0240954  | -0.2205677 |
| H | -1.0843900 | -2.6248936 | -2.9567474 |
| H | 0.3692531  | 1.2057395  | 3.2299315  |
| H | 1.8345263  | -2.8831285 | 0.5793103  |
| H | 3.5123197  | 0.7737794  | 1.9673257  |
| H | -0.3695714 | -1.2059297 | 3.2300256  |
| H | 3.0558684  | -0.8394753 | 1.4129839  |
| H | 0.8757746  | -2.2592991 | 2.5303542  |
| H | 3.7247886  | 0.6115849  | -1.6007883 |
| H | -2.1712150 | 0.0718957  | 2.7461584  |
| H | 0.7529054  | 2.8795317  | 2.8188301  |
| H | 0.7498468  | -4.0240844 | -0.2205116 |
| H | 2.1712231  | -0.0718430 | 2.7461454  |
| H | -0.7527406 | -2.8797529 | 2.8186810  |

**Rcr** Cp\*<sub>2</sub>Cr (triplet)

51

Energy = -1825.308773808

|    |            |            |            |
|----|------------|------------|------------|
| Cr | 0.0109040  | -0.0002171 | 0.0361800  |
| C  | -1.8143082 | 1.9236902  | -1.8966629 |
| C  | 1.8216219  | 0.3795208  | -2.6465642 |
| C  | -1.7641000 | 0.8584780  | -0.8405794 |
| C  | 1.7587533  | 0.1777586  | -1.1604029 |
| C  | -1.8500028 | -1.2266840 | -2.4051837 |
| C  | 1.8602549  | 2.6849041  | -0.4198786 |
| C  | -1.8120895 | -0.5551834 | -1.0642410 |
| C  | 1.8171239  | 1.2082256  | -0.1572943 |
| C  | -1.7126605 | 1.0859635  | 0.5852324  |
| C  | 1.7342255  | -1.1010541 | -0.4784837 |
| C  | -1.7867137 | -1.2152610 | 0.2031218  |
| C  | 1.8280411  | 0.5836466  | 1.1274611  |
| C  | -1.7811528 | 2.4196318  | 1.2713765  |
| C  | 1.8091242  | -2.4516395 | -1.1297433 |
| C  | -1.7257126 | -0.2106562 | 1.2340812  |
| C  | 1.7737457  | -0.8363125 | 0.9421891  |
| C  | -1.8269736 | -2.6977948 | 0.4312992  |
| C  | 1.8656732  | 1.2937001  | 2.4484722  |
| C  | -1.7894584 | -0.4528945 | 2.7142101  |
| C  | 1.8131318  | -1.8737180 | 2.0258659  |
| H  | -1.3907299 | 1.5693512  | -2.8413495 |
| H  | 1.3907712  | 1.3429641  | -2.9363087 |
| H  | -1.3825261 | -2.2153639 | -2.3704473 |
| H  | 1.3808932  | 3.2492449  | 0.3859616  |
| H  | -1.3292018 | -0.6331388 | -3.1629168 |
| H  | 1.3512061  | 2.9370137  | -1.3552430 |
| H  | -1.2553900 | 2.8139170  | -1.5916122 |
| H  | 1.2723728  | -0.4047493 | -3.1769725 |

|   |            |            |            |
|---|------------|------------|------------|
| H | -1.3342804 | 3.2064111  | 0.6553319  |
| H | 1.3165754  | -2.4503265 | -2.1072682 |
| H | -1.2504869 | 2.4040917  | 2.2285781  |
| H | 1.3265018  | -3.2178863 | -0.5149040 |
| H | -1.4172589 | -3.2454429 | -0.4225724 |
| H | 1.4043505  | 2.2836840  | 2.3832821  |
| H | -2.8486088 | 2.2384960  | -2.0952707 |
| H | 2.8585387  | 0.3577536  | -3.0120011 |
| H | -2.8848417 | -1.3626224 | -2.7480390 |
| H | 2.8960834  | 3.0422070  | -0.5031263 |
| H | -1.2514207 | -2.9795147 | 1.3187608  |
| H | 1.3397302  | 0.7261992  | 3.2225431  |
| H | -1.2594255 | 0.3289166  | 3.2674226  |
| H | 1.2696428  | -2.7768967 | 1.7311506  |
| H | -1.3396683 | -1.4142625 | 2.9811283  |
| H | 1.3651668  | -1.5011553 | 2.9521557  |
| H | -2.8208074 | 2.7138379  | 1.4770165  |
| H | 2.8516876  | -2.7647452 | -1.2877826 |
| H | -2.8574582 | -3.0472429 | 0.5850548  |
| H | 2.9005974  | 1.4339007  | 2.7896673  |
| H | -2.8282705 | -0.4628783 | 3.0753751  |
| H | 2.8459311  | -2.1730451 | 2.2546573  |

**Rcr<sup>+</sup>** Cp\*<sub>2</sub>Cr<sup>+</sup> (quartet)

51

Energy = -1825.180947584

|    |            |            |            |
|----|------------|------------|------------|
| Cr | -0.0002648 | 0.0533939  | -0.0213084 |
| C  | -1.8309508 | 2.2069230  | 1.6815834  |
| C  | 1.8695295  | 2.7336049  | -0.4731502 |
| C  | -1.8168414 | 1.0255473  | 0.7587775  |
| C  | 1.8341704  | 1.2530683  | -0.2397074 |
| C  | -1.8811928 | 2.3151631  | -1.5155379 |
| C  | 1.9080239  | 1.2803800  | 2.3740572  |
| C  | -1.8399126 | 1.0741050  | -0.6755319 |
| C  | 1.8511520  | 0.6011544  | 1.0388695  |
| C  | -1.8168697 | -0.3538303 | 1.1560790  |
| C  | 1.8153762  | 0.2383046  | -1.2544850 |
| C  | -1.8540774 | -0.2753046 | -1.1645404 |
| C  | 1.8432463  | -0.8165812 | 0.8143495  |
| C  | -1.8302579 | -0.8619117 | 2.5665085  |
| C  | 1.8286975  | 0.4711748  | -2.7354552 |
| C  | -1.8397328 | -1.1578041 | -0.0326133 |
| C  | 1.8210348  | -1.0407846 | -0.6031132 |
| C  | -1.9139947 | -0.6907139 | -2.6038197 |
| C  | 1.8893836  | -1.8753940 | 1.8747318  |
| C  | -1.8811135 | -2.6556361 | -0.0844199 |
| C  | 1.8401647  | -2.3748682 | -1.2867288 |
| H  | -1.3530028 | 3.0791340  | 1.2275618  |
| H  | 1.3787881  | 3.2814423  | 0.3358300  |
| H  | -1.3951136 | 2.1636568  | -2.4832250 |
| H  | 1.4167341  | 0.6869291  | 3.1500293  |
| H  | -1.3978583 | 3.1574409  | -1.0139731 |
| H  | 1.4393298  | 2.2673023  | 2.3443732  |
| H  | -1.3251365 | 1.9872381  | 2.6253858  |
| H  | 1.3878074  | 3.0044653  | -1.4161218 |
| H  | -1.2997685 | -0.1868379 | 3.2437172  |
| H  | 1.3466819  | 1.4162761  | -2.9996856 |
| H  | -1.3773100 | -1.8537161 | 2.6419786  |
| H  | 1.3265944  | -0.3359857 | -3.2749266 |
| H  | -1.4461958 | 0.0503199  | -3.2571296 |
| H  | 1.4080376  | -1.5425465 | 2.7980253  |
| H  | -2.8652450 | 2.4848742  | 1.9192307  |
| H  | 2.9090116  | 3.0808748  | -0.5220749 |
| H  | -2.9219634 | 2.6011472  | -1.7116108 |
| H  | 2.9523510  | 1.4203049  | 2.6794973  |
| H  | -1.4234129 | -1.6543088 | -2.7663224 |
| H  | 1.4041859  | -2.7979622 | 1.5448859  |

|   |            |            |            |
|---|------------|------------|------------|
| H | -1.3945316 | -3.1027578 | 0.7864750  |
| H | 1.3091776  | -2.3463715 | -2.2421873 |
| H | -1.3983724 | -3.0415025 | -0.9860820 |
| H | 1.3908793  | -3.1529881 | -0.6644717 |
| H | -2.8634295 | -0.9425736 | 2.9263640  |
| H | 2.8629341  | 0.5165350  | -3.0985700 |
| H | -2.9589656 | -0.7964167 | -2.9205558 |
| H | 2.9313208  | -2.1194388 | 2.1161350  |
| H | -2.9219695 | -3.0020656 | -0.0943900 |
| H | 2.8745925  | -2.6750337 | -1.4948530 |

**Rf<sup>+</sup>** B(C<sub>6</sub>F<sub>5</sub>)<sub>3</sub><sup>+</sup>

34

Energy = -2209.632469086

|   |            |            |            |
|---|------------|------------|------------|
| B | 0.0012033  | -0.0109023 | -0.0014887 |
| C | 0.0008166  | 1.5556515  | -0.0005609 |
| C | 1.3574151  | -0.7956919 | 0.0057122  |
| C | -1.3549682 | -0.7958387 | -0.0081460 |
| C | -0.9727283 | 2.3283194  | 0.6612238  |
| C | 0.9736905  | 2.3297199  | -0.6617090 |
| C | 2.5021306  | -0.3560458 | 0.6968789  |
| C | 1.5486165  | -2.0111401 | -0.6780352 |
| C | -1.5461370 | -2.0111004 | 0.6759469  |
| C | -2.5005237 | -0.3550835 | -0.6972464 |
| C | -0.9933812 | 3.7157595  | 0.6710392  |
| C | 0.9920768  | 3.7171961  | -0.6717822 |
| C | 3.7111279  | -1.0369712 | 0.7153314  |
| C | 2.7396722  | -2.7233016 | -0.6845275 |
| C | -2.7378989 | -2.7220838 | 0.6845456  |
| C | -3.7102477 | -1.0347595 | -0.7134813 |
| C | -0.0012742 | 4.4260241  | -0.0005116 |
| C | 3.8391085  | -2.2356093 | 0.0177173  |
| C | -3.8379891 | -2.2335268 | -0.0160654 |
| F | -1.9483274 | 1.7140932  | 1.3823473  |
| F | 1.9511388  | 1.7169096  | -1.3815073 |
| F | 2.4487964  | 0.7829520  | 1.4377346  |
| F | 0.5390722  | -2.5325226 | -1.4251964 |
| F | -0.5361795 | -2.5330099 | 1.4221655  |
| F | -2.4476543 | 0.7843792  | -1.4374258 |
| F | -1.9531120 | 4.3915308  | 1.3464623  |
| F | 1.9506581  | 4.3944137  | -1.3473924 |
| F | 4.7640920  | -0.5649930 | 1.4241788  |
| F | 2.8563253  | -3.8761755 | -1.3854885 |
| F | -2.8547457 | -3.8742396 | 1.3866236  |
| F | -4.7644142 | -0.5611151 | -1.4194283 |
| F | -0.0024448 | 5.7773108  | -0.0007637 |
| F | 5.0085016  | -2.9125388 | 0.0222082  |
| F | -5.0078157 | -2.9097055 | -0.0190789 |

**Rf** B(C<sub>6</sub>F<sub>5</sub>)<sub>3</sub>

34

Energy = -2209.515903711

|   |            |            |            |
|---|------------|------------|------------|
| B | -0.0048640 | 0.0003719  | 0.0001165  |
| C | 0.7789229  | 1.3532379  | -0.0020124 |
| C | 0.7789482  | -1.3525317 | 0.0021270  |
| C | -1.5672766 | 0.0002564  | 0.0001365  |
| C | 0.3578124  | 2.4682525  | 0.7383232  |
| C | 1.9538299  | 1.5349954  | -0.7472212 |
| C | 1.9538023  | -1.5345280 | 0.7473674  |
| C | 0.3576413  | -2.4675363 | -0.7382159 |
| C | -2.3182270 | -0.9428809 | 0.7192528  |
| C | -2.3182682 | 0.9432280  | -0.7191447 |
| C | 1.0480835  | 3.6729219  | 0.7560863  |
| C | 2.6565140  | 2.7326004  | -0.7761789 |
| C | 2.6562282  | -2.7322802 | 0.7763149  |
| C | 1.0475713  | -3.6724315 | -0.7558612 |
| C | -3.7066190 | -0.9516225 | 0.7407790  |

|   |            |            |            |
|---|------------|------------|------------|
| C | -3.7066565 | 0.9517836  | -0.7408482 |
| C | 2.2019773  | 3.8070888  | -0.0137989 |
| C | 2.2015057  | -3.8067939 | 0.0140194  |
| C | -4.4051322 | 0.0000490  | -0.0000635 |
| F | -0.7473587 | 2.3900302  | 1.5089166  |
| F | 2.4300703  | 0.5310749  | -1.5131689 |
| F | 2.4303773  | -0.5306497 | 1.5131408  |
| F | -0.7475477 | -2.3891138 | -1.5088482 |
| F | -1.6946191 | -1.8783563 | 1.4653526  |
| F | -1.6946813 | 1.8786397  | -1.4653387 |
| F | 0.6181848  | 4.7045402  | 1.4992386  |
| F | 3.7614981  | 2.8678091  | -1.5261969 |
| F | 3.7613171  | -2.8676634 | 1.5261525  |
| F | 0.6173824  | -4.7037750 | -1.4992184 |
| F | -4.3799580 | -1.8611150 | 1.4624410  |
| F | -4.3800051 | 1.8611354  | -1.4626804 |
| F | 2.8710400  | 4.9636148  | -0.0208090 |
| F | 2.8702687  | -4.9635451 | 0.0213702  |
| F | -5.7410307 | -0.0000288 | -0.0001288 |

**Rh<sup>-</sup> BPh<sub>3</sub><sup>-</sup>**

34

Energy = -720.3448410792

|   |            |            |            |
|---|------------|------------|------------|
| B | 0.0020553  | -0.0136715 | 0.0001346  |
| C | 0.0008924  | 1.5533619  | 0.0007692  |
| C | 1.3587474  | -0.7971243 | 0.0085525  |
| C | -1.3555386 | -0.7967208 | -0.0093016 |
| C | -1.0654689 | 2.3183597  | 0.5499975  |
| C | 1.0655721  | 2.3211926  | -0.5477352 |
| C | 2.5512726  | -0.2588385 | 0.5675096  |
| C | 1.4937699  | -2.1021104 | -0.5420294 |
| C | -1.4927855 | -2.1001764 | 0.5439121  |
| C | -2.5461512 | -0.2587373 | -0.5722507 |
| C | -1.0712745 | 3.7106981  | 0.5550679  |
| C | 1.0676506  | 3.7135365  | -0.5528962 |
| C | 3.7585833  | -0.9522834 | 0.5814097  |
| C | 2.6972299  | -2.8023063 | -0.5383226 |
| C | -2.6973130 | -2.7987057 | 0.5407614  |
| C | -3.7545571 | -0.9503457 | -0.5855218 |
| C | -0.0028087 | 4.4295380  | 0.0010279  |
| C | 3.8489269  | -2.2366163 | 0.0265979  |
| C | -3.8475708 | -2.2325676 | -0.0263894 |
| H | -1.9043305 | 1.7913277  | 0.9999819  |
| H | 1.9056662  | 1.7965473  | -0.9982571 |
| H | 2.5129067  | 0.7308640  | 0.10180290 |
| H | 0.6223841  | -2.5647252 | -1.0009318 |
| H | -0.6224166 | -2.5630483 | 1.0045280  |
| H | -2.5050744 | 0.7288298  | -1.0271942 |
| H | -1.9099677 | 4.2449114  | 0.9992816  |
| H | 1.9048114  | 4.2499776  | -0.9973097 |
| H | 4.6379127  | -0.4951068 | 1.0329571  |
| H | 2.7450341  | -3.7948371 | -0.9840769 |
| H | -2.7470061 | -3.7901023 | 0.9888083  |
| H | -4.6324323 | -0.4936418 | -1.0403440 |
| H | -0.0041754 | 5.5168581  | 0.0010701  |
| H | 4.7899153  | -2.7813467 | 0.0346501  |
| H | -4.7898588 | -2.7750854 | -0.0322060 |

**Rh BPh<sub>3</sub>**

34

Energy = -720.2691895757

|   |            |            |            |
|---|------------|------------|------------|
| B | 0.0009313  | -0.0029900 | 0.0005893  |
| C | 0.7809350  | 1.3510984  | 0.0011166  |
| C | 0.7822076  | -1.3571638 | 0.0002734  |
| C | -1.5620046 | -0.0020497 | -0.0001684 |
| C | 0.2629725  | 2.4997015  | 0.6381202  |
| C | 2.0333183  | 1.4774582  | -0.6378070 |

|   |            |             |            |
|---|------------|-------------|------------|
| C | 2.0346005  | -1.4860835  | 0.6390288  |
| C | 0.2635375  | -2.5046144  | -0.6382764 |
| C | -2.2984662 | -1.0232005  | 0.6384579  |
| C | -2.2972191 | 1.0205124   | -0.6382776 |
| C | 0.9636050  | 3.7043821   | 0.6527937  |
| C | 2.7252188  | 2.6872604   | -0.6549828 |
| C | 2.7243971  | -2.6974196  | 0.6558333  |
| C | 0.9623976  | -3.7104437  | -0.6541242 |
| C | -3.6920709 | -1.0173867  | 0.6545382  |
| C | -3.6909100 | 1.0163881   | -0.6541327 |
| C | 2.1945151  | 3.8023874   | -0.0012544 |
| C | 2.1924024  | -3.8112069  | 0.0012354  |
| C | -4.3918352 | -0.0000616  | -0.0000294 |
| H | -0.6973305 | 2.4366708   | 1.1441010  |
| H | 2.4578012  | 0.6138536   | -1.1436238 |
| H | 2.4616351  | -0.6237776  | 1.1449825  |
| H | -0.6962730 | -2.4392902  | -1.1448079 |
| H | -1.7635683 | -1.82227611 | 1.1447793  |
| H | -1.7617323 | 1.8198977   | -1.1442614 |
| H | 0.5513603  | 4.5687639   | 1.1666763  |
| H | 3.6791009  | 2.7627567   | -1.1700627 |
| H | 3.6777360  | -2.7745403  | 1.1719976  |
| H | 0.5491710  | -4.5731754  | -1.1700414 |
| H | -4.2348756 | -1.8055233  | 1.1695322  |
| H | -4.2330176 | 1.8052943   | -1.1687925 |
| H | 2.7376825  | 4.7437707   | -0.0017541 |
| H | 2.7339178  | -4.7534768  | 0.0012137  |
| H | -5.4785200 | 0.0002141   | -0.0002142 |

**Rn<sup>-</sup> Ph<sub>2</sub>CN<sub>2</sub><sup>-</sup>**

25

Energy = -611.3220482677

|   |           |            |            |
|---|-----------|------------|------------|
| N | 0.2831716 | 0.5625642  | -1.5703589 |
| N | 1.1968608 | -0.2163212 | -1.3689735 |
| C | 2.5687448 | -0.0961961 | -1.3138625 |
| C | 3.2038440 | 1.2059934  | -1.4648894 |
| C | 3.2701680 | -1.3465236 | -1.0728015 |
| C | 2.5646680 | 2.2613755  | -2.1650630 |
| C | 4.4521088 | 1.5156514  | -0.8635728 |
| C | 2.5905798 | -2.4753509 | -0.5408290 |
| C | 4.6373860 | -1.5399586 | -1.3980112 |
| C | 3.1466804 | 3.5222157  | -2.2759158 |
| H | 1.5987224 | 2.0756896  | -2.6221183 |
| C | 5.0270714 | 2.7774346  | -0.9755745 |
| H | 4.9604387 | 0.7559277  | -0.2782816 |
| C | 3.2308646 | -3.6934865 | -0.3461797 |
| H | 1.5399660 | -2.3683002 | -0.2861919 |
| C | 5.2763396 | -2.7605186 | -1.1924410 |
| H | 5.1970785 | -0.7257817 | -1.8473210 |
| C | 4.3853274 | 3.7977217  | -1.6891765 |
| H | 2.6248363 | 4.2987133  | -2.8324060 |
| H | 5.9826554 | 2.9709831  | -0.4918958 |
| C | 4.5870303 | -3.8550376 | -0.6605396 |
| H | 2.6686287 | -4.5278345 | 0.0693568  |
| H | 6.3251871 | -2.8606206 | -1.4655934 |
| H | 4.8355958 | 4.7828213  | -1.7771358 |
| H | 5.0881328 | -4.8055040 | -0.4988319 |

**Rn Ph<sub>2</sub>CN<sub>2</sub>**

25

Energy = -611.2387774962

|   |           |            |            |
|---|-----------|------------|------------|
| N | 0.1227301 | -0.1152459 | -1.5371991 |
| N | 1.2633835 | -0.0865771 | -1.4433748 |
| C | 2.5703931 | -0.0523598 | -1.3357008 |
| C | 3.2086795 | 1.2682973  | -1.4630008 |
| C | 3.2488823 | -1.3372477 | -1.1009519 |
| C | 2.6177243 | 2.2942062  | -2.2227277 |

|   |           |            |            |
|---|-----------|------------|------------|
| C | 4.4184934 | 1.5363131  | -0.7967920 |
| C | 2.5919845 | -2.4040875 | -0.4609432 |
| C | 4.5702366 | -1.5300021 | -1.5439400 |
| C | 3.2202531 | 3.5462695  | -2.3144456 |
| H | 1.6876044 | 2.1079375  | -2.7531366 |
| C | 5.0213166 | 2.7874577  | -0.9024372 |
| H | 4.8771932 | 0.7664706  | -0.1848859 |
| C | 3.2386224 | -3.6220679 | -0.2676407 |
| H | 1.5735658 | -2.2765823 | -0.1034647 |
| C | 5.2137715 | -2.7481060 | -1.3390701 |
| H | 5.0856912 | -0.7277224 | -2.0616820 |
| C | 4.4283213 | 3.7999012  | -1.6604043 |
| H | 2.7479846 | 4.3232923  | -2.9088333 |
| H | 5.9547010 | 2.9741423  | -0.3786090 |
| C | 4.5546616 | -3.8013687 | -0.7007904 |
| H | 2.7137790 | -4.4313771 | 0.2320529  |
| H | 6.2331242 | -2.8769012 | -1.6923842 |
| H | 4.9005687 | 4.7745762  | -1.7389576 |
| H | 5.0590853 | -4.7504122 | -0.5454296 |

**TSABf'' (cyclization of Af'')**

59

Energy = -2820.882414361

|   |            |            |            |
|---|------------|------------|------------|
| B | 0.4181161  | 0.1803281  | 0.0710944  |
| C | 1.1768536  | 0.6660065  | 1.4535129  |
| C | 1.3450098  | -0.8056416 | -0.8832619 |
| C | -0.0623954 | 1.5849269  | -0.6513106 |
| C | 2.3443116  | 1.4258325  | 1.3537684  |
| C | 0.7133660  | 0.4939403  | 2.7586547  |
| C | 0.8742188  | -1.1754743 | -2.1483526 |
| C | 2.5066996  | -1.4728675 | -0.4948888 |
| C | -1.0592558 | 2.3526666  | -0.0407542 |
| C | 0.4666658  | 2.1541793  | -1.8094550 |
| C | 3.0275466  | 1.9638101  | 2.4364908  |
| F | 2.8817580  | 1.6616825  | 0.1272124  |
| C | 1.3685830  | 1.0130049  | 3.8770869  |
| F | -0.4217861 | -0.1900589 | 3.0271195  |
| C | 1.5047640  | -2.0920494 | -2.9809311 |
| F | -0.2743445 | -0.6353831 | -2.6240856 |
| C | 3.1733785  | -2.4020632 | -1.2937048 |
| F | 3.0603772  | -1.2720416 | 0.7303668  |
| C | -1.5425533 | 3.5514460  | -0.5538067 |
| F | -1.5982222 | 1.9588074  | 1.1392319  |
| C | 0.0180089  | 3.3551200  | -2.3567693 |
| F | 1.4859931  | 1.5613171  | -2.4827891 |
| C | 2.5325881  | 1.7525771  | 3.7192836  |
| F | 4.1612707  | 2.6805138  | 2.2634847  |
| F | 0.8728768  | 0.8117400  | 5.1193354  |
| C | 2.6729347  | -2.7133480 | -2.5502383 |
| F | 0.9995945  | -2.3893769 | -4.1982234 |
| F | 4.2964561  | -3.0108492 | -0.8519140 |
| C | -1.0017615 | 4.0585588  | -1.7297439 |
| F | -2.5223479 | 4.2341757  | 0.0810785  |
| C | 0.5703858  | 3.8480680  | -3.4889517 |
| F | 3.1727418  | 2.2617733  | 4.7918550  |
| F | 3.3009409  | -3.6096481 | -3.3363476 |
| F | -1.4508843 | 5.2212775  | -2.2448931 |
| N | -0.8153706 | -0.6942735 | 0.4037336  |
| N | -1.9717242 | -0.5699850 | -0.1353038 |
| C | -2.7965516 | -1.6309856 | -0.0035980 |
| C | -2.2024371 | -2.6974747 | 0.7631013  |
| C | -4.1730538 | -1.5076814 | -0.4605819 |
| C | -0.7521465 | -2.5807895 | 0.7899029  |
| C | -2.8538756 | -3.4696872 | 1.7375614  |
| C | -4.7308004 | -0.2418137 | -0.7414475 |
| C | -4.9836225 | -2.6445884 | -0.6490798 |
| C | -0.0465681 | -3.1585071 | 1.8968636  |

|   |            |            |            |
|---|------------|------------|------------|
| C | -2.1312507 | -4.0550016 | 2.7742289  |
| H | -3.9382142 | -3.5355734 | 1.7329432  |
| C | -6.0448744 | -0.1229981 | -1.1789392 |
| H | -4.1104181 | 0.6386706  | -0.6060486 |
| C | -6.3025342 | -2.5201561 | -1.0823093 |
| H | -4.5643159 | -3.6311297 | -0.4750785 |
| C | -0.7326895 | -3.8595840 | 2.8656908  |
| H | 1.0353234  | -3.0711650 | 1.9397792  |
| H | -2.6494112 | -4.6237478 | 3.5411593  |
| C | -6.8442029 | -1.2603112 | -1.3481044 |
| H | -6.4548361 | 0.8623222  | -1.3866051 |
| H | -6.9072242 | -3.4126616 | -1.2222850 |
| H | -0.1869027 | -4.3015912 | 3.6960574  |
| H | -7.8717297 | -1.1640091 | -1.6877025 |
| H | -0.2393713 | -2.6433344 | -0.1728142 |

**TSABh'' (cyclization of Ah'')**

59

Energy = -1331.604737242

|   |            |            |            |
|---|------------|------------|------------|
| B | 1.3296694  | 0.4587188  | 0.0750052  |
| C | 2.1851745  | 0.1751825  | 1.4305066  |
| C | 1.9846200  | -0.2683232 | -1.2395172 |
| C | 1.1784203  | 2.0705338  | -0.1229378 |
| C | 3.4665824  | 0.7375653  | 1.5851373  |
| C | 1.7129993  | -0.6084829 | 2.4963607  |
| C | 1.3573690  | -0.1247685 | -2.4930614 |
| C | 3.1173070  | -1.0955185 | -1.1957215 |
| C | 0.3754765  | 2.8304907  | 0.7489299  |
| C | 1.8938962  | 2.7862903  | -1.0962253 |
| C | 4.2404990  | 0.5240878  | 2.7263475  |
| H | 3.8633425  | 1.3650322  | 0.7879495  |
| C | 2.4749586  | -0.8300546 | 3.6482977  |
| H | 0.7267374  | -1.0594312 | 2.4185134  |
| C | 1.8318242  | -0.7634032 | -3.6386670 |
| H | 0.4690636  | 0.5015189  | -2.5634188 |
| C | 3.6059036  | -1.7436365 | -2.3355434 |
| H | 3.6260322  | -1.2399745 | -0.2449761 |
| C | 0.2768934  | 4.2175674  | 0.6481067  |
| H | -0.1907813 | 2.3173854  | 1.5229637  |
| C | 1.8168124  | 4.1795834  | -1.2025374 |
| H | 2.5263479  | 2.2395687  | -1.7928511 |
| C | 3.7462350  | -0.2659274 | 3.7694897  |
| H | 5.2276454  | 0.9757584  | 2.8082328  |
| H | 2.0755825  | -1.4451392 | 4.4530258  |
| C | 2.9651971  | -1.5800881 | -3.5644782 |
| H | 1.3197256  | -0.6301205 | -4.5898029 |
| H | 4.4856368  | -2.3807424 | -2.2632284 |
| C | 1.0015788  | 4.9038478  | -0.3323325 |
| H | -0.3624861 | 4.7694065  | 1.3350349  |
| H | 2.3901552  | 4.6985221  | -1.9690133 |
| H | 4.3428085  | -0.4348985 | 4.6632532  |
| H | 3.3395295  | -2.0838902 | -4.4527265 |
| H | 0.9307052  | 5.9862980  | -0.4139500 |
| N | -0.0880001 | -0.2066829 | 0.2412382  |
| N | -1.2106403 | 0.3023739  | -0.0844932 |
| C | -2.2440830 | -0.5639153 | -0.2284433 |
| C | -1.8597237 | -1.9205403 | 0.0736176  |
| C | -3.5721759 | -0.0268686 | -0.4686772 |
| C | -0.4151934 | -2.0842953 | -0.0186841 |
| C | -2.6190261 | -2.8559348 | 0.7938269  |
| C | -3.8365569 | 1.3521490  | -0.3033946 |
| C | -4.6353991 | -0.8528721 | -0.8905844 |
| C | 0.1946889  | -3.1302777 | 0.7518006  |
| C | -1.9953538 | -3.8898425 | 1.4916079  |
| H | -3.6933634 | -2.7208800 | 0.8845137  |
| C | -5.1061815 | 1.8694320  | -0.5323049 |
| H | -3.0205356 | 2.0005384  | 0.0016983  |

|   |            |            |            |
|---|------------|------------|------------|
| C | -5.9079528 | -0.3295832 | -1.1128030 |
| H | -4.4507004 | -1.9085563 | -1.0657089 |
| C | -0.5838963 | -3.9923306 | 1.4967301  |
| H | 1.2728630  | -3.2532943 | 0.7069070  |
| H | -2.5922560 | -4.5893845 | 2.0706102  |
| C | -6.1569360 | 1.0334199  | -0.9325083 |
| H | -5.2837265 | 2.9336775  | -0.3958809 |
| H | -6.7081692 | -0.9897721 | -1.4387527 |
| H | -0.1092675 | -4.7858155 | 2.0700919  |
| H | -7.1490661 | 1.4405473  | -1.1072200 |
| H | 0.0471365  | -1.8938517 | -0.9909247 |

**TSADf''** (H-abstraction from **Rco** with **Af''**)  
110

Energy = -4984.553414776

|   |            |            |            |
|---|------------|------------|------------|
| B | 2.0977449  | -0.4914364 | -0.4067589 |
| C | 3.6437525  | 0.1384089  | -0.3171255 |
| C | 2.2856053  | -1.9905270 | 0.2951434  |
| C | 1.5123941  | -0.5487261 | -1.9525643 |
| C | 4.5917263  | 0.1376654  | -1.3439545 |
| C | 4.1224978  | 0.6667321  | 0.8883683  |
| C | 1.9600403  | -2.3397931 | 1.6094996  |
| C | 2.9319115  | -3.0164625 | -0.4037331 |
| C | 1.6140911  | 0.5567293  | -2.8060272 |
| C | 0.6885457  | -1.5590202 | -2.4459358 |
| C | 5.8791574  | 0.6559378  | -1.2214499 |
| F | 4.3072257  | -0.3834297 | -2.5667918 |
| C | 5.3991023  | 1.2000685  | 1.0538840  |
| F | 3.3558827  | 0.6602958  | 2.0019676  |
| C | 2.2060295  | -3.5978476 | 2.1640369  |
| F | 1.3761536  | -1.4671389 | 2.4633545  |
| C | 3.1993661  | -4.2814207 | 0.1060083  |
| F | 3.3410227  | -2.8121308 | -1.6830289 |
| C | 0.9651580  | 0.6548536  | -4.0330471 |
| F | 2.4282000  | 1.6039936  | -2.5081727 |
| C | 0.0386053  | -1.5158499 | -3.6764572 |
| F | 0.4307807  | -2.6798166 | -1.7087109 |
| C | 6.2894507  | 1.1995560  | -0.0119071 |
| F | 6.7392558  | 0.6348674  | -2.2692317 |
| F | 5.7916491  | 1.7020386  | 2.2494341  |
| C | 2.8276829  | -4.5820172 | 1.4106873  |
| F | 1.8481048  | -3.8663453 | 3.4428062  |
| F | 3.8129825  | -5.2227154 | -0.6501178 |
| C | 0.1677309  | -0.3913421 | -4.4791526 |
| F | 1.1028844  | 1.7610128  | -4.8059611 |
| F | -0.7547331 | -2.5402938 | -4.0813051 |
| F | 7.5339956  | 1.7068572  | 0.1288345  |
| F | 3.0744593  | -5.8023721 | 1.9347687  |
| F | -0.4897664 | -0.3060840 | -5.6582648 |
| N | 1.1094251  | 0.3792534  | 0.4018211  |
| N | 0.7082843  | 1.4984501  | -0.1784029 |
| C | 0.0636842  | 2.4218238  | 0.5479603  |
| C | 0.1947236  | 2.5608816  | 2.0147940  |
| C | -0.5999702 | 3.4758261  | -0.2287106 |
| C | 0.2521136  | 1.4802578  | 2.9154913  |
| C | 0.4611939  | 3.8450479  | 2.5470894  |
| C | -0.3584678 | 3.6379783  | -1.6128239 |
| C | -1.5621347 | 4.3314823  | 0.3539454  |
| C | 0.5587951  | 1.6737138  | 4.2638680  |
| H | 0.0470175  | 0.4822596  | 2.5655991  |
| C | 0.7518102  | 4.0397605  | 3.8924717  |
| H | 0.4671697  | 4.7002079  | 1.8777814  |
| C | -1.0024815 | 4.6236627  | -2.3506133 |
| H | 0.3548504  | 2.9735529  | -2.0858881 |
| C | -2.2035601 | 5.3220464  | -0.3861676 |
| H | -1.8110223 | 4.2062519  | 1.4027349  |
| C | 0.8032516  | 2.9489819  | 4.7689407  |

|    |            |            |            |
|----|------------|------------|------------|
| H  | 0.5988481  | 0.8099749  | 4.9241631  |
| H  | 0.9560588  | 5.0443664  | 4.2567840  |
| C  | -1.9279624 | 5.4858241  | -1.7463810 |
| H  | -0.7809245 | 4.7244232  | -3.4110845 |
| H  | -2.9398551 | 5.9587018  | 0.0999692  |
| H  | 1.0349586  | 3.0953962  | 5.8210933  |
| H  | -2.4324356 | 6.2539015  | -2.3266047 |
| Co | -4.3790129 | -0.0635843 | 0.3411630  |
| C  | -7.5051641 | 0.6674998  | 0.1199433  |
| C  | -4.2847441 | 2.5944358  | -1.3636710 |
| C  | -6.4112216 | -0.3554222 | 0.1414970  |
| C  | -3.6734907 | 1.7085816  | -0.3269653 |
| C  | -5.9353422 | -0.4786493 | -2.4263887 |
| C  | -4.8237045 | 2.7091767  | 1.7976564  |
| C  | -5.7052254 | -0.8664218 | -0.9987746 |
| C  | -3.9204781 | 1.7506547  | 1.0889208  |
| C  | -5.9003658 | -1.0232955 | 1.3087650  |
| C  | -2.6996638 | 0.6831449  | -0.5670062 |
| C  | -4.7799347 | -1.8774328 | -0.5389918 |
| C  | -3.0925881 | 0.7489961  | 1.7082300  |
| C  | -6.3880991 | -0.8305524 | 2.7110597  |
| C  | -2.1026005 | 0.3388028  | -1.8880172 |
| C  | -4.9029231 | -1.9774229 | 0.8824688  |
| C  | -2.2567991 | 0.1343419  | 0.6963697  |
| C  | -3.8721741 | -2.7085111 | -1.3902039 |
| C  | -3.0251381 | 0.4675523  | 3.1750544  |
| C  | -4.1257621 | -2.9104872 | 1.7552392  |
| C  | -1.2312075 | -0.8516352 | 0.8827775  |
| H  | -7.3724369 | 1.3773506  | -0.7016745 |
| H  | -5.2719896 | 2.9498006  | -1.0539858 |
| H  | -5.0108415 | -0.5290851 | -3.0084606 |
| H  | -5.2443387 | 2.2688203  | 2.7060752  |
| H  | -6.3314928 | 0.5370783  | -2.5051019 |
| H  | -5.6482259 | 3.0307108  | 1.1556988  |
| H  | -7.5396575 | 1.2331303  | 1.0551636  |
| H  | -4.3913497 | 2.0730351  | -2.3184439 |
| H  | -6.6994779 | 0.2027153  | 2.8895068  |
| H  | -1.1065150 | 0.7937168  | -1.9528228 |
| H  | -5.6162308 | -1.0852509 | -3.4415522 |
| H  | -2.7080227 | 0.7094442  | -2.7191637 |
| H  | -3.7335176 | -2.2679083 | -2.3802210 |
| H  | -3.9705331 | 0.7007533  | 3.6726061  |
| H  | -8.4840566 | 0.1871940  | -0.0125580 |
| H  | -3.6453185 | 3.4695482  | -1.5280517 |
| H  | -6.6603408 | -1.1560449 | -2.8969768 |
| H  | -4.2634438 | 3.6057355  | 2.0926594  |
| H  | -2.8869115 | -2.8234496 | -0.9267801 |
| H  | -2.7803499 | -0.5816152 | 3.3644184  |
| H  | -4.1104359 | -2.5670728 | 2.7929183  |
| H  | -1.1065742 | -1.5495977 | 0.0526558  |
| H  | -3.0896013 | -2.9946474 | 1.4111549  |
| H  | -1.2477872 | -1.3619761 | 1.8465705  |
| H  | -7.2551802 | -1.4756595 | 2.9063204  |
| H  | -1.9778301 | -0.7400297 | -1.9981327 |
| H  | -4.2915383 | -3.7135388 | -1.5289536 |
| H  | -2.2377756 | 1.0761778  | 3.6350980  |
| H  | -4.5673826 | -3.9155444 | 1.7421767  |
| H  | 0.0139407  | -0.2296686 | 0.7941259  |

**TSADh''** (H-abstraction from **Rco** with **Ah''**)  
110

Energy = -3495.270313862

|   |           |            |            |
|---|-----------|------------|------------|
| B | 3.1626648 | -0.8633309 | -0.3023400 |
| C | 4.5799770 | -0.0659855 | -0.4834110 |
| C | 3.4396779 | -2.0690318 | 0.7660470  |
| C | 2.5815627 | -1.4125905 | -1.7254909 |
| C | 5.5363257 | -0.4329840 | -1.4464988 |

|    |            |            |            |                                             |            |            |            |
|----|------------|------------|------------|---------------------------------------------|------------|------------|------------|
| C  | 4.9337441  | 0.9890444  | 0.3781501  | C                                           | -5.4206249 | -1.1833401 | 2.4198112  |
| C  | 3.0697671  | -1.9785429 | 2.1197434  | C                                           | -0.8760164 | -0.3891343 | -2.0183267 |
| C  | 4.1297514  | -3.2372208 | 0.3907715  | C                                           | -3.7593127 | -2.4800445 | 0.8613001  |
| C  | 2.6052924  | -0.5905169 | -2.8710662 | C                                           | -1.1968607 | -0.2770298 | 0.5592977  |
| C  | 1.9215822  | -2.6474589 | -1.8675457 | C                                           | -2.5270219 | -3.4353519 | -1.2193426 |
| C  | 6.7737732  | 0.2083911  | -1.5521326 | C                                           | -2.1350381 | 0.3322480  | 2.9229762  |
| H  | 5.2996165  | -1.2397602 | -2.1388258 | C                                           | -3.0039444 | -3.2471098 | 1.8997196  |
| C  | 6.1642502  | 1.6417987  | 0.2848007  | C                                           | -0.1400919 | -1.1720121 | 0.9314501  |
| H  | 4.2166874  | 1.3032978  | 1.1339779  | H                                           | -6.2539243 | 0.5035545  | -1.3148831 |
| C  | 3.3424103  | -2.9963949 | 3.0376958  | H                                           | -4.2008781 | 2.1408116  | -1.7186388 |
| H  | 2.5609310  | -1.0791087 | 2.4566436  | H                                           | -3.6410406 | -1.5498249 | -3.1810241 |
| C  | 4.4149332  | -4.2620805 | 1.2944224  | H                                           | -4.3971622 | 1.9423855  | 2.0915312  |
| H  | 4.4503461  | -3.3455721 | -0.6445311 | H                                           | -5.0414135 | -0.4999340 | -2.9155406 |
| C  | 2.0013562  | -0.9663428 | -4.0729183 | H                                           | -4.7295221 | 2.4793361  | 0.4338368  |
| H  | 3.1050728  | 0.3728733  | -2.8050517 | H                                           | -6.5420135 | 0.5809000  | 0.4301128  |
| C  | 1.3198378  | -3.0437344 | -3.0655883 | H                                           | -3.1969260 | 1.1624110  | -2.8052233 |
| H  | 1.8720369  | -3.3163442 | -1.0099183 | H                                           | -5.7892433 | -0.1534224 | 2.4361298  |
| C  | 7.0958545  | 1.2553089  | -0.6843481 | H                                           | 0.0921293  | 0.1184353  | -2.0936200 |
| H  | 7.4869162  | -0.1030023 | -2.3145084 | H                                           | -4.6908334 | -1.2960412 | 3.2256093  |
| H  | 6.4010175  | 2.4571967  | 0.9672834  | H                                           | -1.4517133 | -0.1695991 | -2.9211604 |
| C  | 4.0150787  | -4.1505385 | 2.6298356  | H                                           | -2.3296332 | -3.1097677 | -2.2432525 |
| H  | 3.0307779  | -2.8896164 | 4.0761114  | H                                           | -3.1195887 | 0.5756257  | 3.3322382  |
| H  | 4.9485717  | -5.1510403 | 0.9605654  | H                                           | -7.3614047 | -0.6427392 | -0.5485936 |
| C  | 1.3530907  | -2.2002249 | -4.1790101 | H                                           | -2.5683477 | -2.6814976 | -2.1494669 |
| H  | 2.0305715  | -0.2947845 | -4.9299798 | H                                           | -5.2664149 | -2.2442476 | -3.1065266 |
| H  | 0.8146522  | -4.0067974 | -3.1288425 | H                                           | -3.4338510 | 3.2376216  | 1.3682026  |
| H  | 8.0550767  | 1.7630647  | -0.7634882 | H                                           | -1.5765697 | -3.4311423 | -0.6756817 |
| H  | 4.2294179  | -4.9474155 | 3.3392732  | H                                           | -1.8534960 | -0.6684802 | 3.2637598  |
| H  | 0.8796646  | -2.4975692 | -5.1124510 | H                                           | -3.0886373 | -2.7772192 | 2.8832441  |
| N  | 2.1243947  | 0.1158104  | 0.3519129  | H                                           | 0.0881871  | -1.9497394 | 0.2013315  |
| N  | 1.7335646  | 1.1447418  | -0.3446095 | H                                           | -1.9404353 | -3.3056453 | 1.6440487  |
| C  | 0.9852945  | 2.1124386  | 0.2383539  | H                                           | -0.1889974 | -1.5626138 | 1.9491423  |
| C  | 1.0490450  | 2.4156625  | 1.6777987  | H                                           | -6.2697373 | -1.8421161 | 2.6468315  |
| C  | 0.3302801  | 3.0256093  | -0.6922142 | H                                           | -0.6614304 | -1.4585671 | -1.9850935 |
| C  | 1.1391617  | 1.4423253  | 2.6982160  | H                                           | -2.8835712 | -4.4731672 | -1.2596978 |
| C  | 1.2380549  | 3.7621799  | 2.0806941  | H                                           | -1.4067450 | 1.0378506  | 3.3405750  |
| C  | 0.6068511  | 2.9851130  | -2.0828220 | H                                           | -3.3869986 | -4.2725952 | 1.9851655  |
| C  | -0.6727248 | 3.9348787  | -0.2754452 | H                                           | 1.0432825  | -0.4872484 | 0.8227648  |
| C  | 1.4087328  | 1.7955917  | 4.0231986  | <b>TSBCf'' (H-transfer from Bf'' to Rn)</b> |            |            |            |
| H  | 0.9612220  | 0.4053019  | 2.4633557  | 84                                          |            |            |            |
| C  | 1.4892785  | 4.1139261  | 3.4007358  | Energy = -3432.136986638                    |            |            |            |
| H  | 1.2202717  | 4.5403120  | 1.3234335  | N                                           | 2.3162034  | 2.1867311  | -0.4091510 |
| C  | -0.0296348 | 3.8379114  | -2.9751326 | N                                           | 3.1707596  | 1.4220379  | -0.1181190 |
| H  | 1.3352219  | 2.2601378  | -2.4230957 | C                                           | 4.4212114  | 1.0210494  | 0.0320238  |
| C  | -1.3089536 | 4.7877104  | -1.1732582 | C                                           | 5.4836987  | 1.9567772  | -0.3496107 |
| H  | -0.9608264 | 3.9556909  | 0.7708708  | C                                           | 4.6240765  | -0.3366942 | 0.5643331  |
| C  | 1.5807652  | 3.1274717  | 4.3933050  | C                                           | 5.1996291  | 3.1073575  | -1.1168928 |
| H  | 1.4706382  | 1.0109227  | 4.7750036  | C                                           | 6.8193702  | 1.7612782  | 0.0656139  |
| H  | 1.6348983  | 5.1614776  | 3.6570122  | C                                           | 3.7384541  | -0.8553677 | 1.5263878  |
| C  | -0.9909499 | 4.7600315  | -2.5349166 | C                                           | 5.6597869  | -1.1694394 | 0.1032824  |
| H  | 0.2202889  | 3.7835485  | -4.0331383 | C                                           | 6.2059268  | 4.0020708  | -1.4698492 |
| H  | -2.0769910 | 5.4671678  | -0.8086856 | H                                           | 4.1785538  | 3.2980001  | -1.4362624 |
| H  | 1.7821147  | 3.3974413  | 5.4271187  | C                                           | 7.8199913  | 2.6619003  | -0.2897986 |
| H  | -1.4921113 | 5.4205709  | -3.2376123 | H                                           | 7.0666130  | 0.9069579  | 0.6868609  |
| Co | -3.2823048 | -0.6263844 | 0.1066143  | C                                           | 3.8716580  | -2.1574625 | 1.9981658  |
| C  | -6.4155711 | -0.0996464 | -0.4166419 | H                                           | 2.9405771  | -0.2197983 | 1.8965436  |
| C  | -3.1800155 | 1.8013075  | -1.9183033 | C                                           | 5.7981323  | -2.4696645 | 0.5850159  |
| C  | -5.2818120 | -1.0513093 | -0.1863267 | H                                           | 6.3390514  | -0.8069678 | -0.6621869 |
| C  | -2.6050814 | 1.0803180  | -0.7425980 | C                                           | 7.5264440  | 3.7873248  | -1.0647495 |
| C  | -4.6092749 | -1.4756189 | -2.6777725 | H                                           | 5.9559905  | 4.8761713  | -2.0660797 |
| C  | -3.9359696 | 2.2840007  | 1.1602401  | H                                           | 8.8372779  | 2.4865062  | 0.0515593  |
| C  | -4.4709852 | -1.6656044 | -1.1989761 | C                                           | 4.9062889  | -2.9739664 | 1.5345231  |
| C  | -2.9492989 | 1.2886800  | 0.6375335  | H                                           | 3.1731114  | -2.5328138 | 2.7412497  |
| C  | -4.8264482 | -1.5324584 | 1.0903059  | H                                           | 6.5988509  | -3.0981781 | 0.2034342  |
| C  | -1.5745329 | 0.0832414  | -0.7902399 | H                                           | 8.3095782  | 4.4878520  | -1.3402487 |
| C  | -3.5377207 | -2.5584033 | -0.5490057 | H                                           | 5.0146194  | -3.9893617 | 1.9053751  |
| C  | -2.1234209 | 0.4164716  | 1.4302128  |                                             |            |            |            |



|                                                                               |            |            |            |   |            |            |            |
|-------------------------------------------------------------------------------|------------|------------|------------|---|------------|------------|------------|
| B                                                                             | -1.3547200 | -0.6925566 | -0.1613717 | C | 4.0253604  | -0.4648589 | 0.6489347  |
| C                                                                             | -3.0027719 | -0.6848950 | -0.2828701 | C | 3.8235766  | 3.4008669  | 0.5890506  |
| C                                                                             | -0.6033637 | -1.7236587 | -1.2101151 | C | 5.6397296  | 2.0377505  | 1.4114144  |
| C                                                                             | -0.8052249 | -1.1880330 | 1.3149674  | C | 3.2574655  | -1.5214738 | 1.1732231  |
| C                                                                             | -3.9198513 | -0.7992669 | 0.7595487  | C | 5.2637768  | -0.7773584 | 0.0555573  |
| C                                                                             | -3.5759196 | -0.3439933 | -1.5105778 | C | 4.5945241  | 4.5426046  | 0.7899106  |
| C                                                                             | 0.7937111  | -1.7286768 | -1.2657872 | H | 2.8138982  | 3.4994236  | 0.1992495  |
| C                                                                             | -1.2018344 | -2.7407962 | -1.9566987 | C | 6.4042188  | 3.1841506  | 1.6099086  |
| C                                                                             | 0.0293508  | -0.4809879 | 2.1804071  | H | 6.0488849  | 1.0698151  | 1.6812050  |
| C                                                                             | -1.1008628 | -2.4860388 | 1.7383170  | C | 3.7033784  | -2.8379006 | 1.0909332  |
| C                                                                             | -5.2949225 | -0.6235391 | 0.6014073  | H | 2.3023036  | -1.3068666 | 1.6454056  |
| F                                                                             | -3.5205600 | -1.0638209 | 2.0295415  | C | 5.7123757  | -2.0945381 | -0.0128198 |
| C                                                                             | -4.9363153 | -0.1592662 | -1.7185799 | H | 5.8623679  | 0.0164233  | -0.3813439 |
| F                                                                             | -2.7764204 | -0.1571771 | -2.5932530 | C | 5.8937765  | 4.4474239  | 1.2968419  |
| C                                                                             | 1.5549545  | -2.6195635 | -2.0144846 | H | 4.1762414  | 5.5164716  | 0.5473609  |
| F                                                                             | 1.4830340  | -0.8096846 | -0.5524904 | H | 7.4055231  | 3.0891498  | 2.0231905  |
| C                                                                             | -0.4835494 | -3.6588467 | -2.7223074 | C | 4.9346903  | -3.1351482 | 0.5027544  |
| F                                                                             | -2.5449902 | -2.9190134 | -1.9641627 | H | 3.0806480  | -3.6314606 | 1.4930255  |
| C                                                                             | 0.5080826  | -1.0052783 | 3.3817613  | H | 6.6667631  | -2.3104949 | -0.4869347 |
| F                                                                             | 0.4571961  | 0.7702506  | 1.8936554  | H | 6.4929847  | 5.3399631  | 1.4529464  |
| C                                                                             | -0.6415174 | -3.0527358 | 2.9199652  | H | 5.2825621  | -4.1628446 | 0.4433167  |
| F                                                                             | -1.9038597 | -3.2710078 | 0.9715296  | B | -1.4507780 | -1.6493799 | -0.3978173 |
| C                                                                             | -5.8113755 | -0.3055030 | -0.6469137 | C | -2.8927511 | -2.4062882 | -0.5283105 |
| F                                                                             | -6.1306070 | -0.7474050 | 1.6575525  | C | -0.4238204 | -2.1379333 | -1.5745443 |
| F                                                                             | -5.4198837 | 0.1581601  | -2.9403206 | C | -0.7601401 | -1.8724858 | 1.0659402  |
| C                                                                             | 0.9037582  | -3.5984529 | -2.7577132 | C | -3.2080207 | -3.5686153 | 0.1934708  |
| F                                                                             | 2.8996761  | -2.5466820 | -2.0289813 | C | -3.8726288 | -1.9550339 | -1.4339493 |
| F                                                                             | -1.1257198 | -4.6182951 | -3.4239649 | C | 0.9645417  | -1.9827398 | -1.4162316 |
| C                                                                             | 0.1757052  | -2.2997104 | 3.7563976  | C | -0.8580498 | -2.8058130 | -2.8028499 |
| F                                                                             | 1.3188025  | -0.2708336 | 4.1764781  | C | -0.7218650 | -0.8998932 | 2.0783659  |
| F                                                                             | -0.9798027 | -4.3142331 | 3.2684240  | C | -0.1543219 | -3.1086294 | 1.3699775  |
| F                                                                             | -7.1377897 | -0.1336208 | -0.8178490 | C | -4.4197635 | -4.2463891 | 0.0266622  |
| F                                                                             | 1.6074672  | -4.4794219 | -3.4940792 | H | -2.4924636 | -3.9503674 | 0.9184966  |
| F                                                                             | 0.6467776  | -2.8231490 | 4.9064726  | C | -5.0873190 | -2.6188930 | -1.6128846 |
| N                                                                             | -1.0202452 | 0.8211651  | -0.4407567 | H | -3.6821744 | -1.0511377 | -2.0088178 |
| N                                                                             | -1.6757708 | 1.6898303  | 0.3302420  | C | 1.8737323  | -2.3014365 | -2.4250955 |
| C                                                                             | -1.4464615 | 2.9501890  | -0.0838614 | H | 1.3449139  | -1.5887796 | -0.4798803 |
| C                                                                             | -0.6190917 | 2.9416197  | -1.2325720 | C | 0.0373001  | -2.9861265 | -3.8274242 |
| C                                                                             | -2.0923283 | 4.0630138  | 0.6142658  | H | -1.9233231 | -2.8146396 | -2.9656250 |
| C                                                                             | -0.2021829 | 1.5324603  | -1.3831484 | C | -0.1197626 | -1.1387659 | 3.3174829  |
| C                                                                             | -0.2352128 | 3.8845811  | -2.1952524 | H | -1.1707704 | 0.0727454  | 1.9002838  |
| C                                                                             | -3.2599265 | 3.8388270  | 1.3672589  | C | 0.4284175  | -3.3715150 | 2.6102365  |
| C                                                                             | -1.5696696 | 5.3658756  | 0.5602609  | H | -0.1243300 | -3.8804689 | 0.6031706  |
| C                                                                             | 0.1386884  | 1.0906774  | -2.7381623 | C | -5.3697333 | -3.7741803 | -0.8804975 |
| C                                                                             | 0.3347332  | 3.4408724  | -3.3804052 | H | -4.6250350 | -5.1413007 | 0.6117116  |
| H                                                                             | -0.4538172 | 4.9387730  | -2.0601349 | H | -5.8177319 | -2.2319699 | -2.3215216 |
| C                                                                             | -3.8867567 | 4.8868518  | 2.0340701  | C | 1.4104206  | -2.7995141 | -3.6454693 |
| H                                                                             | -3.6592720 | 2.8306135  | 1.4181258  | H | 2.9384303  | -2.1553037 | -2.2562681 |
| C                                                                             | -2.2030607 | 6.4153892  | 1.2255025  | H | -0.3351644 | -3.3819790 | -4.7704720 |
| H                                                                             | -0.6481170 | 5.5528357  | 0.0183743  | C | 0.4539270  | -2.3805383 | 3.5948518  |
| C                                                                             | 0.4727467  | 2.0484781  | -3.6553040 | H | -0.0958634 | -0.3503047 | 4.0672137  |
| H                                                                             | 0.2084897  | 0.0363999  | -2.9701626 | H | 0.8782578  | -4.3433029 | 2.8049171  |
| H                                                                             | 0.6120658  | 4.1592015  | -4.1462433 | H | -6.3162779 | -4.2938783 | -1.0110216 |
| C                                                                             | -3.3655153 | 6.1830536  | 1.9628250  | H | 2.1086567  | -3.0471175 | -4.4419103 |
| H                                                                             | -4.7894346 | 4.6961326  | 2.6087369  | H | 0.9240264  | -2.5701605 | 4.5569204  |
| H                                                                             | -1.7807664 | 7.4155291  | 1.1750244  | N | -1.7448887 | -0.0959476 | -0.6121383 |
| H                                                                             | 0.8063600  | 1.7428220  | -4.6435288 | N | -2.7039658 | 0.4635813  | 0.1029604  |
| H                                                                             | -3.8587193 | 7.0010823  | 2.4805871  | C | -2.7268519 | 1.8070630  | -0.0873832 |
| H                                                                             | 0.9163948  | 1.6202183  | -0.8490650 | C | -1.7248275 | 2.1826601  | -1.0060522 |
|                                                                               |            |            |            | C | -3.7518110 | 2.5993193  | 0.5891496  |
|                                                                               |            |            |            | C | -0.9521090 | 0.9404688  | -1.2554680 |
|                                                                               |            |            |            | C | -1.4387741 | 3.3453609  | -1.7394099 |
|                                                                               |            |            |            | C | -4.9231286 | 1.9762245  | 1.0625156  |
|                                                                               |            |            |            | C | -3.6026750 | 3.9823852  | 0.7945037  |
|                                                                               |            |            |            | C | -0.3200614 | 0.8371906  | -2.5863795 |
|                                                                               |            |            |            | C | -0.6074699 | 3.2551976  | -2.8451790 |
|                                                                               |            |            |            | H | -1.9305592 | 4.2846864  | -1.5080301 |
| <b>TSBCh1<sup>+</sup></b> (higher TS: H-transfer from <b>Bh<sup>+</sup></b> ) |            |            |            |   |            |            |            |
| 84                                                                            |            |            |            |   |            |            |            |
| Energy = -1942.866836030                                                      |            |            |            |   |            |            |            |
| N                                                                             | 1.2288018  | 1.7183178  | 0.3925768  |   |            |            |            |
| N                                                                             | 2.2157945  | 1.0845282  | 0.5043402  |   |            |            |            |
| C                                                                             | 3.5176729  | 0.9148602  | 0.6834704  |   |            |            |            |
| C                                                                             | 4.3314683  | 2.1165447  | 0.8833906  |   |            |            |            |

|   |            |            |            |
|---|------------|------------|------------|
| C | -5.9116900 | 2.7148626  | 1.7053710  |
| H | -5.0359093 | 0.9067153  | 0.9131048  |
| C | -4.5972091 | 4.7200993  | 1.4359322  |
| H | -2.6911138 | 4.4774424  | 0.4759522  |
| C | -0.1027264 | 1.9921593  | -3.2821920 |
| H | 0.0604056  | -0.1142253 | -2.9322530 |
| H | -0.4020494 | 4.1409683  | -3.4396445 |
| C | -5.7584627 | 4.0931109  | 1.8920955  |
| H | -6.8101500 | 2.2161328  | 2.0602677  |
| H | -4.4593659 | 5.7876628  | 1.5874766  |
| H | 0.4407494  | 1.9467425  | -4.2230268 |
| H | -6.5332365 | 4.6690040  | 2.3908553  |
| H | -0.0265191 | 1.0671792  | -0.5149931 |

**TSBCh''** (H-transfer from **Bh''** to **Rn**)

84

Energy = -1942.871994621

|   |            |            |            |
|---|------------|------------|------------|
| N | 1.2384730  | 1.4965230  | 0.3091840  |
| N | 0.9720890  | 2.5000630  | 0.8753690  |
| C | 1.0593830  | 3.3470140  | 1.8922390  |
| C | 1.8912260  | 2.9569080  | 3.0337980  |
| C | 0.3085210  | 4.6053610  | 1.7727370  |
| C | 2.3522560  | 1.6307240  | 3.1782330  |
| C | 2.2828950  | 3.8956490  | 4.0143040  |
| C | 0.2167580  | 5.2601340  | 0.5298340  |
| C | -0.3627280 | 5.1770300  | 2.8692380  |
| C | 3.1373050  | 1.2572330  | 4.2640370  |
| H | 2.0733390  | 0.8824750  | 2.4429330  |
| C | 3.0726790  | 3.5146580  | 5.0962160  |
| H | 1.9740970  | 4.9313770  | 3.9174910  |
| C | -0.5212530 | 6.4331480  | 0.3877540  |
| H | 0.7242210  | 4.8331140  | -0.3301020 |
| C | -1.0911510 | 6.3557490  | 2.7280600  |
| H | -0.3406850 | 4.6719740  | 3.8302420  |
| C | 3.5019610  | 2.1919590  | 5.2374030  |
| H | 3.4584730  | 0.2223800  | 4.3532010  |
| H | 3.3594870  | 4.2613560  | 5.8325940  |
| C | -1.1744990 | 6.9948280  | 1.4883620  |
| H | -0.5777840 | 6.9154440  | -0.5852500 |
| H | -1.6155640 | 6.7656250  | 3.5880510  |
| H | 4.1133920  | 1.8967600  | 6.0856080  |
| H | -1.7477230 | 7.9112210  | 1.3794540  |
| B | -1.3714840 | -1.5776210 | -0.3875350 |
| C | -2.7753200 | -2.4113380 | -0.4527150 |
| C | -0.3658600 | -2.0115270 | -1.6032750 |
| C | -0.6168240 | -1.7603540 | 1.0500120  |
| C | -2.9975790 | -3.5868850 | 0.2826280  |
| C | -3.8181340 | -2.0110570 | -1.3107610 |
| C | 1.0165180  | -1.7619320 | -1.5147750 |
| C | -0.8265530 | -2.5734950 | -2.8055810 |
| C | -0.6026840 | -0.7997360 | 2.0739360  |
| C | 0.0701010  | -2.9617280 | 1.3184090  |
| C | -4.1797220 | -4.3251670 | 0.1713300  |
| H | -2.2311210 | -3.9301520 | 0.9739180  |
| C | -5.0047090 | -2.7355570 | -1.4340130 |
| H | -3.7000440 | -1.0983470 | -1.8913940 |
| C | 1.8860560  | -2.0218360 | -2.5755890 |
| H | 1.4148260  | -1.3319390 | -0.5987940 |
| C | 0.0312050  | -2.8418050 | -3.8764160 |
| H | -1.8867730 | -2.7944700 | -2.9103530 |
| C | 0.0430570  | -1.0212210 | 3.2936440  |
| H | -1.1138630 | 0.1467130  | 1.9249490  |
| C | 0.7141390  | -3.2013950 | 2.5330960  |
| H | 0.1165030  | -3.7239230 | 0.5423990  |
| C | -5.1934130 | -3.9032550 | -0.6907430 |
| H | -4.3121610 | -5.2282200 | 0.7648260  |
| H | -5.7864140 | -2.3874340 | -2.1069210 |

|   |            |            |            |
|---|------------|------------|------------|
| C | 1.3947140  | -2.5583440 | -3.7687060 |
| H | 2.9466540  | -1.7995790 | -2.4759640 |
| H | -0.3632410 | -3.2686190 | -4.7966290 |
| C | 0.7037060  | -2.2261490 | 3.5336310  |
| H | 0.0404130  | -0.2436270 | 4.0540380  |
| H | 1.2321980  | -4.1447190 | 2.6969240  |
| H | -6.1172490 | -4.4707800 | -0.7777070 |
| H | 2.0660940  | -2.7595730 | -4.6003350 |
| H | 1.2124650  | -2.3986560 | 4.4794170  |
| N | -1.7472570 | -0.0431170 | -0.6125620 |
| N | -2.6392100 | 0.5090510  | 0.1914350  |
| C | -2.6596670 | 1.8564730  | 0.0344020  |
| C | -1.7333630 | 2.2425670  | -0.9558760 |
| C | -3.6089660 | 2.6496070  | 0.8123310  |
| C | -1.0137150 | 0.9995280  | -1.3188500 |
| C | -1.5245240 | 3.4190400  | -1.6970110 |
| C | -4.7663800 | 2.0425020  | 1.3366630  |
| C | -3.3941570 | 4.0149470  | 1.0654330  |
| C | -0.5496450 | 0.9167290  | -2.7199850 |
| C | -0.8353180 | 3.3432720  | -2.8941480 |
| H | -1.9737640 | 4.3557170  | -1.3860150 |
| C | -5.6826560 | 2.7821640  | 2.0781320  |
| H | -4.9269300 | 0.9849810  | 1.1492780  |
| C | -4.3168020 | 4.7530010  | 1.8046730  |
| H | -2.4846940 | 4.4929720  | 0.7176700  |
| C | -0.4046010 | 2.0815570  | -3.4154780 |
| H | -0.2286870 | -0.0332640 | -3.1263160 |
| H | -0.6936070 | 4.2382740  | -3.4935040 |
| C | -5.4666130 | 4.1447920  | 2.3120450  |
| H | -6.5719290 | 2.2972550  | 2.4731760  |
| H | -4.1250140 | 5.8049830  | 1.9962910  |
| H | 0.0181940  | 2.0501850  | -4.4169380 |
| H | -6.1844570 | 4.7225690  | 2.8881970  |
| H | -0.0001660 | 1.0527340  | -0.6963190 |

**TSDef** (trapping **Dco** with **B(C<sub>6</sub>F<sub>5</sub>)<sub>3</sub>**)

84

Energy = -4372.550279455

|    |            |            |            |
|----|------------|------------|------------|
| Co | -0.0389928 | -0.6560644 | -3.9906661 |
| C  | 0.6340574  | 0.3764024  | -6.9725306 |
| C  | 0.9854316  | 2.2967206  | -3.6095956 |
| C  | 0.4973317  | -0.7424025 | -5.9856459 |
| C  | 0.1938160  | 1.1270566  | -3.1155243 |
| C  | 2.9549258  | -0.7664048 | -5.1039403 |
| C  | -2.1013655 | 1.6913216  | -4.2483113 |
| C  | 1.5395020  | -1.2539855 | -5.1377030 |
| C  | -1.1954536 | 0.8603934  | -3.3932830 |
| C  | -0.6871657 | -1.5128174 | -5.7350703 |
| C  | 0.6588198  | 0.1044743  | -2.2176165 |
| C  | 1.0094570  | -2.3782950 | -4.3958754 |
| C  | -1.5636302 | -0.3187341 | -2.6563137 |
| C  | -2.0069542 | -1.3468354 | -6.4228629 |
| C  | 2.0298038  | 0.0160668  | -1.6280241 |
| C  | -0.3622878 | -2.5322930 | -4.7597785 |
| C  | -0.4728164 | -0.6999249 | -1.7557200 |
| C  | 1.7228481  | -3.2218775 | -3.3874434 |
| C  | -2.9290179 | -0.9262522 | -2.6140338 |
| C  | -1.2758169 | -3.5832261 | -4.2122363 |
| C  | -0.4720584 | -1.6911297 | -0.8088760 |
| H  | 1.3930700  | 1.0967501  | -6.6544704 |
| H  | 0.6009033  | 2.6638261  | -4.5650260 |
| H  | 3.4365160  | -1.0000340 | -4.1510677 |
| H  | -2.9244507 | 1.0948315  | -4.6505716 |
| H  | 3.0103189  | 0.3153124  | -5.2571876 |
| H  | -1.5598997 | 2.1361131  | -5.0882458 |
| H  | -0.3106113 | 0.9129498  | -7.1011558 |
| H  | 2.0405374  | 2.0402471  | -3.7407284 |

|   |            |             |            |   |            |            |            |
|---|------------|-------------|------------|---|------------|------------|------------|
| H | -2.1737450 | -0.3081628  | -6.7214369 | C | -0.5147052 | -1.9680792 | 3.4770759  |
| H | 2.0433898  | 0.5181101   | -0.6518874 | C | -2.4291083 | 0.5820321  | 1.7803899  |
| H | -2.8357282 | -1.6530700  | -5.7784504 | C | -0.8544082 | 1.8642435  | 0.5516529  |
| H | 2.7790922  | 0.4974512   | -2.2612413 | C | 3.0712713  | 2.9213696  | 2.7355862  |
| H | 2.7166663  | -2.8253308  | -3.1650398 | C | 3.9354967  | 0.7041892  | 2.3496456  |
| H | -3.4753914 | -0.7690678  | -3.5477897 | C | -0.0592891 | -1.1366856 | 6.0745093  |
| H | 0.9333309  | -0.0054854  | -7.9580628 | C | -0.6353484 | -2.8810019 | 4.5184571  |
| H | 0.9326551  | 3.1224217   | -2.8878312 | C | -3.4568545 | 1.0364930  | 0.9684989  |
| H | 3.5442556  | -1.2426393  | -5.8988107 | C | -1.8626613 | 2.3571377  | -0.2605126 |
| H | -2.5388902 | 2.5108831   | -3.6643581 | C | 4.1552601  | 2.0646678  | 2.5500902  |
| H | 1.1522211  | -3.2642450  | -2.4492942 | C | -0.4133042 | -2.4600469 | 5.8276513  |
| H | -2.8790346 | -2.0004360  | -2.4172614 | C | -3.1738634 | 1.9311131  | -0.0616446 |
| H | -1.0508422 | -4.5607495  | -4.6584553 | F | 0.7603995  | 3.2643644  | 2.9012162  |
| H | 0.4238103  | -1.9530236  | -0.2597423 | F | 2.4587882  | -1.1037619 | 2.1444388  |
| H | -2.3235430 | -3.3549989  | -4.4220176 | F | 0.4023047  | 1.0218379  | 5.2894909  |
| H | -1.3752025 | -2.2559443  | -0.6029654 | F | -0.7138266 | -2.4265147 | 2.2265809  |
| H | -2.0497165 | -1.9635361  | -7.3306496 | F | -2.7861835 | -0.2681629 | 2.7628752  |
| H | 2.3257457  | -1.0243201  | -1.4645699 | F | 0.3881187  | 2.2996331  | 0.2685165  |
| H | 1.8459224  | -4.2495069  | -3.7518110 | F | 3.2862273  | 4.2322933  | 2.9451809  |
| H | -3.5235327 | -0.4770778  | -1.8057826 | F | 4.9792332  | -0.1225182 | 2.1618045  |
| H | -1.1529790 | -3.6771591  | -3.1267795 | F | 0.1439768  | -0.7206499 | 7.3373389  |
| B | 0.0563805  | 0.4385979   | 2.5298123  | F | -0.9608597 | -4.1638452 | 4.2767081  |
| C | 1.5133207  | 1.0471117   | 2.5022001  | F | -4.7235672 | 0.6299184  | 1.1641572  |
| C | -0.1570877 | -0.6326450  | 3.6742324  | F | -1.5922027 | 3.2451072  | -1.2317795 |
| C | -1.0772293 | 0.9533745   | 1.6088299  | F | 5.4051313  | 2.5491750  | 2.5692077  |
| C | 1.7828036  | 2.4032765   | 2.7019310  | F | -0.5397564 | -3.3249995 | 6.8444657  |
| C | 2.6306073  | 0.2228548   | 2.3467499  | F | -4.1555104 | 2.3857656  | -0.8492675 |
| C | 0.0730758  | -0.22610214 | 5.0024595  |   |            |            |            |

#### 4. References

- [1] (a) C. Tang, Q. Liang, A. R. Jupp, T. C. Johnstone, R. C. Neu, D. Song, S. Grimme, D. W. Stephan, *Angewandte Chemie International Edition* **2017**, *56*, 16588-16592; (b) J. Zhou, L. L. Liu, L. L. Cao, D. W. Stephan, *Chem. Commun.* **2018**, *54*, 4390-4393.
- [2] TURBOMOLE, version 7.3, **2018**, TURBOMOLE GmbH, Karlsruhe, See <http://www.turbomole.com>
- [3] J. Tao, J. P. Perdew, V. N. Staroverov, G. E. Scuseria, *Physical Review Letters* **2003**, *91*, 146401.
- [4] (a) S. Grimme, J. Antony, S. Ehrlich, H. Krieg, *The Journal of Chemical Physics* **2010**, *132*, 154104-154119; (b) S. Grimme, S. Ehrlich, L. Goerigk, *Journal of Computational Chemistry* **2011**, *32*, 1456-1465.
- [5] (a) F. Weigend, M. Häser, H. Patzelt, R. Ahlrichs, *Chemical Physics Letters* **1998**, *294*, 143-152; (b) F. Weigend, R. Ahlrichs, *Physical Chemistry Chemical Physics* **2005**, *7*, 3297-3305.
- [6] A. Klamt, G. Schüürmann, *Journal of the Chemical Society, Perkin Transactions 2* **1993**, 799-805.
- [7] (a) K. Eichkorn, F. Weigend, O. Treutler, R. Ahlrichs, *Theoretical Chemistry Accounts* **1997**, *97*, 119-124; (b) F. Weigend, *Physical Chemistry Chemical Physics* **2006**, *8*, 1057-1065.
- [8] P. Deglmann, K. May, F. Furche, R. Ahlrichs, *Chemical Physics Letters* **2004**, *384*, 103-107.
- [9] S. Grimme, *Chemistry - A European Journal* **2012**, *18*, 9955-9964.
- [10] F. Eckert, A. Klamt, *AIChE Journal* **2002**, *48*, 369-385.
- [11] F. Eckert, A. Klamt, COSMOtherm, Version C3.0, Release 16.01, **2015**, COSMOlogic GmbH & Co., Leverkusen, Germany
- [12] Y. Zhao, D. G. Truhlar, *The Journal of Physical Chemistry A* **2005**, *109*, 5656-5667.
- [13] F. Weigend, F. Furche, R. Ahlrichs, *The Journal of Chemical Physics* **2003**, *119*, 12753-12762.
- [14] J. L. Robbins, N. Edelstein, B. Spencer, J. C. Smart, *Journal of the American Chemical Society* **1982**, *104*, 1882-1893.
